# Supplementary material
Source: PubMed Central journal article supplement (PMC2652727)

## Supporting Information

### Catalytic Enantioselective Peroxidation of $\alpha,\beta$ -Unsaturated Ketones

Xiaojie Lu, Yan Liu, Bingfeng Sun, Brittany Cindric, Li Deng\*

*Department of Chemistry, Brandeis University*

*Waltham, Massachusetts, 02454-9110*

deng@brandeis.edu

**General Information:**  $^1\text{H}$  and  $^{13}\text{C}$  NMR spectra were recorded on a Varian instrument (400 MHz and 100 MHz, respectively).  $^1\text{H}$  NMR spectra were internally referenced to tetramethylsilane signal and  $^{13}\text{C}$  NMR spectra were internally referenced to  $\text{CDCl}_3$  signal ( $\delta = 77.0$  ppm). Data for  $^1\text{H}$  NMR are reported as follows: chemical shift ( $\delta$ , ppm), multiplicity (s, singlet; d, doublet; t, triplet; q, quartet; m, multiplet), coupling constant (Hz), and integration. Data for  $^{13}\text{C}$  NMR are reported in terms of chemical shift ( $\delta$ , ppm). Infrared spectra were recorded on a Perkin Elmer FT-IR Spectrometer and are reported in frequency of absorption ( $\text{cm}^{-1}$ ). High resolution mass spectra for all the new compounds were done by a Micromass Q-ToF instrument (ESI). Specific rotations were measured on a Jasco Digital Polarimeter. High performance liquid chromatography (HPLC) analysis was performed on a Hewlett-Packard 1100 Series instrument equipped with a quaternary pump using Daicel Chiralcel OJ or OD Columns (250 x 4.6 mm), Chiralpak AD or AS Columns (250 x 4.6 mm), or Regis Pirckle covalent (*R, R*) Whelk-O 1 Column (250 x 4.6 mm). UV absorption was monitored at 220 nm. Analytical gas-liquid chromatography (GLC) was performed on a Hewlett-Packard 6890 Series instrument equipped with a split mode capillary injection system and a flame ionization detector using HP chiral column (20% Permethylated  $\beta$ -Cyclodextrin, 30m x 0.25 mm).

**Materials:** Enones **1** was prepared according to literature methods<sup>1</sup> except those which could be purchased from the Aldrich, ACROS or Alfa Aesar. Purchased compounds were used without further purification. *T*-butyl hydroperoxide (**2a**, 5.0-6.0 M in decane) and cumene hydroperoxide (**2b**, ~80% in cumene) were purchased from Aldrich, and 2-hydroperoxy-2-methoxypropane (**2c**) was prepared according to literature methods.<sup>2</sup> Quinine and quinidine were purchased from Aldrich., and used without further

purification. All the Cinchona alkaloid catalysts are prepared according to literature methods.<sup>3</sup>

### 1. General procedure for peroxidation of enones with TBHP.

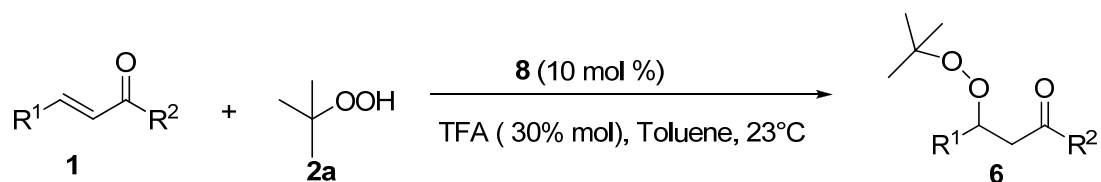

To a solution of enone **1** (0.3 mmol), catalyst **8** (0.03 mmol, 10 mol%), and trifluoroacetic acid (6.9  $\mu$ L, 0.09 mmol, 30 mol%) in toluene (0.3 ml) at room temperature was added *t*-butyl hydroperoxide **2a** (0.36 mmol, 1.2 equiv.). The reaction mixture was kept at room temperature for 4h, then passed through a short plug of silica gel for removal of the catalyst. The silica gel plug was washed with diethyl ether, the eluent was concentrated in *vacuo*, and the residue was subjected to silica gel flash chromatography. The racemic product for HPLC or GC analysis was prepared by mixing the products of Q-NH<sub>2</sub> and QD-NH<sub>2</sub> catalyzed reactions.

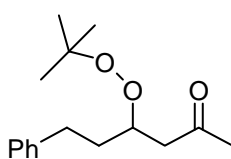 **6Aa** was obtained as a colorless oil (71.1 mg) in 90% yield after flash chromatography (Hexanes/Ethyl acetate = 10:1) and in 91% ee determined by HPLC [Daicel Chiralcel AS-H, Hexanes / IPA = 99:1, 0.8 mL/min,  $\lambda$  = 220 nm, 20.0°C,  $t_r$  (major) = 11.12 min,  $t_r$  (minor) = 10.01 min].  $[\alpha]_D^{25}$  = 35.8 ( $c$  = 0.57, CHCl<sub>3</sub>); <sup>1</sup>H NMR (400 MHz, CDCl<sub>3</sub>)  $\delta$  1.21 (s, 9H), 1.79-1.89 (m, 2H), 2.16 (s, 3H), 2.46 (dd,  $J_1$  = 4.8 Hz,  $J_2$  = 5.2 Hz, 1H), 2.62-2.70 (m, 1H), 2.74-2.80 (m, 1H), 2.90 (dd,  $J_1$  = 6.0 Hz,  $J_2$  = 6.8 Hz, 1H), 4.43-4.47 (m, 1H), 7.14-7.18 (m, 3H), 7.24-7.28 (m, 2H); <sup>13</sup>C NMR (100 MHz, CDCl<sub>3</sub>)  $\delta$  26.34, 30.84, 31.85, 34.75, 47.53, 79.38, 80.33, 125.85, 128.28, 128.35, 141.69, 207.40; IR (neat)  $\nu$  2978, 2931, 1715, 1604, 1497, 1455, 1363, 1242, 1197, 1053, 880, 748, 700. HRMS (ESI/[M+Na]<sup>+</sup>) Calcd. for: C<sub>16</sub>H<sub>24</sub>O<sub>3</sub>Na 287.1623, found 287.1612.

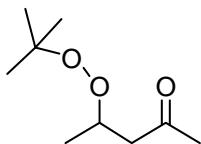

**6Ba** was obtained as a colorless oil (45.2 mg) in 88% yield after flash chromatography (Hexanes/Ethyl acetate = 20:1) in 84% ee. The ee was determined by GC HP Chiral column (20% Permethylated  $\beta$ -Cyclodextrin, 30m x 0.25 mm) after hydrogenation of the peroxide to the  $\beta$ -hydroxyl ketone [Inject Temp: 240 °C, FID Temp: 260 °C, Inlet pressure: 10 psi., Oven Temp: 50 °C, 5 min, 2 °C/min to 80°C, retention times: 38.4 min and 39.3 min].  $[\alpha]_{\text{D}}^{25} = 20$  ( $c = 0.15$ ,  $\text{CHCl}_3$ );  $^1\text{H NMR}$  (400 MHz,  $\text{CDCl}_3$ )  $\delta$  1.16 (s, 3H), 1.18 (s, 9H), 2.16 (s, 3H), 2.39 (dd,  $J_1 = 6.0$  Hz,  $J_2 = 6.4$  Hz, 1H), 2.85 (dd,  $J_1 = 6.0$  Hz,  $J_2 = 6.4$  Hz, 1H), 4.42-4.49 (m, 1H);  $^{13}\text{C NMR}$  (100 MHz,  $\text{CDCl}_3$ )  $\delta$  18.47, 26.30, 30.91, 48.93, 76.17, 80.29, 207.28; IR (neat)  $\nu$  2976, 2926, 1717, 1457, 1364, 1242, 1198, 1094, 867. HRMS (ESI/[M+Na] $^+$ ) Calcd. For:  $\text{C}_9\text{H}_{18}\text{O}_3\text{Na}$  197.1154, found 197.1155.

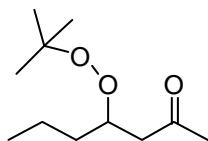

**6Ca** was obtained as a colorless oil (53.7 mg) in 91% yield after flash chromatography (Hexanes/Ethyl acetate = 20:1) and in 90% ee. The ee was determined by GC HP Chiral column (20% Permethylated  $\beta$ -Cyclodextrin, 30m x 0.25 mm) after the hydrogenation of the peroxide to the  $\beta$ -hydroxyl ketone [Inject Temp: 240 °C, FID Temp: 260 °C, Inlet pressure: 10 psi. Oven Temp: 50 °C, 5 min, 2.5°C/min to 100 °C, retention times: 38.0 min and 38.4 min].  $[\alpha]_{\text{D}}^{25} = 61.0$  ( $c = 0.63$ ,  $\text{CHCl}_3$ );  $^1\text{H NMR}$  (400 MHz,  $\text{CDCl}_3$ )  $\delta$  0.89 (t,  $J = 6.8$ Hz, 3H), 1.18 (s, 9H), 1.32-1.52 (m, 4H), 2.17 (s, 3H), 2.41 (dd,  $J_1 = 4.8$  Hz,  $J_2 = 5.2$  Hz, 1H), 2.84 (dd,  $J_1 = 6.4$  Hz,  $J_2 = 6.8$  Hz, 1H), 4.37-4.39 (m, 1H);  $^{13}\text{C NMR}$  (100 MHz,  $\text{CDCl}_3$ )  $\delta$  14.07, 18.87, 26.27, 30.89, 35.22, 47.72, 79.94, 80.29, 207.76; IR (neat)  $\nu$  2963, 2936, 2875, 1716, 1459, 1363, 1197, 1026, 886; HRMS (ESI/[M+Na] $^+$ ) Calcd. for:  $\text{C}_{11}\text{H}_{22}\text{O}_3\text{Na}$  225.1467, found 225.1471.

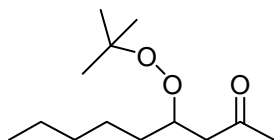

(+) **6Da** was obtained as a colorless oil (59.7 mg) in 86% yield after flash chromatography (Hexanes/Ethyl acetate = 20:1) and

in 93% ee. The ee was determined by GC HP Chiral column (20% Permethyated  $\beta$ -Cyclodextrin, 30m x 0.25 mm) after the hydrogenation of peroxide to the  $\beta$ -hydroxyl ketone [Inject Temp: 240 °C, FID Temp: 260 °C, Inlet pressure: 10 psi. Oven Temp: 50 °C, 5min, 5 °C/min to 100 °C, retention times: 101.0 min and 101.8 min].  $[\alpha]_{\text{D}}^{25} = 39.3$  ( $c = 0.61$ ,  $\text{CHCl}_3$ );  $^1\text{H NMR}$  (400 MHz,  $\text{CDCl}_3$ )  $\delta$  0.87(t,  $J = 6.4$  Hz, 3H), 1.20 (s, 9H), 1.26-1.54 (m, 8H), 2.19 (s, 3H), 2.43 (dd,  $J_1 = J_2 = 4.8$  Hz, 1H), 2.85 (dd,  $J_1 = J_2 = 6.8$  Hz, 1H), 4.37-4.41 (m, 1H);  $^{13}\text{C NMR}$  (100 MHz,  $\text{CDCl}_3$ )  $\delta$  13.98, 22.48, 25.25, 26.30, 30.93, 31.77, 33.00, 47.73, 80.18, 80.33, 207.82; IR (neat)  $\nu$  2932, 2862, 1716, 1460, 1363, 1197, 1054, 882. HRMS (ESI/[M+Na] $^+$ ) Calcd. for:  $\text{C}_{13}\text{H}_{26}\text{O}_3\text{Na}$  253.1780, found 253.1778.

(-) **6Da** was obtained as a colorless oil (61.3mg) in 90% yield and in 90% ee from a reaction catalyzed by QD-NH<sub>2</sub> (10 mol %) in toluene (0.3 ml) at 23 °C for 4h.  $[\alpha]_{\text{D}}^{25} = -41.4$  ( $c = 0.49$ ,  $\text{CHCl}_3$ ).

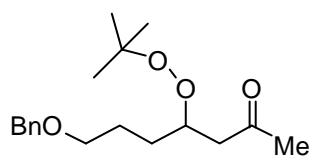

**6Ea** was obtained as a colorless oil (60.0 mg) in 65% yield after flash chromatography (Hexanes/Ethyl acetate=10:1) and in 91% ee determined by HPLC [Daicel Chiralcel AD, Hexanes / IPA = 99.5:0.5, 0.6 mL/min,  $\lambda = 220$  nm, 20.0 °C,  $t_r$  (major) = 14.71 min,  $t_r$  (minor) = 16.15 min].  $[\alpha]_{\text{D}}^{25} = 35.1$  ( $c = 0.56$ ,  $\text{CHCl}_3$ );  $^1\text{H NMR}$  (400 MHz,  $\text{CDCl}_3$ )  $\delta$  1.20 (s, 9H), 1.60-1.72 (m, 4H), 2.19 (s, 3H), 2.44 (dd,  $J_1 = 4.8$  Hz,  $J_2 = 5.6$  Hz, 1H), 2.88 (dd,  $J_1 = J_2 = 6.8$  Hz, 1H), 3.46-3.49 (m, 2H), 4.41-4.45 (m, 1H), 4.50 (s, 2H), 7.26-7.28 (m, 2H), 7.29-7.33 (m, 3H).  $^{13}\text{C NMR}$  (100 MHz,  $\text{CDCl}_3$ )  $\delta$  26.18, 26.61, 30.05, 31.18, 47.93, 70.40, 73.17, 80.08, 80.66, 127.76, 127.87, 128.59, 138.70, 207.77; IR (neat)  $\nu$  2978, 2935, 2859, 1715, 1454, 1363, 1197, 1101, 1028, 883, 738, 699; HRMS (ESI/[M+Na] $^+$ ) Calcd. for:  $\text{C}_{18}\text{H}_{28}\text{O}_4\text{Na}$  331.1885, found 331.1883.

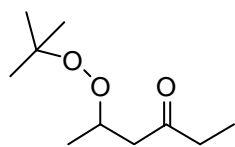

**6Fa** was obtained as a colorless oil (51.2 mg) in 90% yield after

flash chromatography (Hexanes/Ethyl acetate = 20:1) and in 89% ee. The ee was determined by GC HP Chiral column (20% Permethyated  $\beta$ -Cyclodextrin, 30m x 0.25 mm) after the hydrogenation of the peroxide to the  $\beta$ -hydroxyl ketone followed by the converting the hydroxyl group to the corresponding acetate form [Inject Temp: 250 °C, FID Temp: 220 °C, Inlet pressure: 13 psi., Oven Temp: 85 °C, retention times: 42.0 min and 42.6 min].  $[\alpha]_D^{25} = 10.4$  ( $c = 0.67$ ,  $\text{CHCl}_3$ );  $^1\text{H NMR}$  (400 MHz,  $\text{CDCl}_3$ )  $\delta$  1.03(t,  $J = 7.2$  Hz, 3H), 1.17 (s, 3H), 1.19 (s, 9H), 2.37 (dd,  $J_1 = 5.2$  Hz,  $J_2 = 5.6$  Hz, 1H), 2.40-2.51 (m, 2H), 2.83 (dd,  $J_1 = J_2 = 6.8$  Hz, 1H), 4.47-4.50 (m, 1H);  $^{13}\text{C NMR}$  (100 MHz,  $\text{CDCl}_3$ )  $\delta$  7.55, 18.50, 26.25, 36.90, 47.68, 76.36, 80.22, 209.77; IR (neat)  $\nu$  2963, 2931, 2862, 1716, 1506, 1456, 1365, 1230, 1040, 884; HRMS (ESI/[M+Na] $^+$ ) Calcd. for:  $\text{C}_{10}\text{H}_{20}\text{O}_3\text{Na}$  211.1310, found 211.1303.

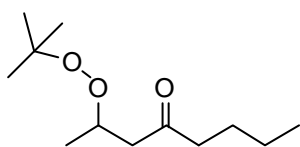

**6Ha** was obtained as a colorless oil (61.2 mg) in 94% yield after flash chromatography (Hexanes/Ethyl acetate = 20:1) and in 87% ee. The ee was determined by GC HP Chiral column (20% Permethyated  $\beta$ -Cyclodextrin, 30m x 0.25 mm) after the hydrogenation of the peroxide to the  $\beta$ -hydroxyl ketone followed by the converting the hydroxyl group to the corresponding acetate form [Inject Temp: 250 °C, FID Temp: 220 °C, Inlet pressure: 13 psi., Oven Temp: 110 °C, retention times: 35.7 min and 37.6 min].  $[\alpha]_D^{25} = 10.4$  ( $c = 0.52$ ,  $\text{CHCl}_3$ );  $^1\text{H NMR}$  (400 MHz,  $\text{CDCl}_3$ )  $\delta$  0.89 (t,  $J = 7.2$  Hz, 3H), 1.18 (s, 3H), 1.20 (s, 9H), 1.25-1.33 (m, 2H), 1.50-1.56 (m, 2H), 2.37 (dd,  $J_1 = J_2 = 6.0$  Hz, 1H), 2.42-2.48 (m, 2H), 2.85 (dd,  $J_1 = 6.4$  Hz,  $J_2 = 6.8$  Hz 1H), 4.47-4.50 (m, 1H);  $^{13}\text{C NMR}$  (100 MHz,  $\text{CDCl}_3$ )  $\delta$  13.84, 18.51, 22.26, 25.64, 26.28, 43.53, 47.90, 76.25, 80.22, 209.45; IR (neat)  $\nu$  2977, 2935, 2875, 1715, 1459, 1410, 1364, 1198, 1143, 1028, 864; HRMS (ESI/[M+Na] $^+$ ) Calcd. for:  $\text{C}_{12}\text{H}_{24}\text{O}_3\text{Na}$  239.1623, found 239.1615.

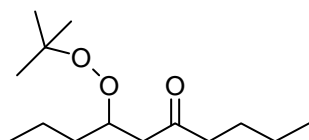

**6Ia(+)** was obtained as a colorless oil (57.1 mg) in 64%

yield after flash chromatography(Hexanes/Ethyl acetate = 20:1) and in 94% ee. The ee was determined by the HPLC [Daicel Chiralcel AD-H, Hexanes / IPA = 99.2:0.8, 0.78 mL/min,  $\lambda$  = 220 nm, 20.0 °C,  $t_r$ (major) = 16.95 min,  $t_r$ (minor) = 19.46 min] after the hydrogenation of the peroxide to the  $\beta$ -hydroxyl ketone followed by the converting the hydroxyl group to the corresponding 4-chlorobenzylacetate form.  $[\alpha]_D^{25}$  = 26.8 ( $c$  = 0.40,  $\text{CHCl}_3$ );  $^1\text{H NMR}$  (400 MHz,  $\text{CDCl}_3$ )  $\delta$  0.87(t,  $J$  = 6.4 Hz, 3H), 1.04 (t,  $J$  = 7.2 Hz, 3H), 1.20 (s, 9H), 1.26-1.53 (m, 8H), 2.39 (dd,  $J_1$  = 4.8 Hz,  $J_2$  = 5.6 Hz, 1H), 2.45-2.55 (m, 2H), 2.83 (dd,  $J_1 = J_2 = 6.8$  Hz, 1H), 4.37-4.42 (m, 1H);  $^{13}\text{C NMR}$  (100 MHz,  $\text{CDCl}_3$ )  $\delta$  13.86, 14.11, 18.90, 22.28, 25.35, 26.31, 35.32, 43.51, 46.75, 80.03, 80.28, 209.95; IR (neat)  $\nu$  2961, 2935, 2874, 1714, 1465, 1363, 1198, 1050, 884; HRMS (ESI/[ $\text{M}+\text{Na}$ ] $^+$ ) Calcd. For : $\text{C}_{14}\text{H}_{28}\text{O}_3\text{Na}$  267.1936, found 267.1933.

**6la(-)** was obtained as a colorless oil (62.1 mg) in 77% yield and in 88% ee from a reaction catalyzed by QD-NH<sub>2</sub> (10% mol) in toluene (0.3 ml) at 20.0 °C for 4h.

## 2. General procedure for peroxidation of enones with cumene hydroperoxide.

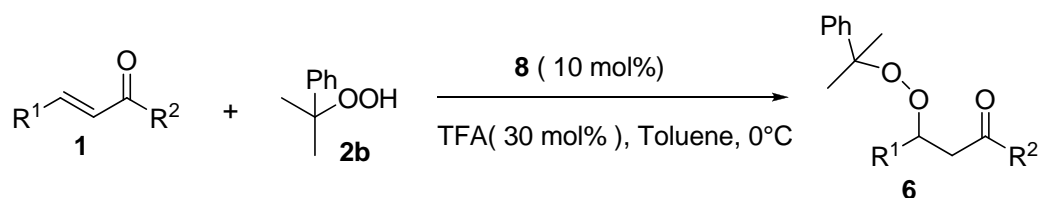

To a solution of enone **1** (0.3 mmol) catalyst **8** (0.03 mmol, 10 mol%) and trifluoroacetic acid (6.9  $\mu\text{L}$ , 0.09 mmol, 30 mol%) in toluene (0.3 ml) at zero degree was added cumene hydroperoxide **2b** (0.36 mmol, 1.2 equiv.). The reaction mixture was kept at zero degree overnight then passed through a short plug of silica gel for removal of the catalyst. The silica gel plug was washed with diethyl ether, eluent was concentrated in *vacuo*, and the residue was subjected to silica gel flash chromatography. The racemic product for the HPLC or GC analysis was prepared by mixing the Q-NH<sub>2</sub> and QD-NH<sub>2</sub> catalyzed product.

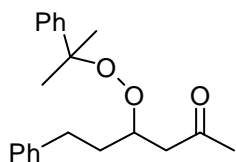

**6Ab** was obtained as a colorless oil (69.5 mg) in 74% yield after flash chromatography (Hexanes/Ethyl acetate = 20:1) and in 94% ee determined by HPLC [Daicel Chiralcel AS-H, Hexane / IPA = 99:1, 1.0 mL/min,  $\lambda$  = 220 nm, 20.0 °C,  $t_r$ (major) = 10.53 min,  $t_r$ (minor) = 9.31 min].  $[\alpha]_D^{25}$  = 35.9 ( $c$  = 0.44, CHCl<sub>3</sub>); <sup>1</sup>H NMR (400 MHz, CDCl<sub>3</sub>)  $\delta$  1.56 (s, 3H), 1.58 (s, 3H), 1.69-1.81 (m, 2H), 2.09 (s, 3H), 2.45 (dd,  $J_1 = J_2 = 4.8$  Hz, 1H), 2.49-2.62 (m, 2H), 2.87 (dd,  $J_1 = J_2 = 6.0$  Hz, 1H), 4.39-4.45 (m, 1H), 7.08-7.16 (m, 3H), 7.22-7.27 (m, 3H), 7.30-7.34 (m, 2H), 7.37-7.47 (m, 2H); <sup>13</sup>C NMR (100 MHz, CDCl<sub>3</sub>)  $\delta$  26.43, 26.64, 30.82, 31.67, 34.61, 47.55, 79.44, 82.90, 125.57, 125.82, 127.13, 128.00, 128.29, 128.33, 141.47, 145.21, 207.33; IR (neat)  $\nu$  2983, 2926, 1706, 1496, 1448, 1376, 1362, 1267, 1155, 838, 764, 700; HRMS (ESI/[M+Na]<sup>+</sup>) Calcd. for: C<sub>21</sub>H<sub>26</sub>O<sub>3</sub>Na 349.1780, found 349.1777.

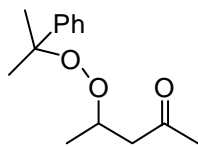

**6Bb** was obtained as a colorless oil (48.0 mg) in 70% yield after flash chromatography (Hexanes/Ethyl acetate = 20:1) and in 92% ee determined by HPLC [Daicel Chiralcel AS-H, Hexane / IPA = 99:1, 1.0 mL/min,  $\lambda$  = 220 nm, 20.0 °C,  $t_r$ (major) = 11.86 min,  $t_r$ (minor) = 10.36 min].  $[\alpha]_D^{25}$  = 22.4 ( $c$  = 0.17, CHCl<sub>3</sub>); <sup>1</sup>H NMR (400 MHz, CDCl<sub>3</sub>)  $\delta$  1.17 (d,  $J$  = 6.4 Hz, 3H), 1.58 (s, 3H), 1.62 (s, 3H), 2.11 (s, 3H), 2.40 (dd,  $J_1 = 6.0$  Hz,  $J_2 = 6.4$  Hz, 1H), 2.83 (dd,  $J_1 = J_2 = 6.4$  Hz, 1H), 4.47-4.52 (m, 1H), 7.25-7.35 (m, 3H), 7.43-7.46 (m, 2H); <sup>13</sup>C NMR (100 MHz, CDCl<sub>3</sub>)  $\delta$  18.58, 26.33, 26.65, 30.79, 48.88, 76.18, 82.86, 125.49, 127.06, 127.99, 145.25, 207.20; IR (neat)  $\nu$  2981, 2927, 2858, 1716, 1497, 1448, 1378, 1362, 1266, 1165, 1142, 1075, 1030, 857, 763, 700; HRMS (ESI/[M+Na]<sup>+</sup>) Calcd. for: C<sub>14</sub>H<sub>20</sub>O<sub>3</sub>Na 229.1310, found 229.1300.

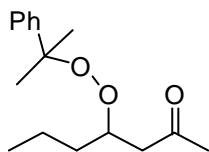

**6Cb** was obtained as a colorless oil (59.0 mg) in 75% yield after flash chromatography (Hexanes/Ethyl acetate = 20:1) and in 92% ee determined by HPLC [Daicel Chiralcel AS-H, Hexanes / IPA = 99:1, 1.0 mL/min,  $\lambda$  = 220 nm, 20.0 °C,  $t_r$ (major) = 6.55 min,  $t_r$ (minor) = 7.07 min].

$[\alpha]_{\text{D}}^{25} = 40.9$  ( $c = 0.53$ ,  $\text{CHCl}_3$ );  $^1\text{H NMR}$  (400 MHz,  $\text{CDCl}_3$ )  $\delta$  0.89 (t,  $J = 7.2$  Hz, 3H), 1.20-1.51 (m, 4H), 1.57 (s, 6H), 2.14 (s, 3H), 2.44 (dd,  $J_1 = 5.2$  Hz,  $J_2 = 5.6$  Hz, 1H), 2.84 (dd,  $J_1 = J_2 = 6.4$  Hz, 1H), 4.36-4.40 (m, 1H), 7.24-7.35 (m, 3H), 7.42-7.45 (m, 2H);  $^{13}\text{C NMR}$  (100 MHz,  $\text{CDCl}_3$ )  $\delta$  13.97, 18.71, 26.47, 26.50, 30.87, 35.11, 47.72, 79.88, 80.85, 125.51, 127.02, 127.93, 145.26, 207.66; IR (neat)  $\nu$  2960, 2931, 2874, 1716, 1496, 1448, 1379, 1362, 1266, 1164, 1137, 1030, 848, 763, 700; HRMS (ESI/[M+Na] $^+$ ) Calcd. for:  $\text{C}_{16}\text{H}_{24}\text{O}_3\text{Na}$  287.1623, found 287.1618.

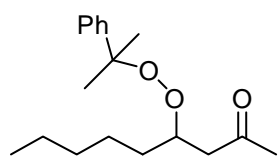

**6Db** was obtained as a colorless oil (86.7 mg) in 77% yield after flash chromatography (Hexanes/Ethyl acetate = 20:1) and in 95% ee determined by HPLC [Daicel Chiralcel AS-H, Hexanes / IPA = 99:1, 1.0 mL/min,  $\lambda = 220$  nm, 20.0 °C,  $t_{\text{r}}$ (major) = 7.13 min,  $t_{\text{r}}$ (minor) = 6.85 min].  $[\alpha]_{\text{D}}^{25} = 35.1$  ( $c = 1.06$ ,  $\text{CHCl}_3$ );  $^1\text{H NMR}$  (400 MHz,  $\text{CDCl}_3$ )  $\delta$  0.85 (t,  $J = 6.8$  Hz, 3H), 1.18-1.50 (m, 8H), 1.56 (s, 3H), 1.57 (s, 3H), 2.14 (s, 3H), 2.44 (dd,  $J_1 = 4.8$  Hz,  $J_2 = 5.2$  Hz, 1H), 2.83 (dd,  $J_1 = 6.0$  Hz,  $J_2 = 6.8$  Hz 1H), 4.35-4.40 (m, 1H), 7.23-7.27 (m, 1H), 7.31-7.35 (m, 2H), 7.43-7.45 (m, 2H);  $^{13}\text{C NMR}$  (100 MHz,  $\text{CDCl}_3$ )  $\delta$  13.95, 22.46, 25.09, 26.43, 26.55, 30.87, 31.64, 32.90, 47.72, 80.10, 82.84, 125.53, 127.04, 127.93, 145.26, 207.70; IR (neat)  $\nu$  2932, 2958, 2861, 1716, 1496, 1448, 1376, 1361, 1266, 1162, 867, 763, 700; HRMS (ESI/[M+Na] $^+$ ) Calcd. for:  $\text{C}_{18}\text{H}_{28}\text{O}_3\text{Na}$  315.1936, found 315.1932.

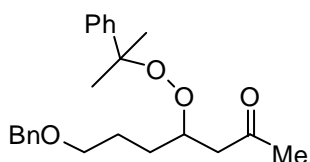

**6Eb** was obtained as a colorless oil (90.0 mg) in 82% yield after flash chromatography (Hexanes/Ethyl acetate = 10:1) and in 96% ee determined by HPLC [Daicel Chiralcel AS-H, Hexanes / IPA = 99:1, 1 mL/min,  $\lambda = 220$  nm, 20.0 °C,  $t_{\text{r}}$ (major) = 18.07 min,  $t_{\text{r}}$ (minor) = 19.15 min].  $[\alpha]_{\text{D}}^{25} = 17.2$  ( $c = 1.41$ ,  $\text{CHCl}_3$ );  $^1\text{H NMR}$  (400 MHz,  $\text{CDCl}_3$ )  $\delta$  1.55 (s, 3H), 1.57 (s, 3H), 1.57-1.63 (m, 4H), 2.13 (s, 3H), 2.44 (dd,  $J_1 = J_2 = 5.6$  Hz, 1H), 2.85 (dd,  $J_1 = J_2 = 6.8$  Hz, 1H), 3.35-3.38 (m, 2H), 4.36-4.42 (m, 1H), 4.44 (s, 2H),



7.25-7.38 (m, 5H), 7.42-7.56 (m, 5H);  $^{13}\text{C}$  NMR (100 MHz,  $\text{CDCl}_3$ )  $\delta$  25.68, 26.41, 26.58, 29.63, 29.68, 30.85, 31.74, 47.63, 69.98, 72.79, 79.76, 82.90, 125.53, 127.07, 127.49, 127.61, 127.96, 128.33, 138.50, 145.22, 207.45; IR (neat)  $\nu$  2981, 2934, 2867, 1715, 1496, 1449, 1376, 1362, 1273, 1159, 1103, 1075, 1029, 862, 764, 700; HRMS (ESI/[M+Na] $^+$ ) Calcd. for:  $\text{C}_{23}\text{H}_{30}\text{O}_4\text{Na}$  393.2042, found 393.2040.

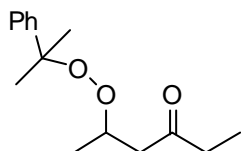

**6Fb** was obtained as a colorless oil (61.2 mg) in 75% yield after flash chromatography (Hexanes/Ethyl acetate = 20:1) and in 94% ee determined by HPLC [Daicel Chiralcel AD-H, AD, Hexanes / IPA = 99.7:0.3, 0.6 mL/min,  $\lambda$  = 220 nm, 20.0  $^\circ\text{C}$ ,  $t_r$ (major) = 24.93 min,  $t_r$ (minor) = 22.62 min].  $[\alpha]_{\text{D}}^{25}$  = 7.85 ( $c$  = 0.79,  $\text{CHCl}_3$ );  $^1\text{H}$  NMR (400 MHz,  $\text{CDCl}_3$ )  $\delta$  0.99(t,  $J$  = 7.2 Hz, 3H), 1.16(d,  $J$  = 6.4 Hz, 3H), 1.55 (s, 3H), 1.57 (s, 3H), 2.35 (dd,  $J_1$  = 6.0 Hz,  $J_2$  = 6.4 Hz, 1H), 2.39-2.47 (m, 2H), 2.80 (dd,  $J_1$  = 6.4 Hz,  $J_2$  = 6.8 Hz, 1H), 4.47-4.53 (m, 1H), 7.23-7.26 (m, 1H), 7.33-7.42 (m, 2H), 7.42-7.44 (m, 2H);  $^{13}\text{C}$  NMR (100 MHz,  $\text{CDCl}_3$ )  $\delta$  7.50, 18.62, 26.30, 26.59, 36.82, 47.68, 76.37, 80.81, 125.46, 127.01, 127.94, 145.23, 209.66; IR (neat)  $\nu$  2980, 2935, 1717, 1497, 1448, 1376, 1360, 1266, 1145, 1103, 928, 856, 764, 700; HRMS (ESI/[M+Na] $^+$ ) Calcd. for:  $\text{C}_{15}\text{H}_{22}\text{O}_3\text{Na}$  273.1454, found 273.1467.

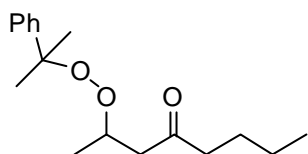

**6Hb** was obtained as a colorless oil (55.4 mg) in 65% yield after flash chromatography (Hexanes/Ethyl acetate = 20:1) and in 96% ee determined by HPLC [Daicel Chiralcel AD, AD-H, Hexanes / IPA = 99.5:0.5, 0.4 ml/min,  $\lambda$  = 220 nm, 20.0  $^\circ\text{C}$ ,  $t_r$ (major) = 36.66 min,  $t_r$ (minor) = 34.07 min].  $[\alpha]_{\text{D}}^{25}$  = 8.2 ( $c$  = 0.69,  $\text{CHCl}_3$ );  $^1\text{H}$  NMR (400 MHz,  $\text{CDCl}_3$ )  $\delta$  0.88(t,  $J$  = 7.2 Hz, 3H), 1.16 (d,  $J$  = 6.8 Hz, 3H), 1.22-1.31 (m, 2H), 1.43-1.51 (m, 2H), 1.56 (s, 3H), 1.58 (s, 3H), 2.35 (dd,  $J_1$  = 6.8 Hz,  $J_2$  = 7.2 Hz, 1H), 2.38-2.42 (m, 2H), 2.81 (dd,  $J_1$  = 6.0 Hz,  $J_2$  = 6.8 Hz, 1H), 4.48-4.53 (m, 1H), 7.23-7.26 (m, 1H), 7.31-7.35 (m, 2H), 7.43-7.45 (m, 2H);  $^{13}\text{C}$  NMR (100 MHz,  $\text{CDCl}_3$ )  $\delta$  13.84, 18.62,

22.24, 25.60, 26.38, 26.59, 43.48, 47.89, 76.29, 82.83, 125.46, 127.02, 127.95, 145.25, 209.37; IR (neat)  $\nu$  2959, 2935, 2872, 1717, 1459, 1448, 1410, 1376, 1363, 1266, 1144, 1031, 931, 854, 763, 699; HRMS (ESI/[M+Na]<sup>+</sup>) Calcd. for: C<sub>17</sub>H<sub>26</sub>O<sub>3</sub>Na 301.1780, found 301.1779.

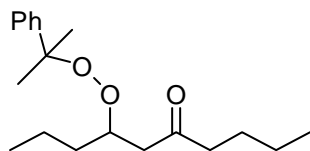

**6Ib** was obtained as a colorless oil (48.7 mg) in 55% yield after flash chromatography (Hexanes/Ethyl acetate =20:1) and in 97% ee determined by HPLC [Daicel Chiralcel AD, AD-H, Hexanes / IPA = 99.5:0.5, 0.4 mL/min,  $\lambda$  = 220 nm, 20.0 °C,  $t_r$ (major) = 33.14 min,  $t_r$ (minor) = 30.76 min].  $[\alpha]_D^{25}$  = 16.2 ( $c$  = 0.37, CHCl<sub>3</sub>); <sup>1</sup>H NMR (400 MHz, CDCl<sub>3</sub>)  $\delta$  0.82 (t,  $J$  = 6.8Hz, 3H), 0.89 (t,  $J$  = 7.2Hz, 3H), 1.16-1.53 (m, 8H), 1.57 (s, 6H), 2.39 (dd,  $J_1$  = 5.6 Hz,  $J_2$  = 6.4 Hz, 1H), 2.42-2.47 (m, 2H), 2.82(dd,  $J_1$  = 6.0 Hz,  $J_2$  = 6.8 Hz, 1H), 4.38-4.44 (m, 1H), 7.23-7.26 (m, 1H), 7.31-7.34 (m, 2H), 7.42-7.44 (m, 2H); <sup>13</sup>C NMR (100 MHz, CDCl<sub>3</sub>)  $\delta$  13.87, 14.00, 18.72, 22.27, 25.62, 26.44, 26.56, 35.21, 43.54, 46.76, 79.98, 82.84, 125.53, 127.01, 127.91, 145.26, 209.85; IR (neat)  $\nu$  2960, 2874, 1715, 1496, 1449, 1378, 1360, 1266, 1157, 855, 763, 700; HRMS (ESI/[M+Na]<sup>+</sup>) Calcd. For : C<sub>19</sub>H<sub>30</sub>O<sub>3</sub>Na 329.2093, found 329.2083.

### 3. General procedure for peroxidation of enones the conjugate addition between the enones and the 2-hydroperoxy-2-methoxypropane:

To a solution of enone **1** (0.3 mmol) catalyst **8** (0.03 mmol, 10 mol%) and trifluoroacetic acid ( 4.6 $\mu$ L, 0.06mmol, 20 mol%)in toluene (0.3 ml) was added 2-hydroperoxy-2-methoxypropane **2c** (0.36 mmol, 5M in toluene, 1.2 equiv.). The reaction mixture was kept overnight then passed through a short plug of silica gel for removal of the catalyst. The silica gel plug was washed with diethyl ether, eluent was concentrated in *vacuo*, and the residue was subjected to silica gel flash chromatography. The racemic product for the HPLC or GC analysis was prepared by mixing the Q-NH<sub>2</sub> and QD-NH<sub>2</sub> catalyzed product.

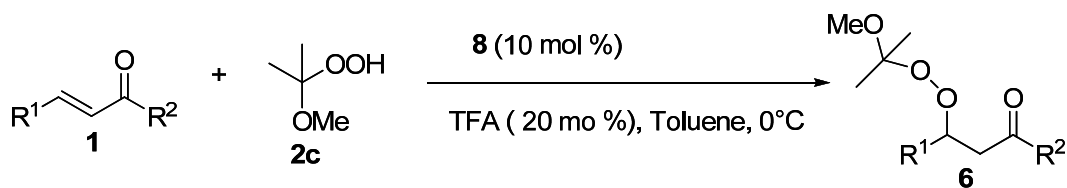

**6Ac** was obtained as a colorless oil (52.1 mg) in 62% yield after flash chromatography (Hexanes/Ethyl acetate = 10:1) and in 92% ee determined by HPLC [Daicel Chiralcel AD-H, Hexanes / IPA = 99:1, 1 mL/min,  $\lambda = 220$  nm, 20.0 °C,  $t_r$ (major) = 11.68 min,  $t_r$ (minor) = 12.96 min].  $[\alpha]_D^{25} = 38.4$  ( $c = 1.15$ ,  $\text{CHCl}_3$ );  $^1\text{H NMR}$  (400 MHz,  $\text{CDCl}_3$ )  $\delta$  1.38 (s, 6H), 1.83-1.93 (m, 2H), 2.19 (s, 3H), 2.53 (dd,  $J_1 = J_2 = 5.6$  Hz, 1H), 2.68-2.74 (m, 1H), 2.77-2.81 (m, 1H), 2.91 (dd,  $J_1 = J_2 = 6.0$  Hz, 1H), 3.29 (s, 3H), 4.49-4.53 (m, 1H), 7.16-7.21 (m, 3H), 7.26-7.30 (m, 2H);  $^{13}\text{C NMR}$  (100 MHz,  $\text{CDCl}_3$ )  $\delta$  22.68, 22.87, 30.78, 31.72, 34.65, 47.49, 49.30, 79.42, 104.73, 125.90, 128.34, 128.38, 141.56, 206.97; IR (neat)  $\nu$  2994, 2944, 1715, 1604, 1496, 1455, 1381, 1368, 1262, 1210, 1183, 1153, 1071, 842, 749, 700; HRMS (ESI/[M+Na] $^+$ ) Calcd. for:  $\text{C}_{16}\text{H}_{24}\text{O}_4\text{Na}$  303.1572, found 303.1560.

**6Cc** was obtained as a colorless oil (44.8 mg) in 70% yield after flash chromatography (Hexanes/Ethyl acetate = 10:1) and in 95% ee. The ee was determined by GC HP Chiral (20% Permethyated  $\beta$ -Cyclodextrin, 30m x 0.25 mm) after hydrogenation of peroxide to the  $\beta$ -hydroxyl ketone [Inject Temp: 240 °C, Fid Temp: 260 °C, Inlet pressure: 10 psi. Oven Temp: 50 °C, 5min, 2.5°C/min to 100°C, retention times: 38.0min and 38.3min].  $[\alpha]_D^{25} = 23.1$  ( $c = 1.0$ ,  $\text{CHCl}_3$ );  $^1\text{H NMR}$  (400 MHz,  $\text{CDCl}_3$ )  $\delta$  0.95 (t,  $J = 6.8$  Hz, 3H), 1.26 (s, 3H), 1.37 (s, 3H), 1.40-1.58 (m, 4H), 2.22 (s, 3H), 2.50 (dd,  $J_1 = 5.2$  Hz,  $J_2 = 5.6$  Hz, 1H), 2.87 (dd,  $J_1 = J_2 = 6.8$  Hz, 1H), 3.29 (s, 3H), 4.46-4.50 (m, 1H);  $^{13}\text{C NMR}$  (100 MHz,  $\text{CDCl}_3$ )  $\delta$  13.95, 18.78, 22.61, 22.74, 30.80, 35.06, 47.62, 49.21, 79.91, 104.61, 207.29; IR (neat)  $\nu$  2994, 2961, 1716, 1465, 1368, 1211, 1185, 1160, 1137, 1072, 839. HRMS (ESI/[M+Na] $^+$ ) Calcd. for:  $\text{C}_{11}\text{H}_{22}\text{O}_4\text{Na}$  241.1416, found 241.1410.

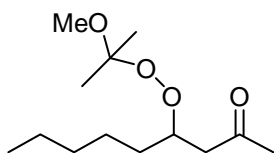

**6Dc** was obtained as a colorless oil (45.0 mg) in 62% yield after flash chromatography (Hexanes/Ethyl acetate = 20:1) and in 95% ee. The ee was determined by GC HP Chiral column (20% Permethyated  $\beta$ -Cyclodextrin, 30m x 0.25 mm) after the hydrogenation of peroxide to the  $\beta$ -hydroxyl ketone [ Inject Temp: 240 °C, Fid Temp: 260 °C, Inlet pressure: 10 psi. Oven Temp: 50 °C, 5 min, 5 °C/min to 100 °C, retention times: 82.9 min and 83.2 min].  $[\alpha]_D^{25} = 30.0$  ( $c = 1.0$ ,  $\text{CHCl}_3$ );  $^1\text{H NMR}$  (400 MHz,  $\text{CDCl}_3$ )  $\delta$  0.88(t,  $J = 6.4$  Hz, 3H), 1.37 (s, 6H), 1.40-1.59 (m, 8H), 2.21 (s, 3H), 2.50 (dd,  $J_1=4.8$  Hz,  $J_2=5.2$  Hz, 1H), 2.86 (dd,  $J_1 = J_2 = 6.8$  Hz, 1H), 3.29 (s, 3H), 4.44-4.49 (m, 1H);  $^{13}\text{C NMR}$  (100 MHz,  $\text{CDCl}_3$ )  $\delta$  13.98, 22.46, 22.65, 22.75, 25.13, 30.82, 31.68, 32.89, 47.61, 49.23, 80.14, 104.62, 207.33; IR (neat)  $\nu$  2999, 2935, 2858, 1716, 1465, 1368, 1265, 1211, 1072, 839; HRMS (ESI/[M+Na] $^+$ ) Calcd. for:  $\text{C}_{13}\text{H}_{26}\text{O}_4\text{Na}$  269.1729, found 269.1728.

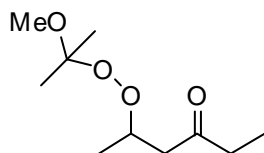

**6Fc** was obtained as a colorless oil (37.5 mg) in 63% yield after flash chromatography (Hexanes/Ethyl acetate = 20:1) and in 94% ee. The ee was determined by GC HP Chiral column (20% Permethyated  $\beta$ -Cyclodextrin, 30m x 0.25 mm) after the hydrogenation of the peroxide to the  $\beta$ -hydroxyl ketone followed by the converting the hydroxyl group to the corresponding acetate [ Inject Temp: 250 °C, Fid Temp: 220 °C, Inlet pressure: 13 psi., Oven Temp: 85 °C. retention times: 42.0 min and 42.6 min.].  $[\alpha]_D^{25} = 4.7$  ( $c = 1.0$ ,  $\text{CHCl}_3$ );  $^1\text{H NMR}$  (400 MHz,  $\text{CDCl}_3$ )  $\delta$  1.06 (t,  $J=7.2$  Hz, 3H), 1.24 (d,  $J = 6.0$  Hz, 3H), 1.36 (s, 3H), 1.37 (s, 3H), 2.44 (dd,  $J_1 = J_2 = 5.6$  Hz, 1H), 2.48-2.56 (m, 2H), 2.88 (dd,  $J_1 = 6.0$  Hz,  $J_2 = 6.4$  Hz, 1H), 3.29 (s, 3H), 4.50-4.62 (m, 1H);  $^{13}\text{C NMR}$  (100 MHz,  $\text{CDCl}_3$ )  $\delta$  7.58, 18.66, 22.65, 22.71, 36.86, 47.66, 49.25, 76.40, 104.58, 209.46; IR (neat)  $\nu$  2980, 2942, 2862, 1716, 1459, 1378, 1369, 1211, 1185, 1142, 1072, 930, 837; HRMS (ESI/[M+Na] $^+$ ) Calcd. for:  $\text{C}_{10}\text{H}_{20}\text{O}_4\text{Na}$  227.1259, found 227.1257.

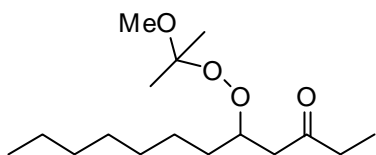

**6Gc** was obtained as a colorless oil (36.0 mg) in 41% yield after flash chromatography (Hexanes/Ethyl acetate = 10:1) and in 94% ee. The ee was determined by HPLC [ (R,R)Whelk-O 1, Hexanes / IPA = 99:1, 1 mL/min,  $\lambda$  = 220 nm, 20.0 °C,  $t_r$  (major) = 11.91min,  $t_r$  (minor) = 13.82 min] after the hydrogenation of the peroxide to the  $\beta$ -hydroxyl ketone followed by the converting the hydroxyl group to the corresponding benzylacetate form.  $[\alpha]_D^{25}$  = 15.8 ( $c$  = 1.0,  $\text{CHCl}_3$ );  $^1\text{H}$  NMR (400 MHz,  $\text{CDCl}_3$ )  $\delta$  0.87 (t,  $J$  = 6.4 Hz, 3H), 1.05 (t,  $J$  = 7.2 Hz, 3H), 1.42 (s, 3H), 1.43(s, 3H), 1.45-1.66 (m, 12H), 2.21 (dd,  $J_1$  = 7.2 Hz,  $J_2$  = 7.6 Hz, 1H), 2.28-2.60 (m, 2H), 2.84 (dd,  $J_1=J_2=6.4\text{Hz}$ , 1H), 3.28 (s, 3H), 4.44-4.50 (m, 1H);  $^{13}\text{C}$  NMR (100 MHz,  $\text{CDCl}_3$ )  $\delta$  7.59, 14.07, 22.60, 22.65, 22.79, 25.51, 29.13, 29.49, 30.92, 31.76, 33.05, 36.85, 46.48, 49.23, 80.37, 104.61, 209.90; IR (neat)  $\nu$  2929, 2858, 1716, 1460, 1368, 1211, 1183, 1153, 1113, 1073, 835; HRMS (ESI/[ $\text{M}+\text{Na}$ ] $^+$ ) Calcd. for:  $\text{C}_{16}\text{H}_{32}\text{O}_4\text{Na}$  311.2198, found 311.2201.

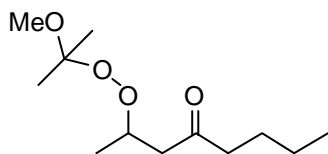

**6Hc** was obtained as a colorless oil(41.0 mg) in 60% yield after flash chromatography (Hexanes/Ethyl acetate = 20:1) and in 94% ee. The ee was determined by GC HP Chiral column (20% Permethyated  $\beta$ -Cyclodextrin, 30m x 0.25 mm) after the hydrogenation of the peroxide to the  $\beta$ -hydroxyl ketone followed by the converting the hydroxyl group to the acetate form [ Inject Temp: 250 °C, Fid Temp: 220 °C, Inlet pressure: 13 psi, Oven Temp: 110 °C, retention times: 37.5 min and 39.1 min].  $[\alpha]_D^{25}$  = 14.1 ( $c$  = 1.0,  $\text{CHCl}_3$ );  $^1\text{H}$  NMR (400 MHz,  $\text{CDCl}_3$ )  $\delta$  0.91(t,  $J$  = 7.2 Hz, 3H), 1.23 (d,  $J$  = 6.0 Hz, 3H), 1.25-1.36 (m, 2H), 1.37 (s, 6H), ,1.52-1.58 (m, 2H), 2.43 (dd,  $J_1 = J_2 = 6.4$  Hz, 1H), 2.46-2.51 (m, 2H), 2.88 (dd,  $J_1 = 5.6$  Hz,  $J_2 = 6.0$  Hz, 1H), 3.29 (s, 3H), 4.55-4.62 (m, 1H);  $^{13}\text{C}$  NMR (100 MHz,  $\text{CDCl}_3$ )  $\delta$  13.84, 18.64, 22.25, 22.65, 22.72, 25.62, 43.44, 47.85, 49.23, 76.27, 104.55, 209.10; IR(neat)  $\nu$  2960, 2935, 1715, 1461, 1369, 1211, 1142, 1072, 932, 839;. HRMS (ESI/[ $\text{M}+\text{Na}$ ] $^+$ ) Calcd. for:  $\text{C}_{12}\text{H}_{24}\text{O}_4\text{Na}$

255.1572, found 255.1574.

#### 4. General procedure for the hydrogenation of Peroxide adducts:

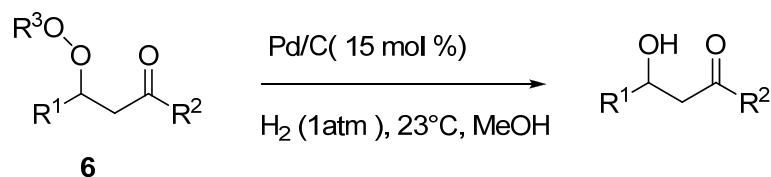

To a solution of peroxide **6** (0.1 mmol) in methanol (5ml) at room temperature, was added 15 mol % Pd/C (10 %). The reaction mixture was kept under hydrogen atmosphere for 4 h then passed through celite. The celite was washed with diethyl ether, the eluent was concentrated in *vacuo*, and the residue was subjected to silica gel flash chromatography.

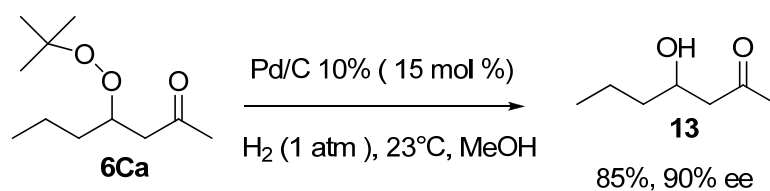

**13** was obtained as a colorless oil in 85% yield. The reaction mixture was stirred at 23 °C for 4h with 15% Pd/C (10 %) in methanol under the hydrogen atmosphere for 4 h, then passed through the celite. The celite was washed with diethyl ether, and the eluent was concentrated in *vacuo*, and the residue was subjected to silica gel flash chromatography (Hexanes/Ethyl acetate = 3:1) to get the product. The ee of the product is 90%, which was determined by GC HP Chiral column (20% Permethylated  $\beta$ -Cyclodextrin, 30m x 0.25 mm) [ Inject Temp: 240 °C, FId Temp: 260 °C, Inlet pressure: 10 psi. Oven Temp: 50 °C, 5 min, 2.5 °C/min to 100 °C, retention times: 38.0 min and 38.4 min].  $[\alpha]_D^{25} = -48.0$  ( $c = 0.38$ , CHCl<sub>3</sub>); <sup>1</sup>H NMR (400 MHz, CDCl<sub>3</sub>)  $\delta$  0.93 (t,  $J_1 = 7.2$  Hz, 3H), 1.26-1.54 (m, 4H), 2.19 (s, 3H), 2.53 (dd,  $J_1 = 8.4$  Hz,  $J_2 = 9.2$  Hz, 1H), 2.63 (dd,  $J_1 = 8.4$  Hz,  $J_2 = 9.2$  Hz, 1H), 2.97 (s, 1H), 4.03-4.06 (m, 1H). According to literature report  $\{([\alpha]_D^{25} = -49.6$  ( $c = 0.23$ , CHCl<sub>3</sub>)<sup>4</sup>, the absolute configuration of **13** is *R*, therefore, the absolute configuration of **6Ca** is also *R*.

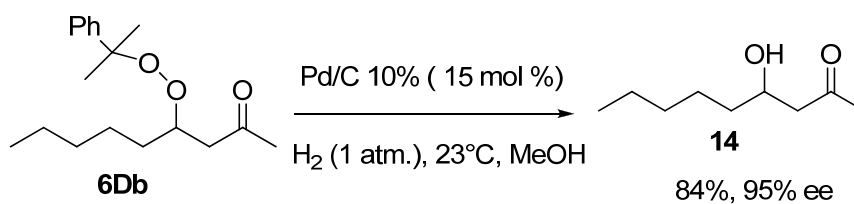

**14** was obtained as a colorless oil in 84% yield. The reaction mixture was stirred at 23 °C for 4h with 15% Pd/C (10 %) in methanol under the hydrogen atmosphere for 4 h, then passed through the celite. The celite was washed with diethyl ether, and the eluent was concentrated in vacuo, and the residue was subjected to silica gel flash chromatography (Hexanes/Ethyl acetate=3:1) to get the product. The ee of the product is 90%, which was determined by GC HP Chiral column (20% Permethyated  $\beta$ -Cyclodextrin, 30m x 0.25 mm) [ Inject Temp: 240 °C, FID Temp: 260°C, Inlet pressure 10 psi. Oven Temp: 50°C, 5min, 5°C/min to 100 °C, retention times: 101.0 min and 101.8 min].  $[\alpha]_D^{25} = -48$  ( $c = 0.38$ ,  $\text{CHCl}_3$ ).  $^1\text{H}$  (400 MHz,  $\text{CDCl}_3$ )  $\delta$  0.89(t,  $J_1 = 6.8$  Hz, 3H), 1.30-1.51 (m, 8H), 2.18 (s, 3H), 2.53 (dd,  $J_1 = J_2 = 9.2$  Hz, 1H), 2.63 (dd,  $J_1 = J_2 = 9.2$  Hz, 1H), 2.95 (s, 1H), 4.02-4.04 (m, 1H).

### 5. Transformation from peroxide to 1,2-Dioxolane.

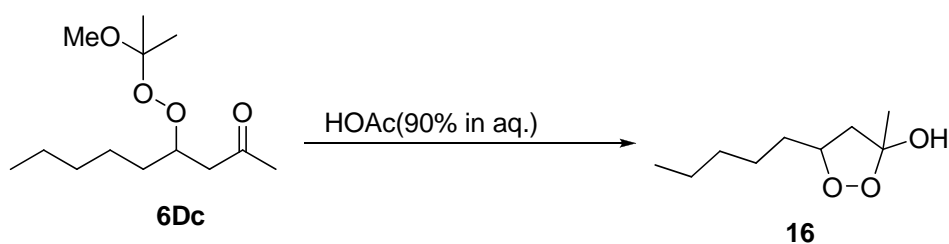

To a compound **6Dc** (100 mg, 0.41 mmol) was added 90% acetic acid in the water at room temperature. After stirring at room temperature for 1.5 h, the solvent was removed under reduced pressure. Compound **2** (56 mg, dr = 1 : 1) was obtained as a colorless oil by flash chromatography (silica gel: Hexanes : EtOAc = 5 : 1). yield: 81%, the mixture of two diastereomer  $^1\text{H}$  NMR (400 MHz,  $\text{CDCl}_3$ )  $\delta$  0.87-0.90 (m, 6H)

1.26-1.71 (m, 22 H ), 2.20-2.33 (m, 2H), 2.66-2.71 (m, 1H), 2.80-2.85 (m, 2H), 4.33-4.36 (m, 1H), 4.42-4.46 (m, 1H).

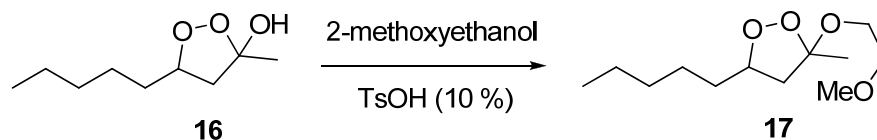

TsOH (5 mg) was added to the compound **16** ( 56 mg, 0.32 mmol ) in 3 mL 2-methoxyethanol, After stirred at room temperature for 24 hrs, the solvent was removed under reduced pressure. Compound **17** (57 mg, dr = 1 : 1) was obtained as a colorless oil by flash chromatography (silica gel: Hexanes : EtOAc = 7 : 1). yield: 75 %, one diastereomer **17a**  $^1\text{H NMR}$  (400 MHz,  $\text{CDCl}_3$ )  $\delta$  0.88(t,  $J = 6.8$  Hz, 3H), 1.29-1.71 (m, 11H), 2.15 (dd,  $J = 6.0$  Hz, 12.4 Hz, 1H), 2.89 (dd,  $J = 7.2$  Hz, 12.0 Hz, 1H), 3.39 (s, 3H), 3.50-3.77 (m, 4H), 4.42-4.45 (m, 1H). The other diastereomer **17b**  $^1\text{H NMR}$  (400 MHz,  $\text{CDCl}_3$ )  $\delta$  0.88(t,  $J = 6.0$  Hz, 3H), 1.29-1.71 (m, 11H), 2.43 (dd,  $J = 8.8$  Hz, 12.8 Hz, 1H), 2.57 (dd,  $J = 8.0$  Hz, 12.8 Hz, 1H), 3.40 (s, 3H), 3.47-3.76 (m, 4H), 4.29-4.36 (m, 1H).

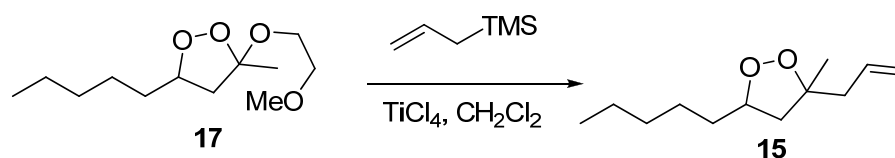

Under Argon atmosphere,  $\text{TiCl}_4$  ( 0.27 ml, 1 M in  $\text{CH}_2\text{Cl}_2$ ) was added to the compound **17** ( 55 mg, 0.24 mmol ) and allyltrimethylsilane ( 114  $\mu\text{L}$ , 0.71 mmol) in 2 mL  $\text{CH}_2\text{Cl}_2$  at  $-78^\circ\text{C}$ , After stirred for 30 min, the reaction was quenched by saturate  $\text{NaHCO}_3$ , the mixture was allowed to warm up to room temperature and was extracted with ethyl acetate (5 mL X 3). The organic phase was collected together and dried over  $\text{Na}_2\text{SO}_4$ . The solvent was removed in *vacuo* to afford a light yellow oil. **15** ( 24 mg ) by flash chromatography (silica gel: Hexanes : EtOAc = 7 : 1). dr = 4 : 1, yield: 47 %, the major :  $^1\text{H NMR}$  (400 MHz,  $\text{CDCl}_3$ )  $\delta$  0.89 (t,  $J = 6.4$  Hz, 1H), 1.21-1.55 (m, 7H),



1.33 (s, 3H), 1.64-1.70 (m, 1H), 1.87 (dd,  $J = 6.8$  Hz, 11.6 Hz, 1H), 2.31-2.37 (m, 2H), 2.55 (dd,  $J = 6.8$  Hz, 11.6 Hz, 1H), 4.19-4.26 (m, 1H), 5.09-5.13 (m, 2H), 5.76-5.87 (m, 1H). the minor :  $^1\text{H}$  NMR (400 MHz,  $\text{CDCl}_3$ )  $\delta$  1.21-1.55 (m, 10H), 1.29 (s, 3H), 1.64-1.70 (m, 1H), 2.07 (dd,  $J = 8$  Hz, 19.6 Hz, 1H), 2.27-2.46 (m, 3H), 4.19-4.29 (m, 1H), 5.09-5.13 (m, 2H), 5.76-5.87 (m, 1H).; HRMS (ESI/[ $\text{M}+\text{Na}$ ] $^+$ ) Calcd. for:  $\text{C}_{12}\text{H}_{22}\text{O}_2$ : 221.1517, Found: 221.1506.

## 6. General procedure for epoxidation of the enones with cumene hydroperoxide

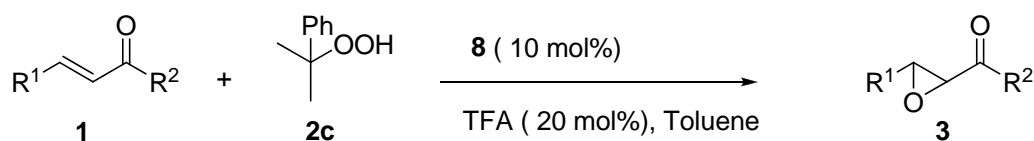

To a solution of Enone **1** (0.3 mmol) catalyst **8** (0.03 mmol, 10 mol %) and trifluoroacetic acid (4.6  $\mu\text{L}$ , 0.06 mmol, 20 mol%) in toluene at room temperature (0.3 ml) was added **2c** (0.36 mmol, 1.2 equiv.). The reaction mixture was kept at certain temperature for 24-72h then passed through a short plug of silica gel for removal of the catalyst. The silica gel plug was washed with diethyl ether, the eluent was concentrated *in vacuo*, and the residue was subjected to silica gel flash chromatography. The racemic product was prepared according to literature methods<sup>5</sup>.

**3Ab** was obtained as a colorless oil (49.9mg) in 88% yield after flash chromatography (Hexanes/Ethyl acetate = 10:1) and in 97% ee [determined by HPLC Daicel Chiralcel AD-H, Hexanes / IPA = 99:1, 1 mL/min,  $\lambda = 220$  nm, 20.0  $^\circ\text{C}$ ,  $t_r$ (major) = 19.84 min,  $t_r$ (minor) = 12.65 min].  $[\alpha]_{\text{D}}^{25} = -15.6$  ( $c = 0.51$ ,  $\text{CHCl}_3$ );  $^1\text{H}$  NMR (400 MHz,  $\text{CDCl}_3$ )  $\delta$  1.93-1.98 (m, 2H), 2.01(s, 3H), 2.78-2.82 (m, 2H), 3.09-3.12 (m, 1H) 3.17 (s, 1H), 7.18-7.24 (m, 3H), 7.26-7.31 (m, 2H).

**3Cb** was obtained as a colorless oil (33.5 mg) in 91% yield after flash chromatography (Hexanes/Ethyl acetate = 30:1) and in 97% ee [determined by GC HP Chiral column (20% Permethylated  $\beta$ -Cyclodextrin, 30m x 0.25 mm) Inject Temp: 250  $^\circ\text{C}$ , FID Temp: 260  $^\circ\text{C}$ , Inlet pressure: 13 psi., Oven Temp:

90 °C, retention times: 16.44 min and 17.32 min].  $[\alpha]_{\text{D}}^{25} = -52.3$  ( $c = 0.91$ ,  $\text{CHCl}_3$ );  $^1\text{H}$  NMR (400 MHz,  $\text{CDCl}_3$ )  $\delta$  0.98 (t,  $J = 7.2$  Hz, 3H), 1.47-1.63 (m, 4H), 2.07 (s, 3H), 3.06-3.10 (m, 1H), 3.19 (d,  $J = 2$  Hz, 1H).

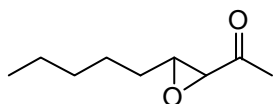

**3Db** was obtained as colorless oil (43.4 mg) in 91% yield after flash chromatography (Hexanes/Ethyl acetate = 30:1) and in 97% ee [determined by GC HP Chiral column (20% Permethyated  $\beta$ -Cyclodextrin, 30m x 0.25 mm) Inject Temp: 250 °C, FID Temp: 260 °C, Inlet pressure: 13 psi., Oven Temp: 102 °C retention times: 34.48 min and 35.60 min].  $[\alpha]_{\text{D}}^{25} = -44.3$  ( $c = 1.14$ ,  $\text{CHCl}_3$ );  $^1\text{H}$  NMR (400 MHz,  $\text{CDCl}_3$ )  $\delta$  0.90 (t,  $J = 6.8$  Hz, 3H), 1.43-1.49 (m, 4H), 1.55-1.66 (m, 4H), 2.06 (s, 3H), 3.0 (t,  $J = 4.8$  Hz, 1H), 3.18 (s, 1H). According to literature report  $\{[\alpha]_{\text{D}}^{25} = -38.7$  ( $c = 0.75$ ,  $\text{CHCl}_3$ ) $\}^6$ , the absolute configuration of **3Db** is (3*S*, 4*R*).

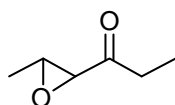

**3Fb** was obtained as colorless oil (19.5 mg) in 55% yield. The reaction mixture was heated at 55°C for 24h, then subjected to flash chromatography (Hexanes/Ethyl acetate = 30:1) to get the product. The ee of the product is 97%, which was determined by GC [HP Chiral column (20% Permethyated  $\beta$ -Cyclodextrin, 30m x 0.25 mm) Inject Temp: 250 °C, Fid Temp: 260 °C, Inlet pressure: 13psi., Oven Temp: 73 °C, retention times: 18.12 min and 19.40 min].  $[\alpha]_{\text{D}}^{25} = -13.8$  ( $c = 0.13$ ,  $\text{CHCl}_3$ );  $^1\text{H}$  NMR (400 MHz,  $\text{CDCl}_3$ )  $\delta$  1.05 (t,  $J = 7.6$  Hz, 3H), 1.23 (d,  $J = 4.8$  Hz, 3H), 2.27-2.37 (m, 1H), 2.42-2.51 (m, 1H), 3.12-3.3.15 (m, 1H), 3.19 (s, 1H).

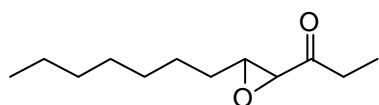

**3Gb** was obtained as colorless oil (33.2 mg) in 58% yield. The reaction mixture was heated at 55°C for 24h, then subjected to flash chromatography (Hexanes/Ethyl acetate = 30:1) to get the product. The ee of the product is 96%, which was determined by GC [HP Chiral

column (20% Permethyated  $\beta$ -Cyclodextrin, 30m x 0.25 mm) Inject Temp: 250 °C, FID Temp: 260 °C, Inlet pressure: 13 psi., Oven Temp: 115 °C, retention times: 97.74 min and 99.61 min].  $[\alpha]_D^{25} = -15.2$  ( $c = 0.50$ ,  $\text{CHCl}_3$ );  $^1\text{H NMR}$  (400 MHz,  $\text{CDCl}_3$ )  $\delta$  0.88 (t,  $J = 7.2$  Hz, 3H), 1.06 (t,  $J = 7.2$  Hz, 3H), 1.21-1.32 (m, 8H), 1.43-1.50 (m, 2H), 1.58-1.67 (m, 2H), 2.27-2.37 (m, 1H), 2.42-2.50 (m, 1H), 3.03-3.06 (m, 1H), 3.23 (s, 1H).

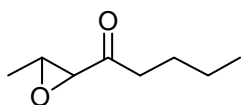

**3Hb** was obtained as colorless oil (32.5 mg) in 71% yield. The reaction mixture was heated at 55°C for 24h, then subjected to flash chromatography (Hexanes/Ethyl acetate = 30:1) to get the product. The ee of the product is 97%, which was determined by GC [HP Chiral column (20% Permethyated  $\beta$ -Cyclodextrin, 30m x 0.25 mm) Inject Temp: 250 °C, FID Temp: 260 °C, Inlet pressure: 13 psi., Oven Temp: 80 °C, retention times: 47.97 min and 49.11 min].  $[\alpha]_D^{25} = -19.0$  ( $c = 0.70$ ,  $\text{CHCl}_3$ );  $^1\text{H NMR}$  (400 MHz,  $\text{CDCl}_3$ )  $\delta$  0.90 (t,  $J = 6.8$  Hz, 3H), 1.26-1.36 (m, 3H), 1.40-1.43 (m, 2H), 1.51-1.58 (m, 2H), 2.26-2.32 (m, 1H), 2.39-2.46 (m, 1H), 3.13-3.3.14 (m, 1H), 3.18 (s, 1H).

#### References:

- (1) Singh, R. P.; Bartelson, K.B.; Wang, Y.; Su, H.; Lu, X.; Deng, L.; *J. Am. Chem. Soc.* **2008**, *30*, 2422.
- (2) Dussault, P.; Sahli, A.; *J. Org. Chem.* **1992**, *57*, 1009.
- (3) Vakulya, B.; Varga, S.; Csámpai, A.; Soós, T. *Org Lett.* **2005**, *7*, 1967.
- (4) Olivier, L; *ARKIVOC* (Gainesville, FL, United States) **2007**, P94-106.
- (5) Yadav, K.V.; Kaporr, K. K.; *Tetrahedron* **1995**, *51*, 8573.
- (6) Bougauchi, S.; Watanabe, T.; Arai, T; Sasai, H.; Shibasaki, M. *J. Am. Chem. Soc.* **1997**, *119*, 2329.

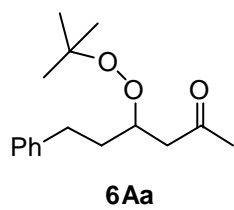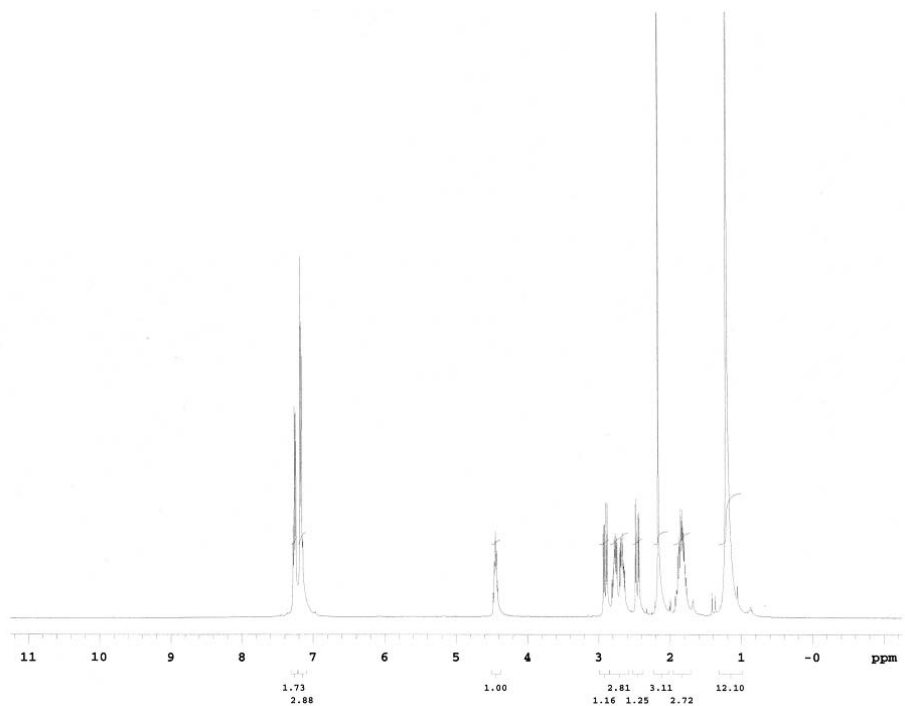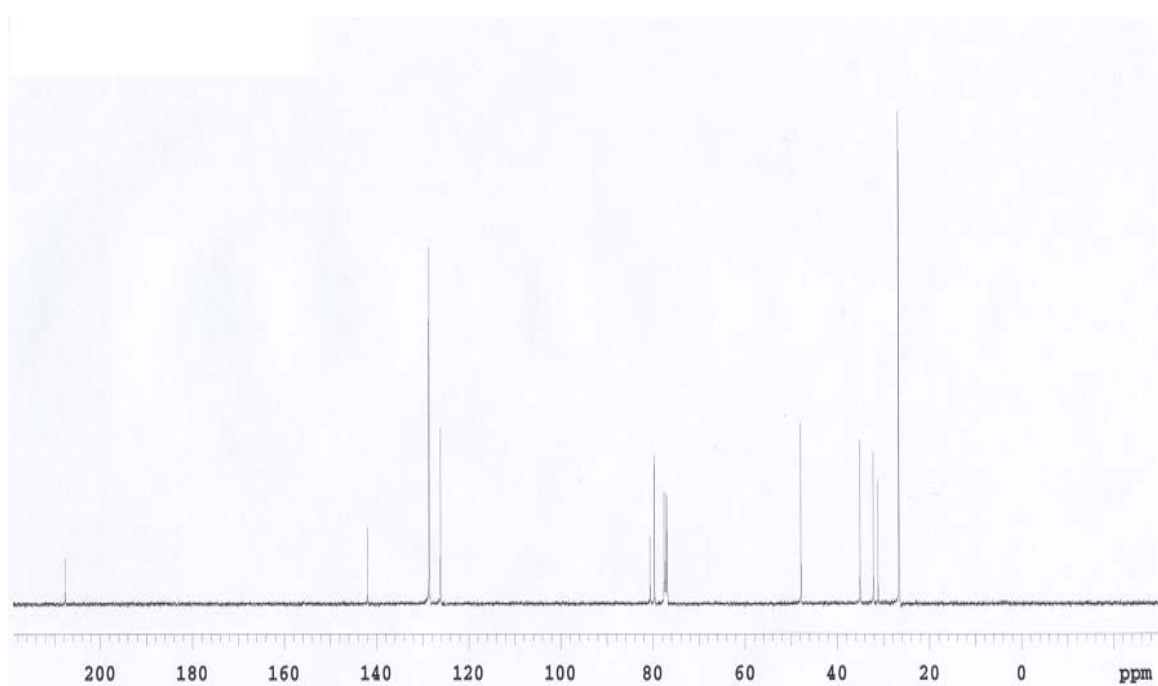

HPLC Daicel Chiralcel AS-H, Hexanes / IPA = 99:1, 0.8 mL/min,  $\lambda = 220$  nm, 20.0 °C.

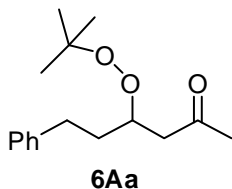

Mixture of Q-NH<sub>2</sub> and QD-NH<sub>2</sub> catalyzed reaction

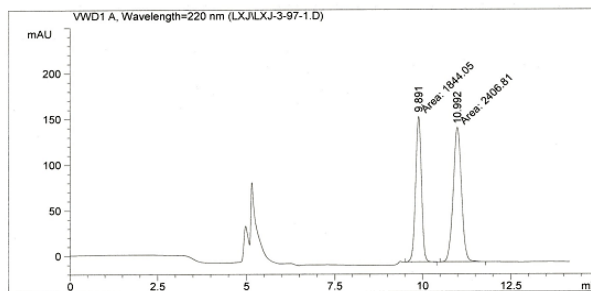

=====  
Area Percent Report  
=====

Sorted By : Signal  
Multiplier : 1.0000  
Dilution : 1.0000  
Sample Amount : 1.00000 [ng/ul] (not used in calc.)  
Use Multiplier & Dilution Factor with ISTDs

Signal 1: VWD1 A, Wavelength=220 nm

| Peak #   | RetTime [min] | Type | Width [min] | Area [mAU*s] | Height [mAU] | Area %  |
|----------|---------------|------|-------------|--------------|--------------|---------|
| 1        | 9.891         | MM   | 0.1913      | 1844.05481   | 160.64363    | 43.3807 |
| 2        | 10.992        | MM   | 0.2715      | 2406.81274   | 147.72566    | 56.6193 |
| Totals : |               |      |             | 4250.86755   | 308.36929    |         |

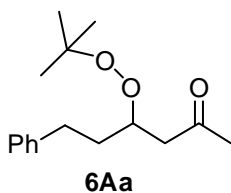

91% ee obtained from Q-NH<sub>2</sub> catalyzed reaction

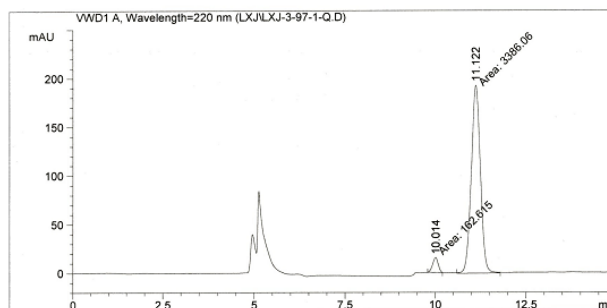

=====  
Area Percent Report  
=====

Sorted By : Signal  
Multiplier : 1.0000  
Dilution : 1.0000  
Sample Amount : 1.00000 [ng/ul] (not used in calc.)  
Use Multiplier & Dilution Factor with ISTDs

Signal 1: VWD1 A, Wavelength=220 nm

| Peak #   | RetTime [min] | Type | Width [min] | Area [mAU*s] | Height [mAU] | Area %  |
|----------|---------------|------|-------------|--------------|--------------|---------|
| 1        | 10.014        | MM   | 0.1749      | 162.61504    | 15.49242     | 4.5824  |
| 2        | 11.122        | MM   | 0.2915      | 3386.05518   | 193.62650    | 95.4176 |
| Totals : |               |      |             | 3548.67021   | 209.11892    |         |

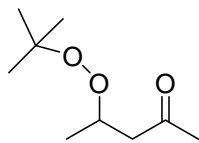

6Ba

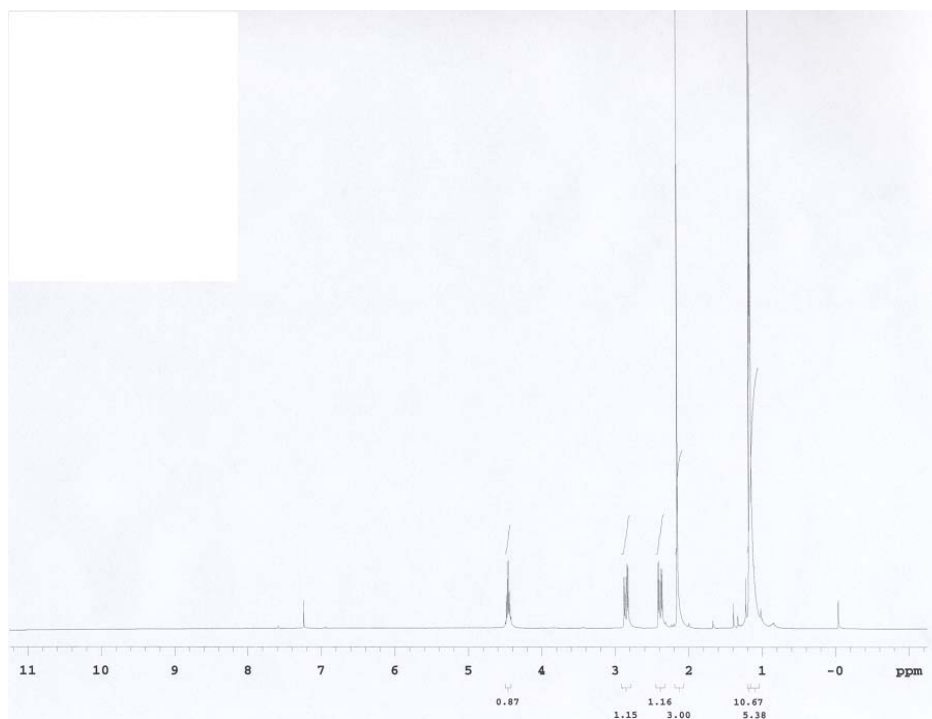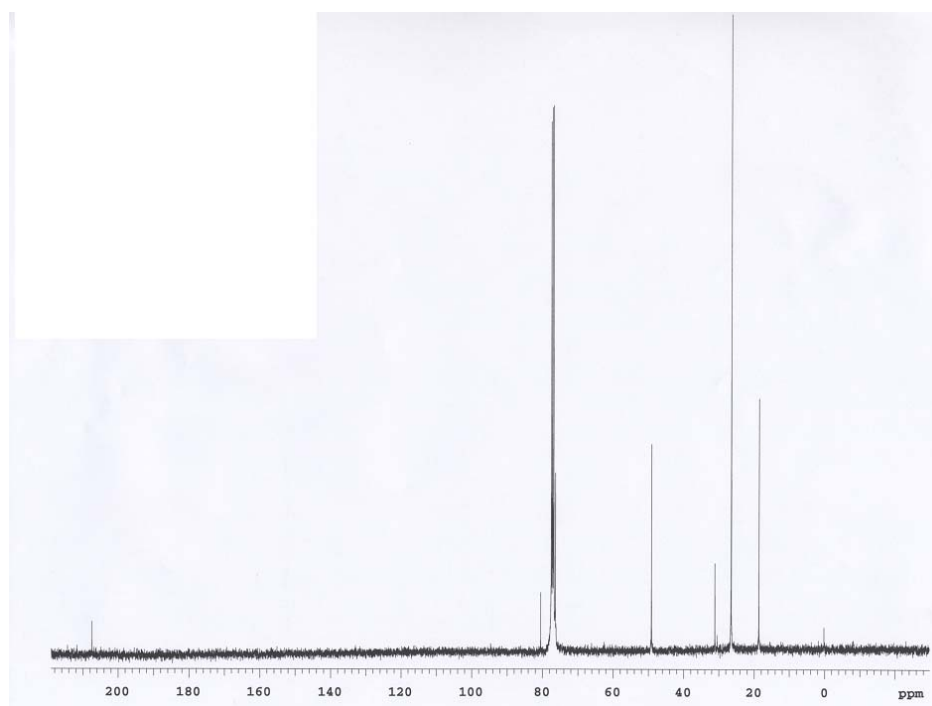

GC HP Chiral (20% Permethylated  $\beta$ -Cyclodextrin, 30m x 0.25 mm) Inject Temp: 240 °C, FID  
 Temp: 260 °C, Inlet pressure :10 psi. Oven Temp, 50 °C 5 min, 2 °C/min, 80°C

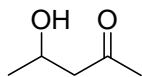

Mixture obtained from  
 Q-NH<sub>2</sub> and QD-NH<sub>2</sub>  
 catalyzed product **6Ba**

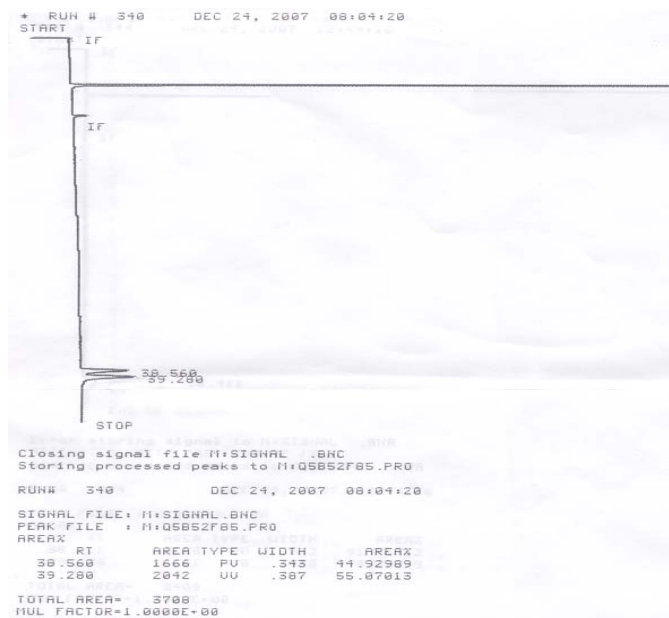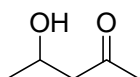

84% ee, obtained from  
 Q-NH<sub>2</sub> catalyzed  
 product **6Ba**

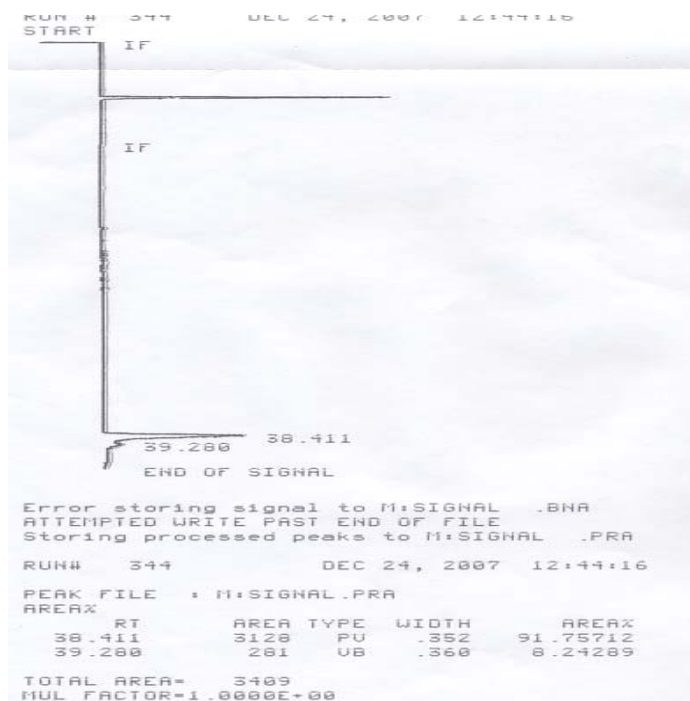

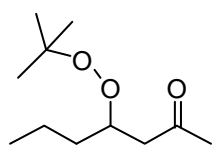

6Ca

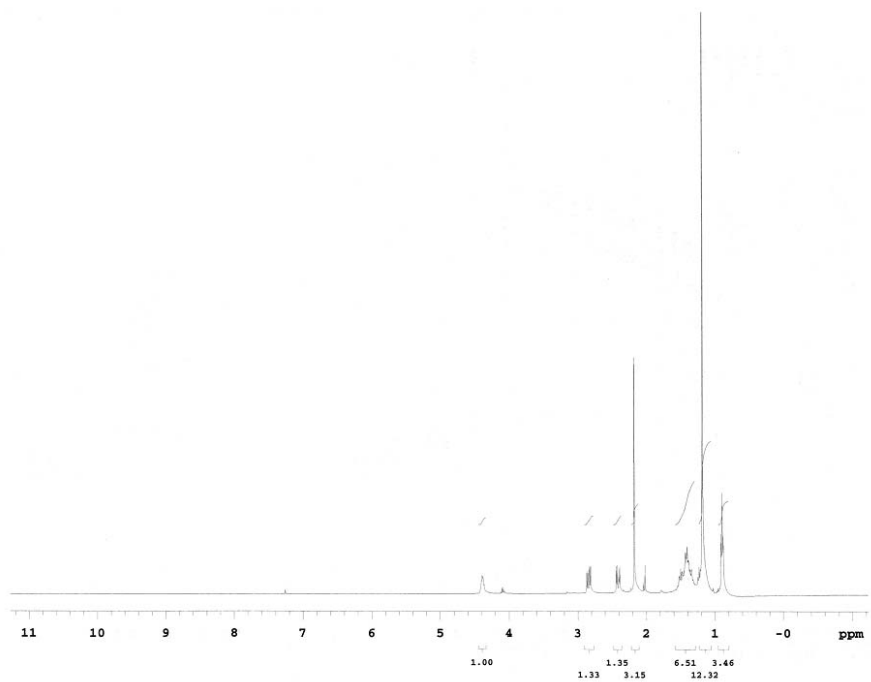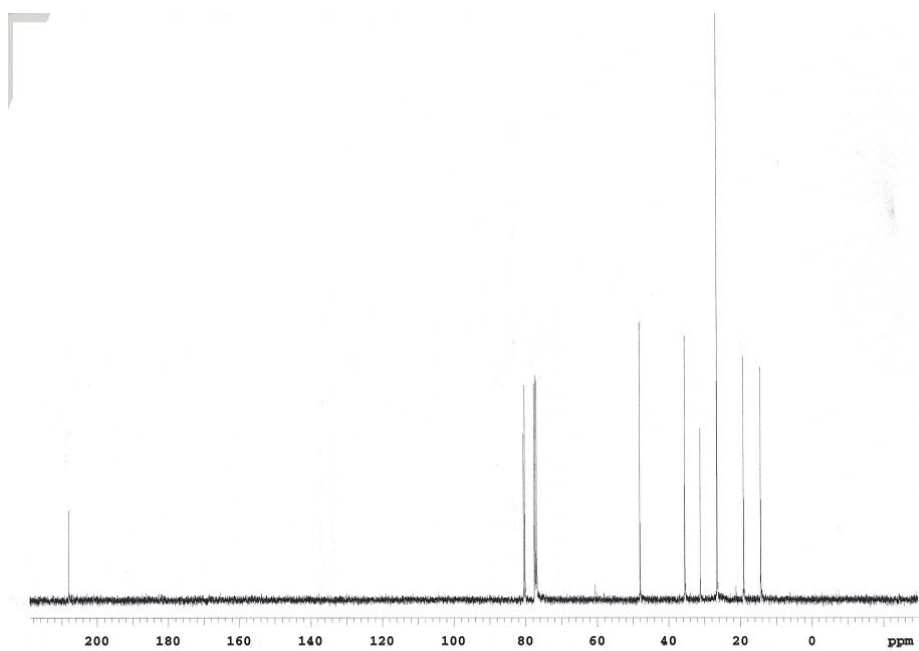



GC HP Chiral (20% Permethylated  $\beta$ -Cyclodextrin, 30m x 0.25 mm), Inject Temp: 240 °C, Fid  
 Temp: 260 °C, Inlet pressure 10 psi. Oven Temp, 50 °C 5min, 2.5 °C/min, 100 °C

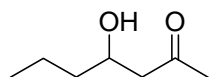

Mixture obtained from  
 Q-NH<sub>2</sub> and QD-NH<sub>2</sub>  
 catalyzed product **6Ca**

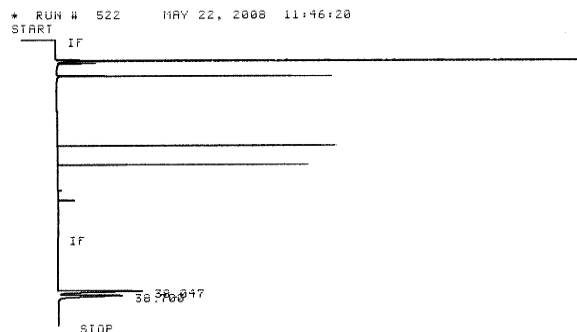

Closing signal file M:SIGNAL .BNC  
 Storing processed peaks to M:067F190D.PRO  
 RUN# 522 MAY 22, 2008 11:46:20  
 SIGNAL FILE: M:SIGNAL.BNC  
 PEAK FILE : M:067F190D.PRO  
 AREA#

| RT     | AREA | TYPE | WIDTH | PU | AREA#    |
|--------|------|------|-------|----|----------|
| 38.047 | 9015 | PU   | .234  |    | 52.52274 |
| 38.700 | 8143 | UB   | .275  |    | 47.47728 |

TOTAL AREA= 17164  
 MUL FACTOR=1.0000E+00

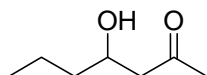

90% ee, obtained from Q-  
 NH<sub>2</sub> catalyzed product **6Ca**

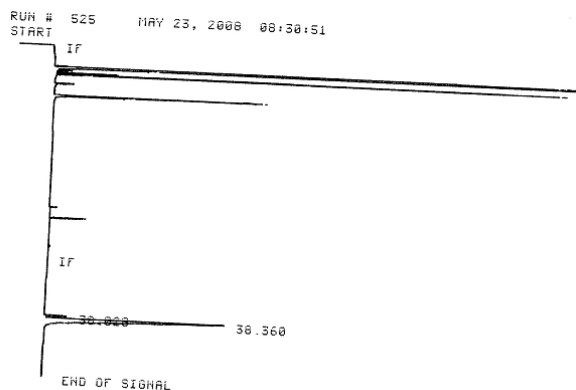

Closing signal file M:SIGNAL .BNA  
 Storing processed peaks to M:SIGNAL .PRA  
 RUN# 525 MAY 23, 2008 08:30:51  
 SIGNAL FILE: M:SIGNAL.BNA  
 PEAK FILE : M:SIGNAL.PRA  
 AREA#

| RT     | AREA  | TYPE | WIDTH | PU | AREA#    |
|--------|-------|------|-------|----|----------|
| 38.028 | 1696  | PU   | .162  |    | 5.20916  |
| 38.360 | 30062 | UB   | .381  |    | 94.79085 |

TOTAL AREA= 32558  
 MUL FACTOR=1.0000E+00

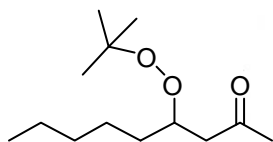

6Da

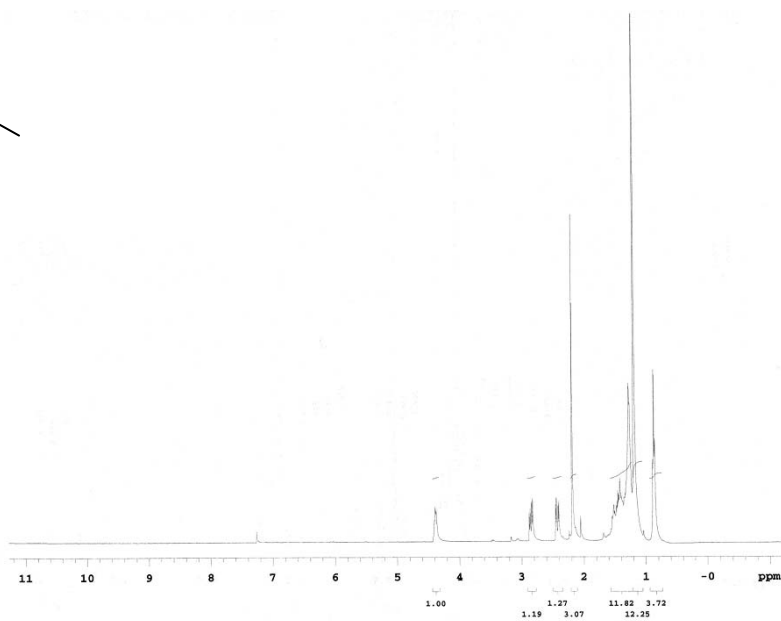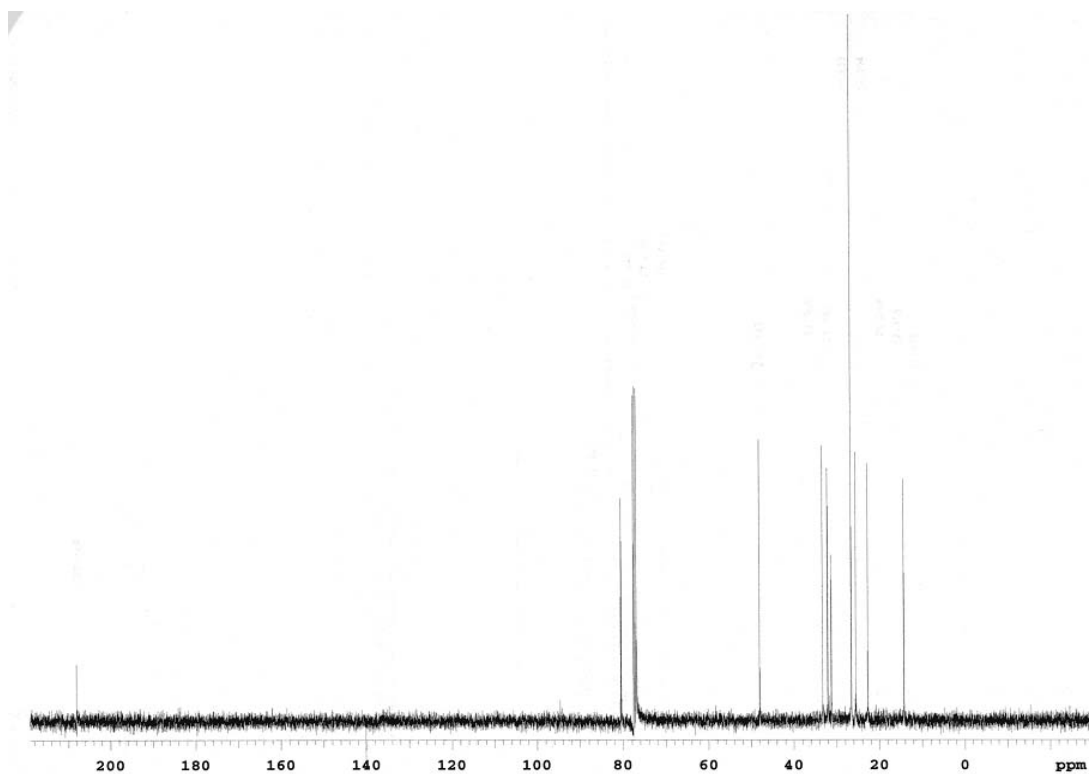

GC HP Chiral(20% Permethylated  $\beta$ -Cyclodextrin, 30m x 0.25 mm), Inject Temp: 240°C, Fid

Temp: 260°C, Inlet pressure 10 psi. Oven Temp, 50°C 5min, 5°C/min, 100°C

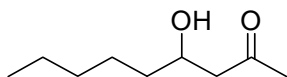

Mixture obtained from  
Q-NH<sub>2</sub> and QD-NH<sub>2</sub>  
catalyzed product **6Da**

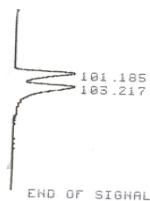

Closing signal file M:SIGNAL .BNA  
Storing processed peaks to M:SIGNAL .PRA  
RUN# 312 DEC 5, 2007 07:17:31  
SIGNAL FILE: M:SIGNAL.BNA  
PEAK FILE : M:SIGNAL.PRA  
AREA#

| RT      | AREA | TYPE | WIDTH | AREA%    |
|---------|------|------|-------|----------|
| 101.185 | 6151 | PU   | 1.005 | 42.09266 |
| 103.217 | 8462 | UU   | 1.410 | 57.90734 |

TOTAL AREA= 14613  
MUL FACTOR=1.0000E+00

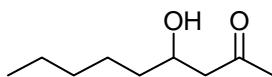

93% ee, obtained from Q-NH<sub>2</sub>  
catalyzed product **(+)**6Da****

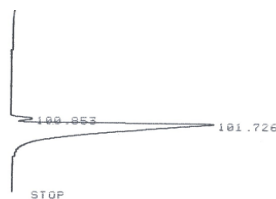

Closing signal file M:SIGNAL .BNC  
Storing processed peaks to M:Q59C60C2.PRO  
RUN# 314 DEC 5, 2007 12:27:44  
SIGNAL FILE: M:SIGNAL.BNC  
PEAK FILE : M:Q59C60C2.PRO  
AREA#

| RT      | AREA  | TYPE | WIDTH | AREA%    |
|---------|-------|------|-------|----------|
| 100.853 | 1478  | UU   | .601  | 3.71955  |
| 101.726 | 38258 | UU   | 1.709 | 96.28045 |

TOTAL AREA= 39736  
MUL FACTOR=1.0000E+00

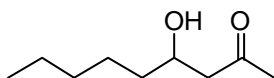

90% ee, obtained from QD-  
NH<sub>2</sub> catalyzed product **(-)**6Da****

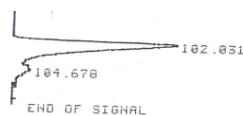

Closing signal file M:SIGNAL .BNA  
Storing processed peaks to M:SIGNAL .PRA  
RUN# 198 MAY 27, 1901 06:26:18  
SIGNAL FILE: M:SIGNAL.BNA  
PEAK FILE : M:SIGNAL.PRA  
AREA#

| RT      | AREA | TYPE | WIDTH | AREA%    |
|---------|------|------|-------|----------|
| 34.021  | 34   | FB   | .567  | .33031   |
| 43.415  | 87   | FP   | .242  | .86567   |
| 46.435  | 115  | PU   | .958  | 1.14428  |
| 59.021  | 28   | PU   | .233  | .27861   |
| 77.448  | 54   | PU   | .900  | .53731   |
| 83.749  | 36   | FP   | .600  | .35821   |
| 85.315  | 215  | PU   | .896  | 2.13930  |
| 88.139  | 127  | FB   | 1.058 | 1.26368  |
| 90.495  | 41   | PU   | .603  | .48796   |
| 102.031 | 8858 | PU   | 1.055 | 88.13933 |
| 104.678 | 455  | UB   | .843  | 4.52736  |

TOTAL AREA= 10050  
MUL FACTOR=1.0000E+00

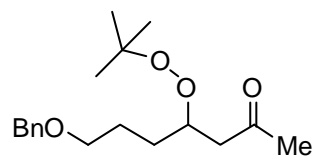

6Ea

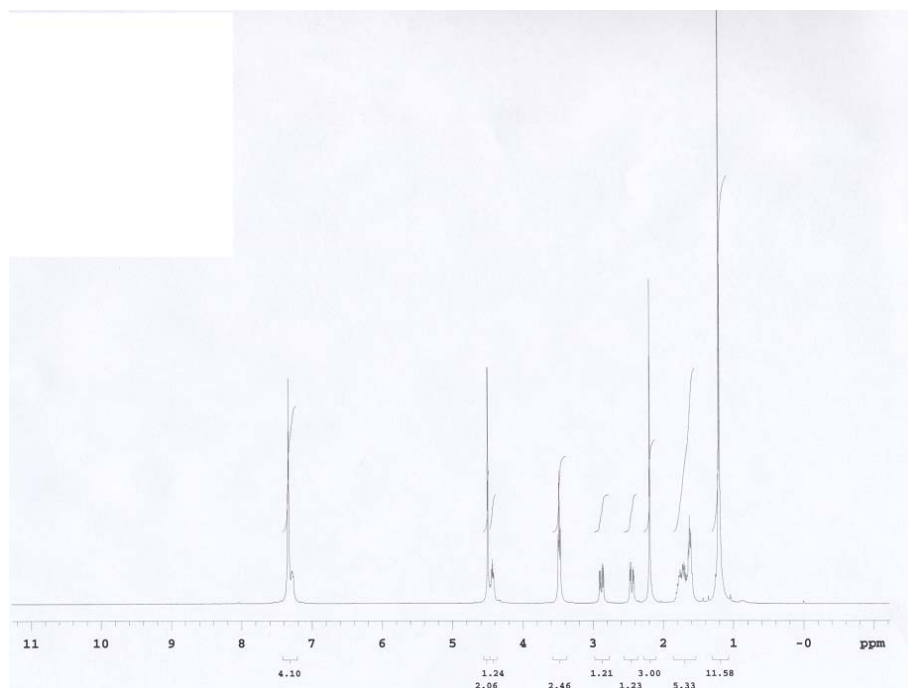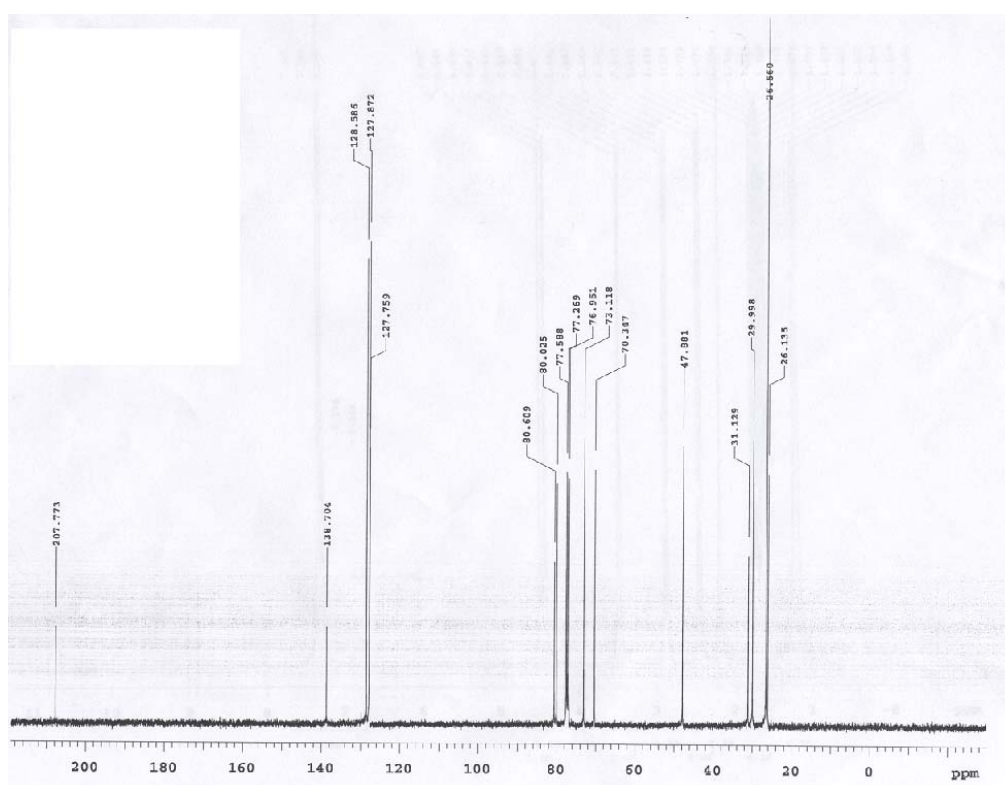

HPLC [Daicel Chiralcel AD, Hexanes / IPA = 99.5:0.5, 0.6 mL/min,  $\lambda = 220$  nm, 20.0 °C,  $t_r$ (major) = 14.71 min,  $t_r$ (minor) = 16.15 min]

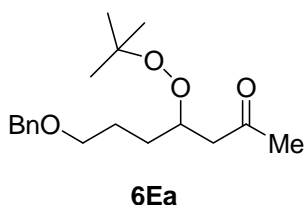

mixture of Q-NH<sub>2</sub> and QD-NH<sub>2</sub> catalyzed reaction

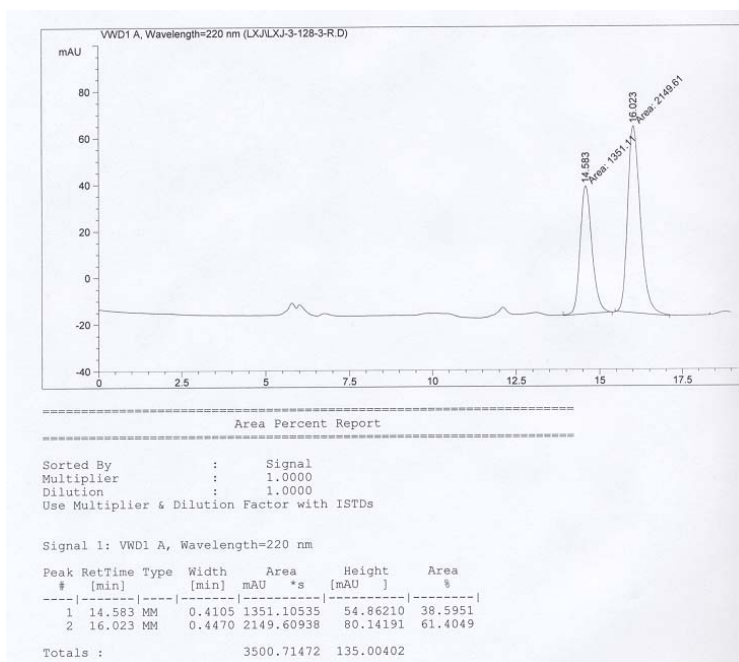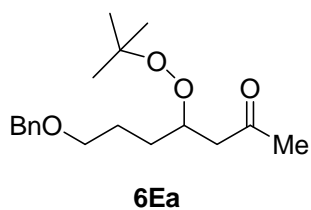

91% ee, obtained from Q-NH<sub>2</sub> catalyzed reaction

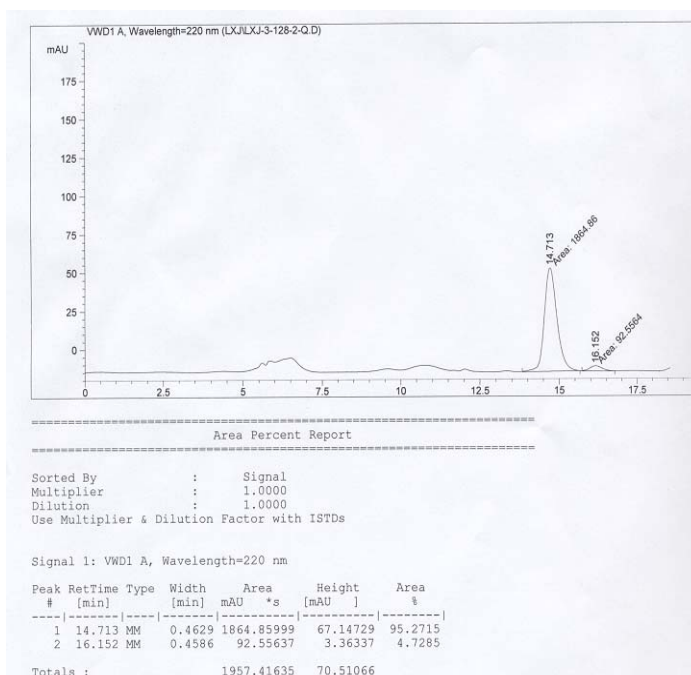

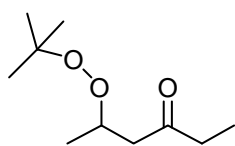

6Fa

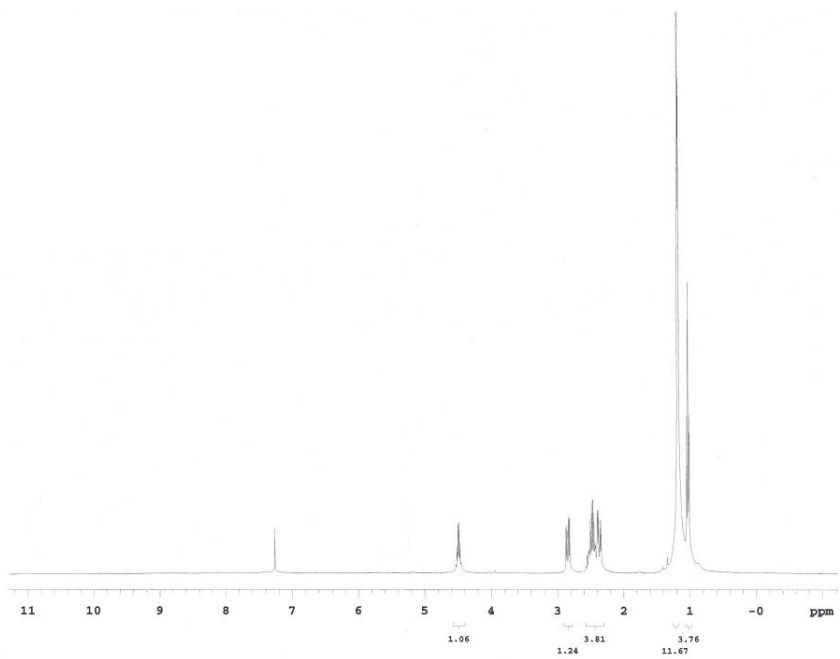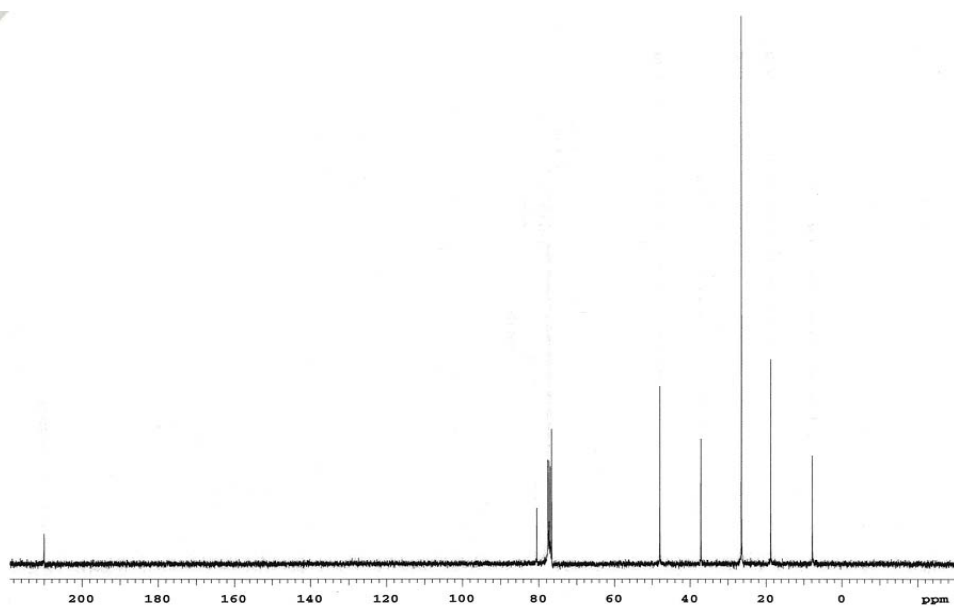

GC HP Chiral (20% Permethylated  $\beta$ -Cyclodextrin, 30m x 0.25 mm) Inject Temp: 250 °C, Fid  
 Temp: 220 °C, Inlet pressure 13 psi. Oven Temp: 85 °C.

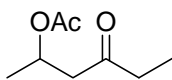

Mixture obtained from  
 Q-NH<sub>2</sub> and QD-NH<sub>2</sub>  
 catalyzed product **6Fa**

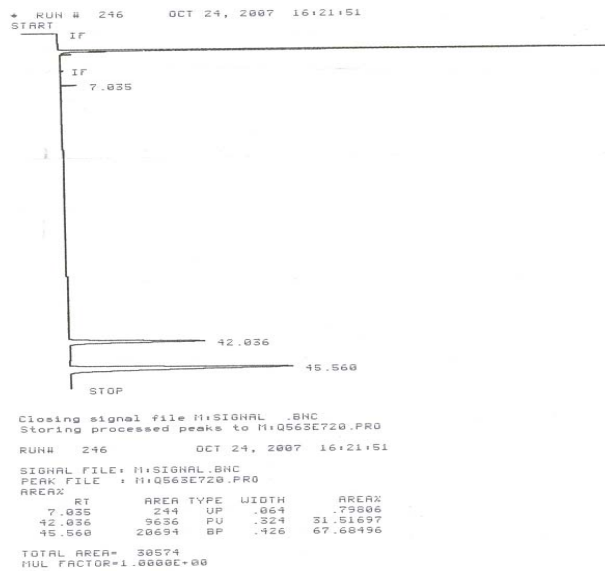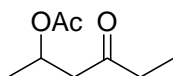

89% ee, obtained from Q-NH<sub>2</sub>  
 catalyzed product **6Fa**

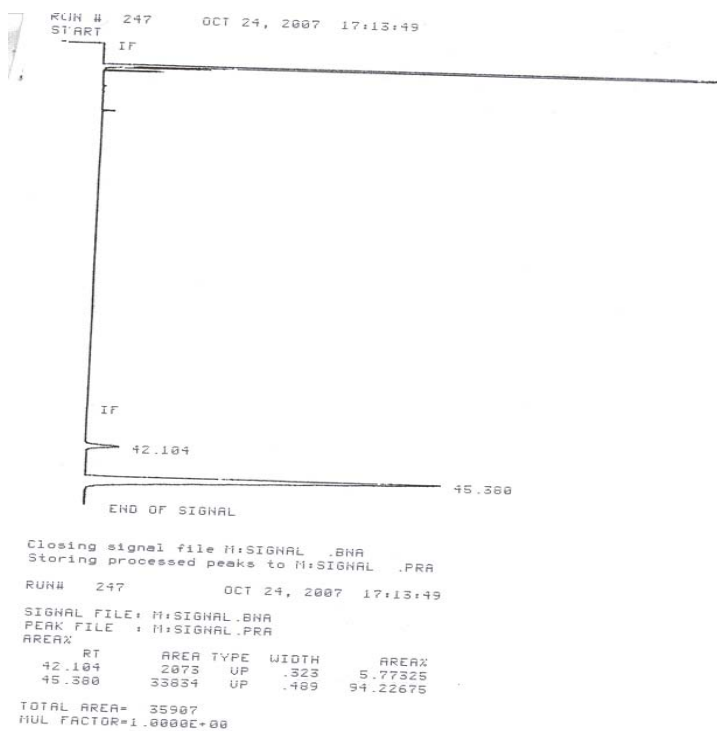

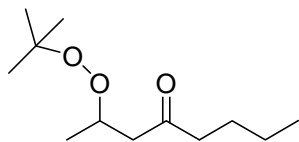

6Ha

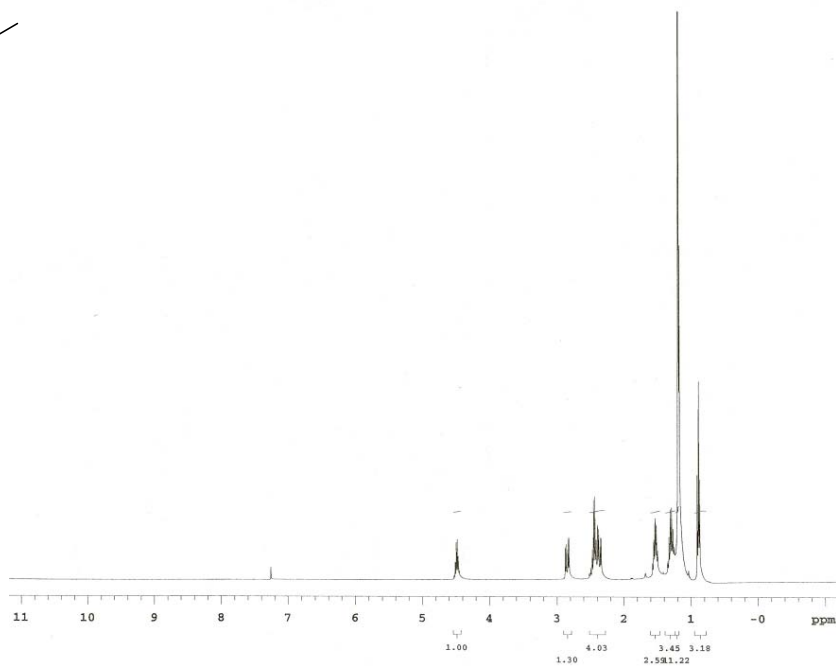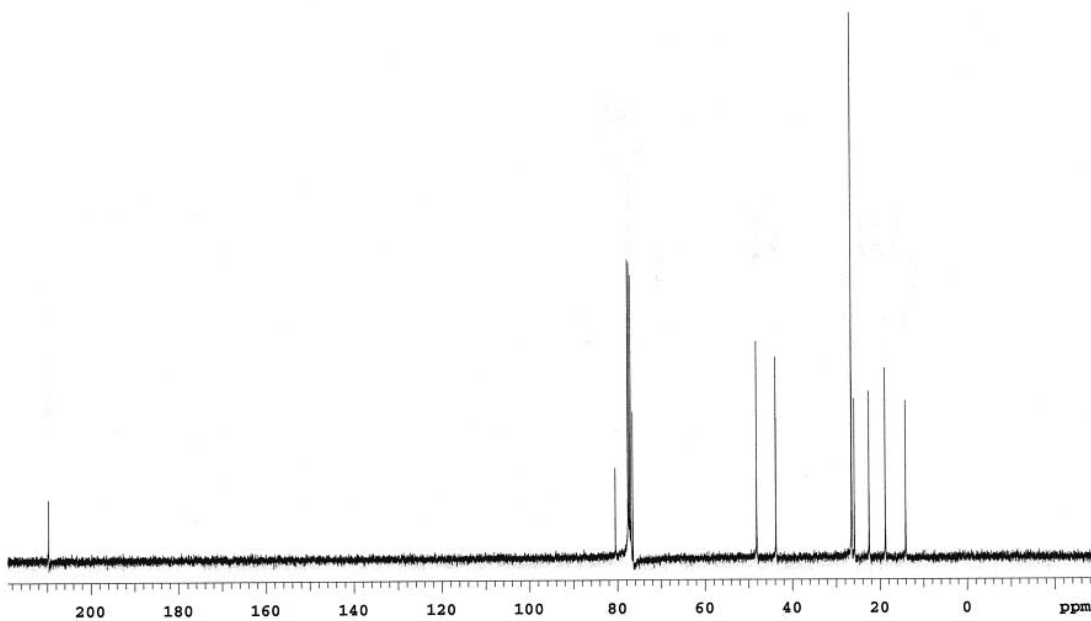



GC HP Chiral (20% Permethyated  $\beta$ -Cyclodextrin, 30m x 0.25 mm), Inject Temp: 250 °C, Fid  
 Temp: 220 °C, Inlet pressure 13 psi. Oven Temp: 110 °C

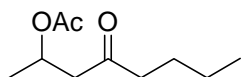

Mixture obtained from  
 Q-NH<sub>2</sub> and QD-NH<sub>2</sub>  
 catalyzed product **6Ha**

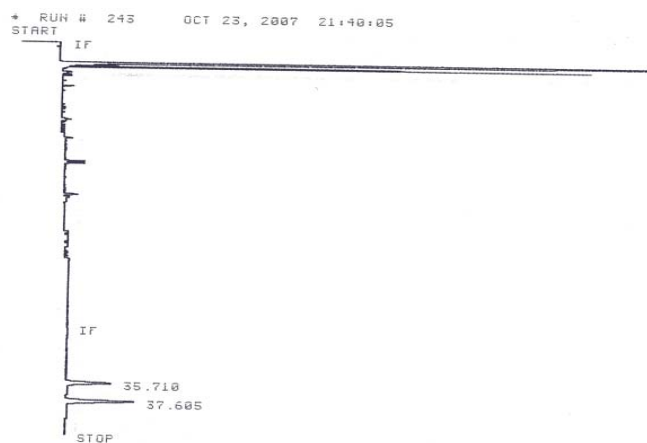

Closing signal file M:SIGNAL .BNC  
 Storing processed peaks to M:Q562E036.PRO  
 RUN# 243 OCT 23, 2007 21:40:05  
 SIGNAL FILE: M:SIGNAL.BNC  
 PEAK FILE : M:Q562E036.PRO  
 AREAX

| RT     | AREA | TYPE | WIDTH | AREAX    |
|--------|------|------|-------|----------|
| 35.710 | 716  | PU   | .298  | 41.31565 |
| 37.605 | 1017 | PP   | .292  | 58.68435 |

TOTAL AREA= 1733  
 MUL FACTOR=1.0000E+00

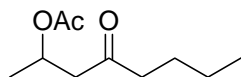

87% ee, obtained from  
 Q-NH<sub>2</sub> catalyzed product **6Ha**

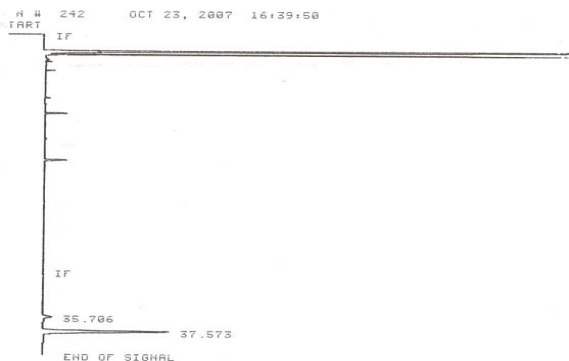

Closing signal file M:SIGNAL .BNA .PRA  
 Storing processed peaks to M:SIGNAL .PRA  
 RUN# 242 OCT 23, 2007 16:39:50  
 SIGNAL FILE: M:SIGNAL.BNA  
 PEAK FILE : M:SIGNAL.PRA  
 AREAX

| RT     | AREA | TYPE | WIDTH | AREAX    |
|--------|------|------|-------|----------|
| 35.706 | 570  | PB   | .280  | 6.61560  |
| 37.573 | 8046 | PU   | .284  | 93.38430 |

TOTAL AREA= 8616  
 MUL FACTOR=1.0000E+00  
 TOTAL AREA= 1.00  
 MUL FACTOR=1.0000E+00

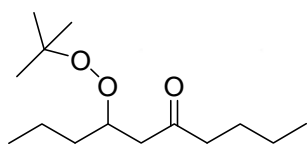

61a

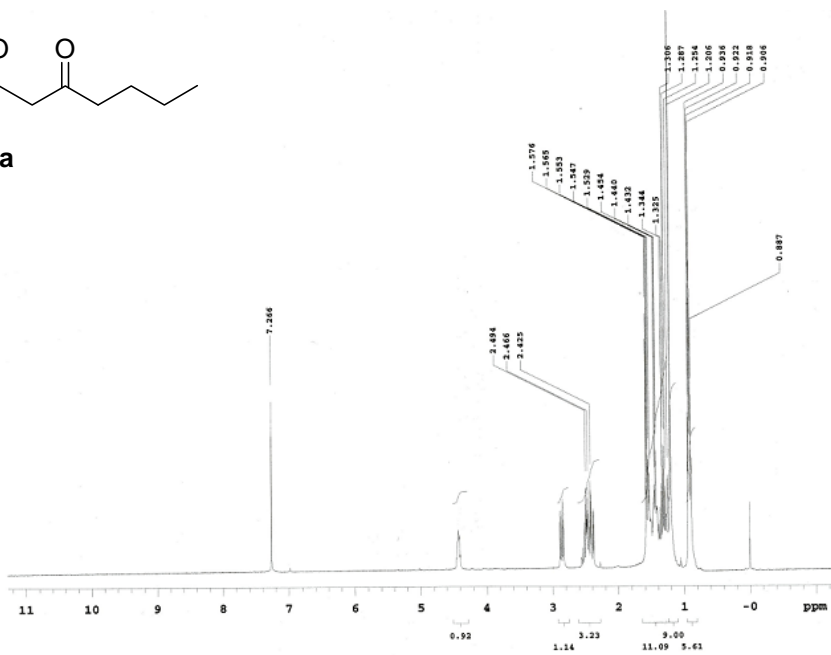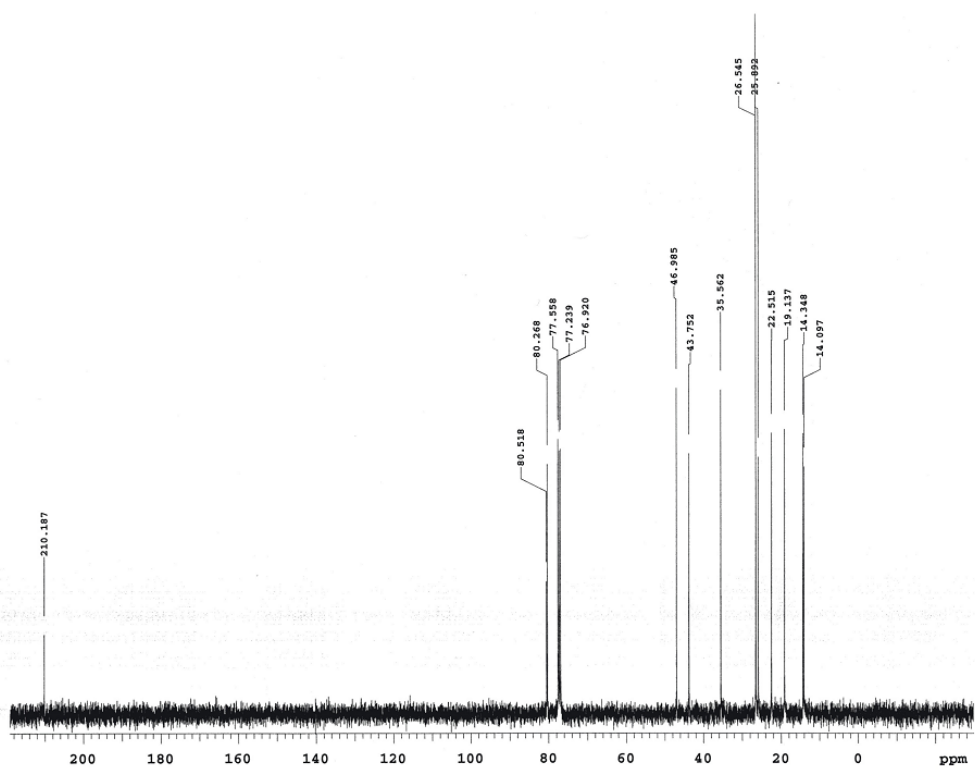

HPLC Daicel Chiralcel AD-H, Hexanes / IPA = 99.2:0.8, 0.78 mL/min,  $\lambda = 220$  nm, 20.0 °C

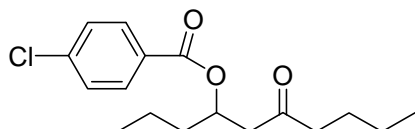

Mixture obtained from Q-NH<sub>2</sub> and QD-NH<sub>2</sub> catalyzed product **6la**

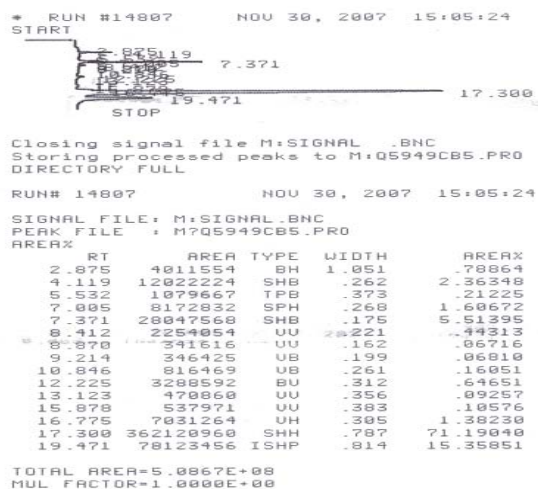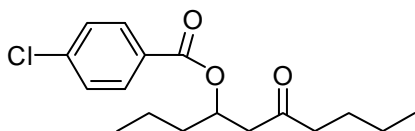

94% ee, obtained from Q-NH<sub>2</sub> catalyzed product **(+)-6la**

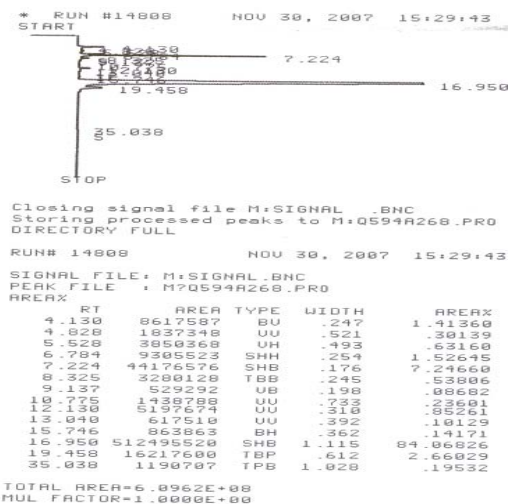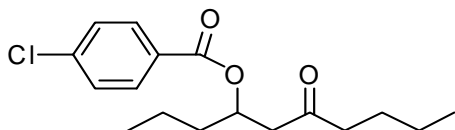

88% ee, obtained from QD-NH<sub>2</sub> catalyzed product **(-)-6la**

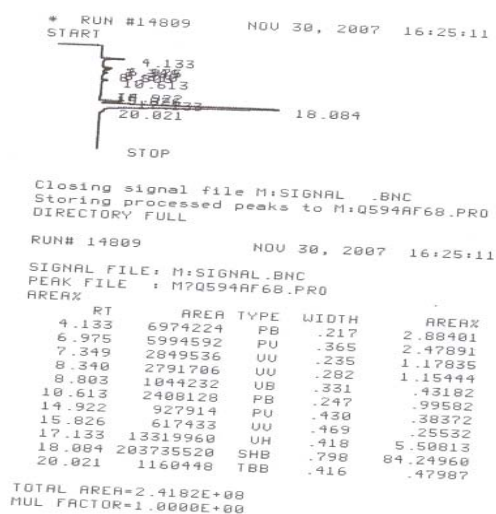

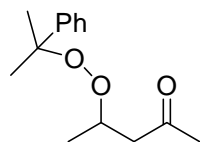

**6Bb**

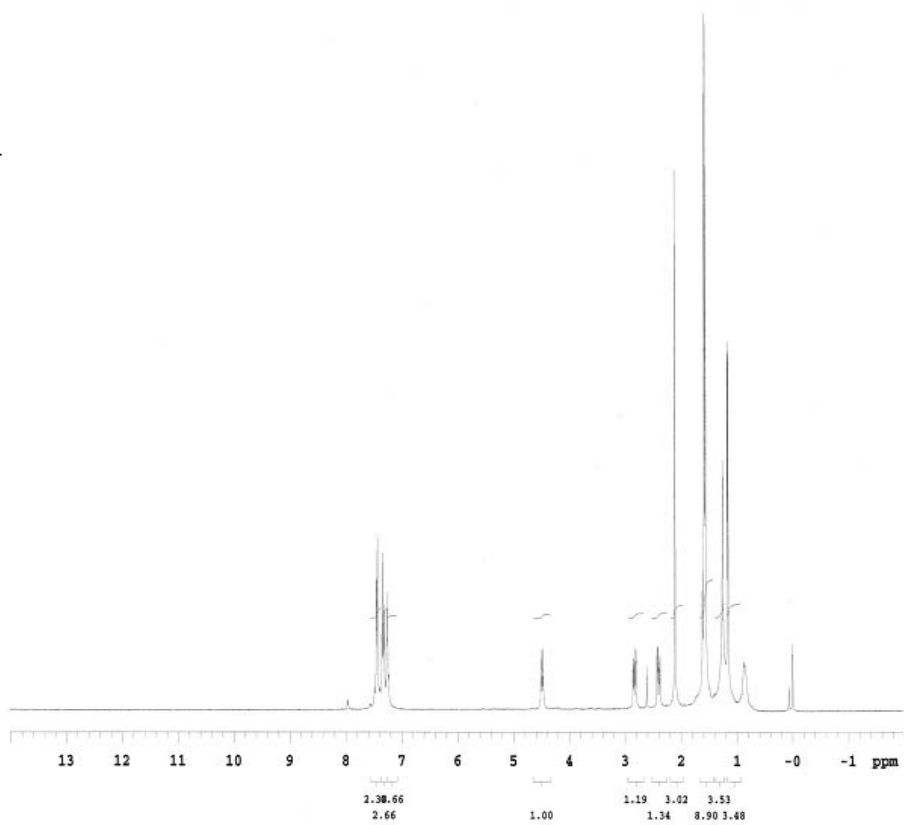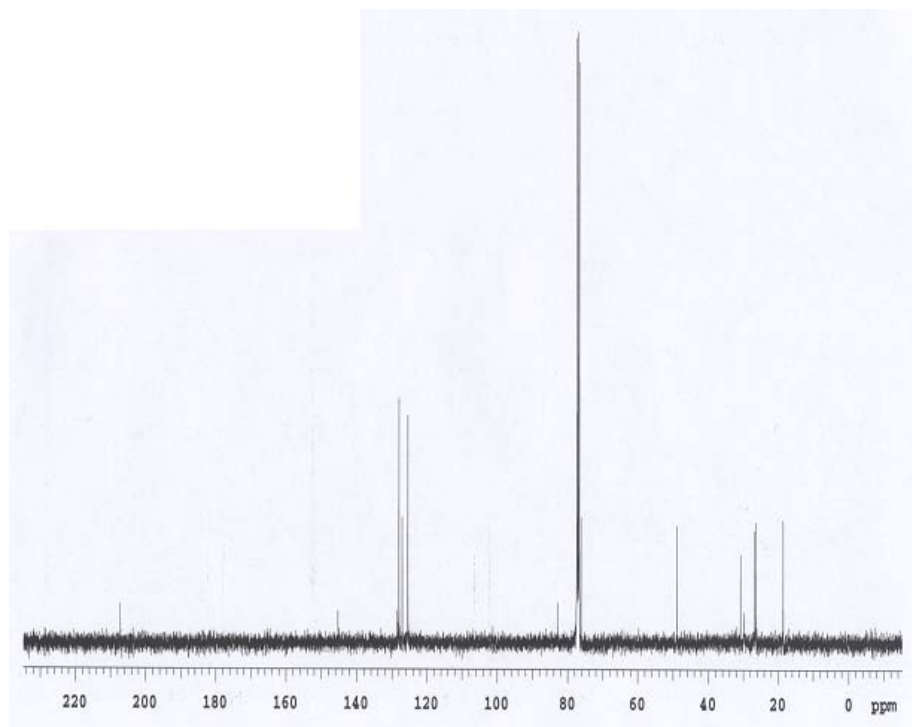

HPLC, Daicel Chiralcel AS-H, Hexanes / IPA = 99:1, 1.0 mL/min,  $\lambda = 220$  nm

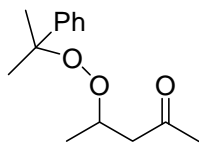

**6Bb**  
mixture of Q-NH<sub>2</sub> and  
QD-NH<sub>2</sub> catalyzed reaction

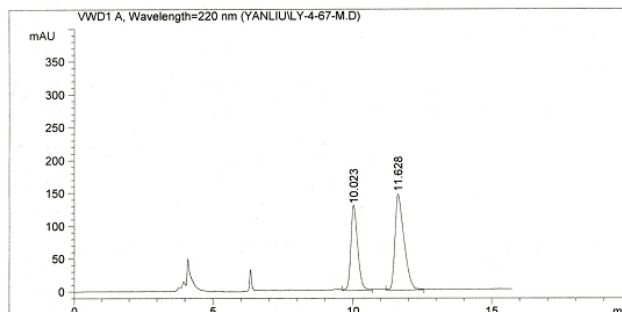

Area Percent Report

Sorted By : Signal  
Multiplier : 1.0000  
Dilution : 1.0000  
Sample Amount : 1.00000 [ng/ul] (not used in calc.)  
Use Multiplier & Dilution Factor with ISTDs

Signal 1: VWD1 A, Wavelength=220 nm

| Peak # | RetTime [min] | Type | Width [min] | Area mAU*s | Height [mAU] | Area %  |
|--------|---------------|------|-------------|------------|--------------|---------|
| 1      | 10.023        | VV   | 0.2615      | 2219.10132 | 127.34330    | 39.9990 |
| 2      | 11.628        | VV   | 0.3376      | 3328.79321 | 145.09052    | 60.0010 |

Totals : 5547.89453 272.43382

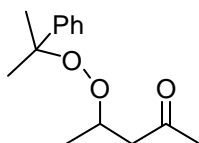

**6Bb**  
92% ee obtained from Q-NH<sub>2</sub>  
catalyzed reaction

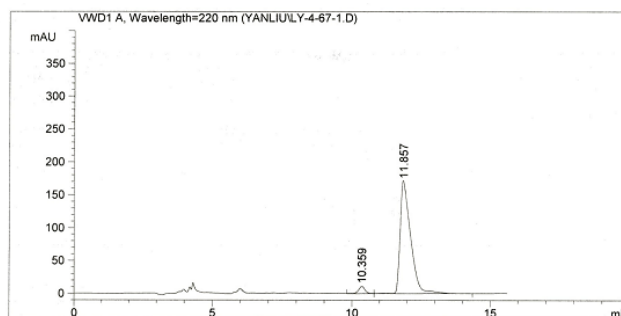

Area Percent Report

Sorted By : Signal  
Multiplier : 1.0000  
Dilution : 1.0000  
Sample Amount : 1.00000 [ng/ul] (not used in calc.)  
Use Multiplier & Dilution Factor with ISTDs

Signal 1: VWD1 A, Wavelength=220 nm

| Peak # | RetTime [min] | Type | Width [min] | Area mAU*s | Height [mAU] | Area %  |
|--------|---------------|------|-------------|------------|--------------|---------|
| 1      | 10.359        | VV   | 0.2530      | 184.27620  | 11.03659     | 3.9234  |
| 2      | 11.857        | VV   | 0.3799      | 4512.59424 | 169.84238    | 96.0766 |

Totals : 4696.87044 180.87896

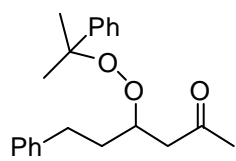

6Ab

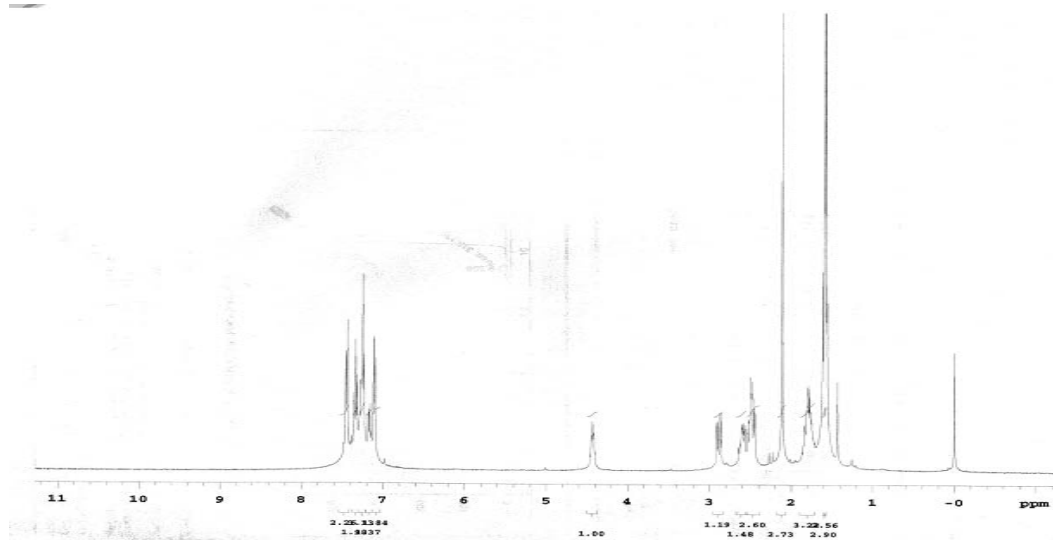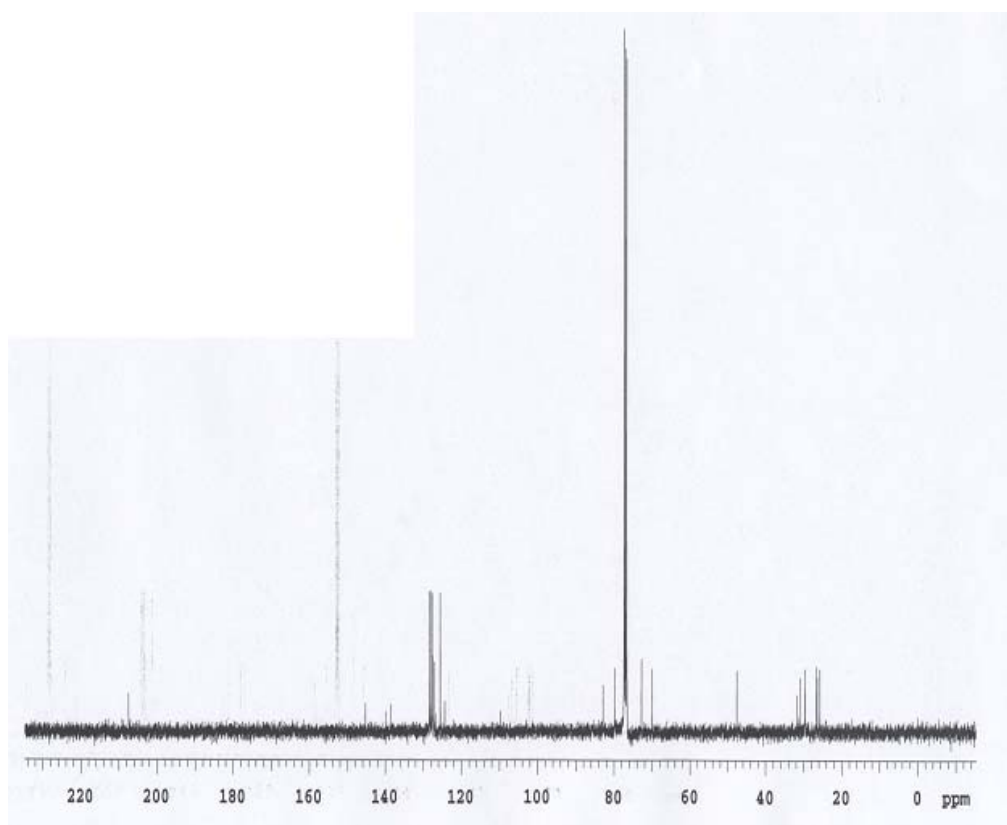

HPLC, Daicel Chiralcel AS-H, Hexanes / IPA = 99:1, 1.0 mL/min,  $\lambda = 220$  nm

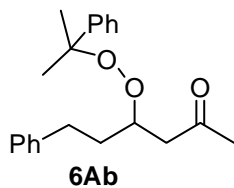

mixture of Q-NH<sub>2</sub> and QD-NH<sub>2</sub>  
catalyzed reaction

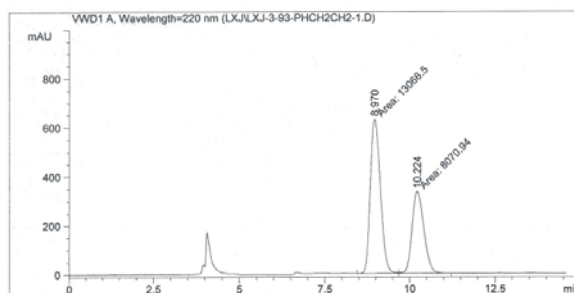

Area Percent Report

Sorted By : Signal  
Multiplier : 1.0000  
Dilution : 1.0000  
Sample Amount : 1.00000 [ng/ul] (not used in calc.)  
Use Multiplier & Dilution Factor with ISTDs

Signal 1: VWD1 A, Wavelength=220 nm

| Peak # | RetTime [min] | Type | Width [min] | Area mAU *s | Height [mAU] | Area %  |
|--------|---------------|------|-------------|-------------|--------------|---------|
| 1      | 8.970         | MF   | 0.3461      | 1.30665e4   | 629.20129    | 61.8169 |
| 2      | 10.224        | FM   | 0.4023      | 8070.93701  | 334.40027    | 38.1831 |

Totals : 2.11375e4 963.60156

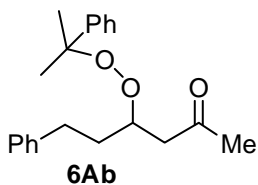

94% ee obtained from Q-NH<sub>2</sub>  
catalyzed reaction

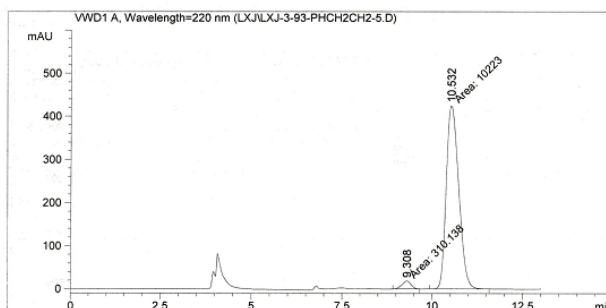

Area Percent Report

Sorted By : Signal  
Multiplier : 1.0000  
Dilution : 1.0000  
Sample Amount : 1.00000 [ng/ul] (not used in calc.)  
Use Multiplier & Dilution Factor with ISTDs

Signal 1: VWD1 A, Wavelength=220 nm

| Peak # | RetTime [min] | Type | Width [min] | Area mAU *s | Height [mAU] | Area %  |
|--------|---------------|------|-------------|-------------|--------------|---------|
| 1      | 9.308         | MM   | 0.2790      | 310.13763   | 18.52793     | 2.9444  |
| 2      | 10.532        | MM   | 0.4008      | 1.02230e4   | 425.09888    | 97.0556 |

Totals : 1.05332e4 443.62680

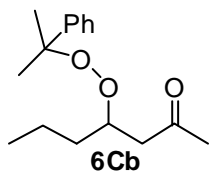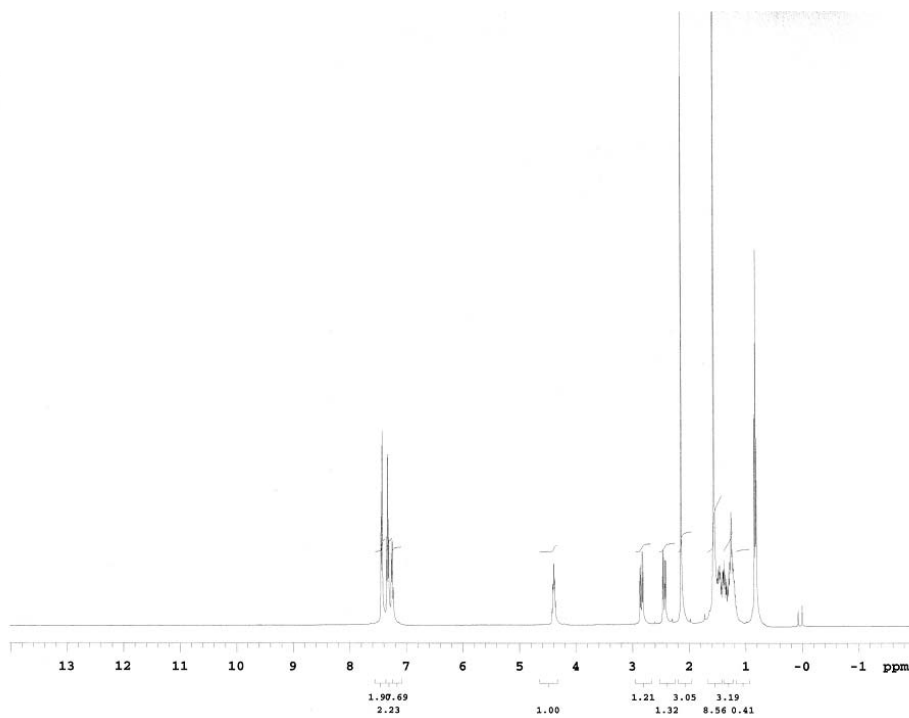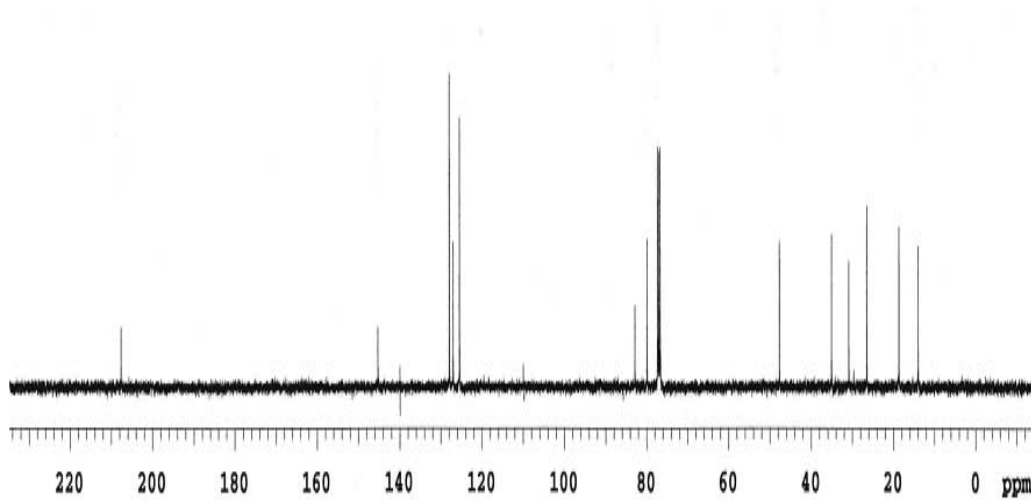



HPLC, Daicel Chiralcel AS-H, Hexanes / IPA = 99:1, 1.0 mL/min

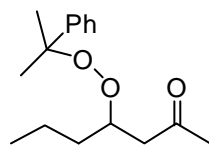

**6Cb**

mixture of Q-NH<sub>2</sub> and QD-NH<sub>2</sub>  
catalyzed reaction

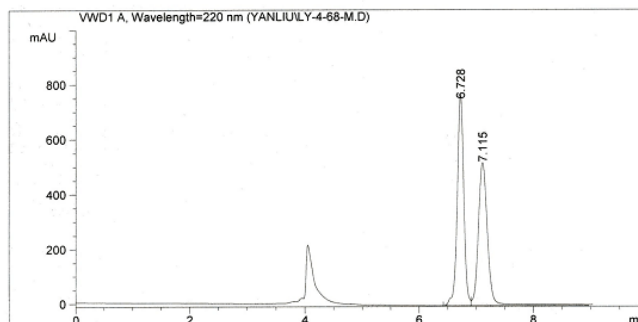

Area Percent Report

Sorted By : Signal  
Multiplier : 1.0000  
Dilution : 1.0000  
Sample Amount : 1.00000 [ng/ul] (not used in calc.)  
Use Multiplier & Dilution Factor with ISTDs

Signal 1: VWD1 A, Wavelength=220 nm

| Peak # | RetTime [min] | Type | Width [min] | Area mAU*s | Height [mAU] | Area %  |
|--------|---------------|------|-------------|------------|--------------|---------|
| 1      | 6.728         | BV   | 0.1309      | 6100.17969 | 741.81171    | 50.5766 |
| 2      | 7.115         | VV   | 0.1825      | 5961.08887 | 511.87125    | 49.4234 |

Totals : 1.20613e4 1253.68295

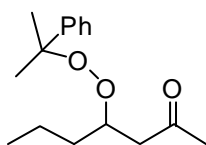

**6Cb**

92% ee obtained from Q-NH<sub>2</sub>  
catalyzed reaction

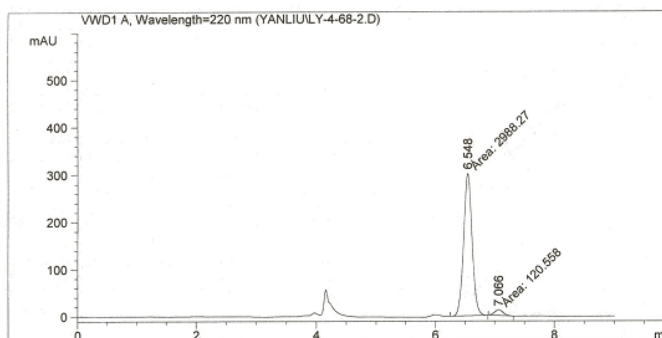

Area Percent Report

Sorted By : Signal  
Multiplier : 1.0000  
Dilution : 1.0000  
Sample Amount : 1.00000 [ng/ul] (not used in calc.)  
Use Multiplier & Dilution Factor with ISTDs

Signal 1: VWD1 A, Wavelength=220 nm

| Peak # | RetTime [min] | Type | Width [min] | Area mAU*s | Height [mAU] | Area %  |
|--------|---------------|------|-------------|------------|--------------|---------|
| 1      | 6.548         | MM   | 0.1648      | 2988.27319 | 302.24094    | 96.1221 |
| 2      | 7.066         | MM   | 0.1654      | 120.55843  | 12.14699     | 3.8779  |

Totals : 3108.83163 314.38793

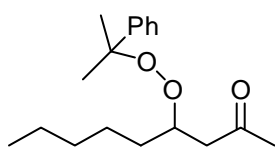

6Db

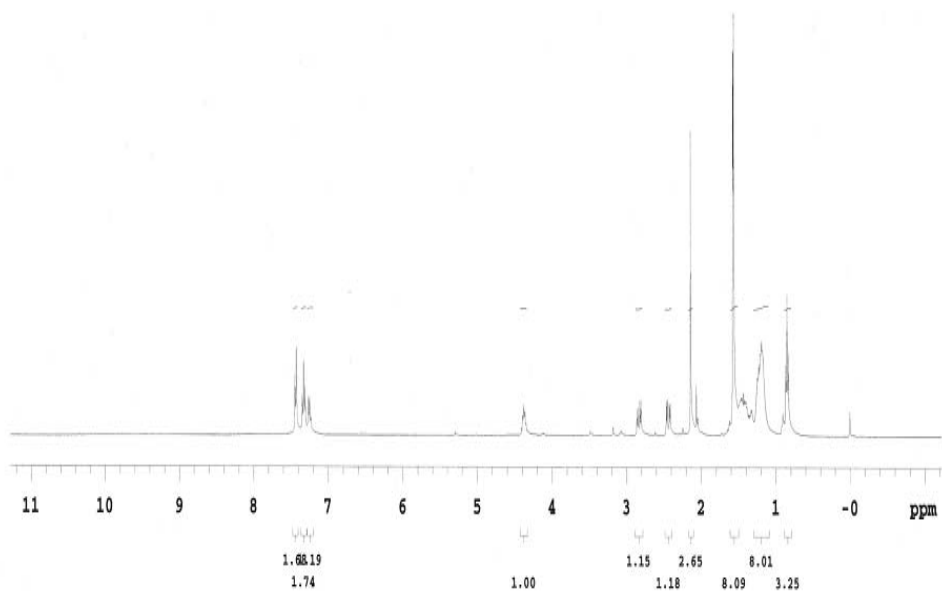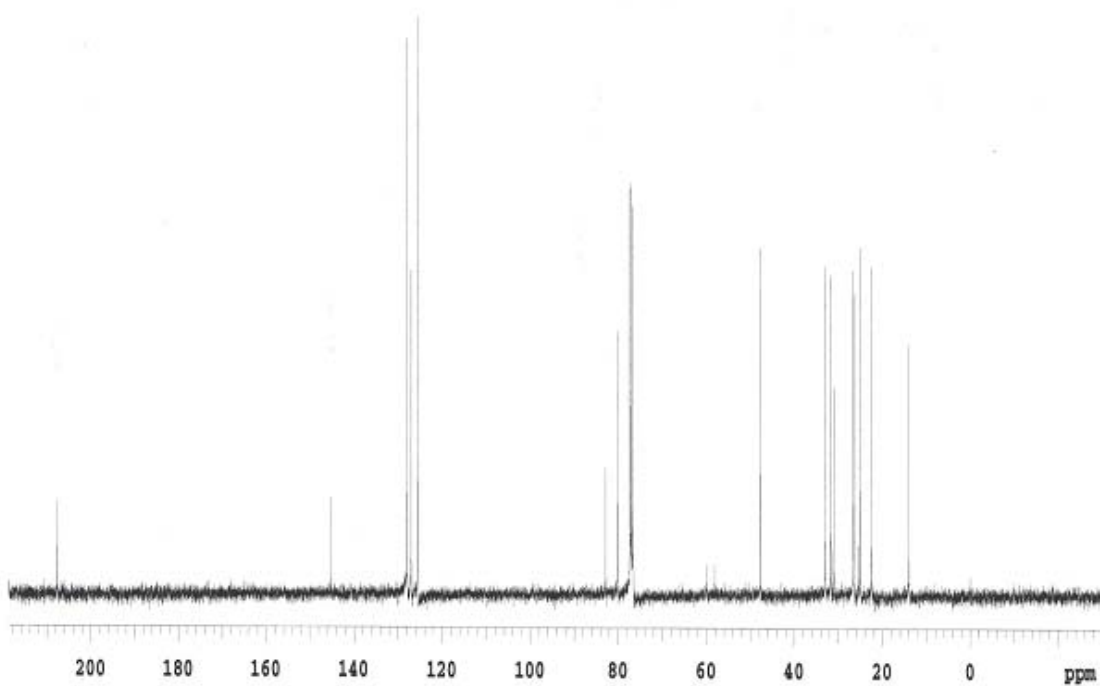

HPLC, Daicel Chiralcel AS-H, Hexanes / IPA = 99:1, 1.0 mL/min,  $\lambda = 220$  nm

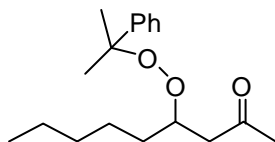

**6Db**

mixture of Q-NH<sub>2</sub> and QD-NH<sub>2</sub>  
catalyzed reaction

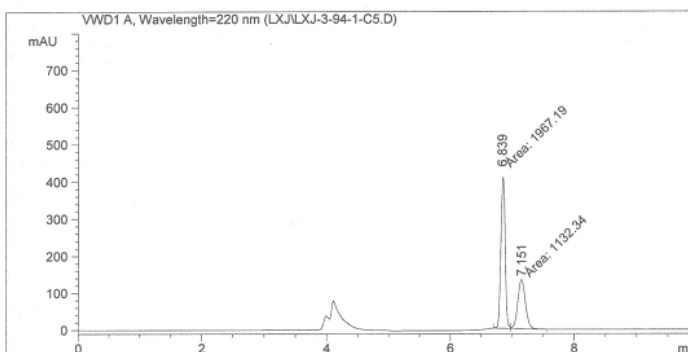

=====  
Area Percent Report  
=====

Sorted By : Signal  
Multiplier : 1.0000  
Dilution : 1.0000  
Sample Amount : 1.00000 [ng/ul] (not used in calc.)  
Use Multiplier & Dilution Factor with ISTDs

Signal 1: VWD1 A, Wavelength=220 nm

| Peak # | RetTime [min] | Type | Width [min] | Area mAU*s | Height [mAU] | Area %  |
|--------|---------------|------|-------------|------------|--------------|---------|
| 1      | 6.839         | MF   | 0.0769      | 1967.18579 | 426.54062    | 63.4673 |
| 2      | 7.151         | FM   | 0.1422      | 1132.33972 | 132.73480    | 36.5327 |

Totals : 3099.52551 559.27542

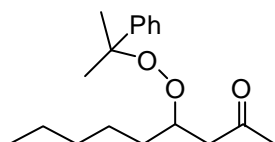

**6Db**

95% ee, obtained from  
Q-NH<sub>2</sub> catalyzed reaction

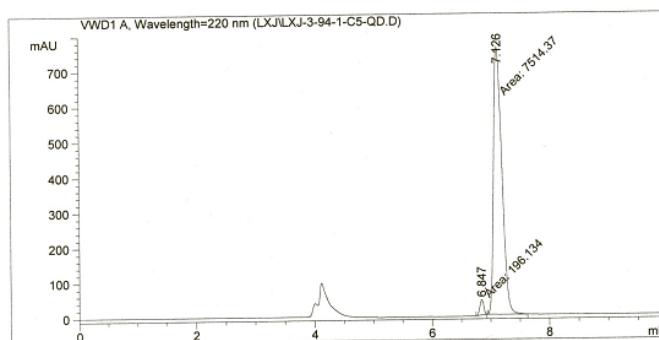

=====  
Area Percent Report  
=====

Sorted By : Signal  
Multiplier : 1.0000  
Dilution : 1.0000  
Sample Amount : 1.00000 [ng/ul] (not used in calc.)  
Use Multiplier & Dilution Factor with ISTDs

Signal 1: VWD1 A, Wavelength=220 nm

| Peak # | RetTime [min] | Type | Width [min] | Area mAU*s | Height [mAU] | Area %  |
|--------|---------------|------|-------------|------------|--------------|---------|
| 1      | 6.847         | MM   | 0.0793      | 196.13443  | 41.24803     | 2.5437  |
| 2      | 7.126         | MM   | 0.1653      | 7514.37158 | 757.73254    | 97.4563 |

Totals : 7710.50601 798.98058

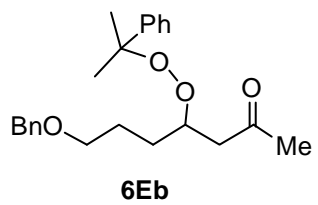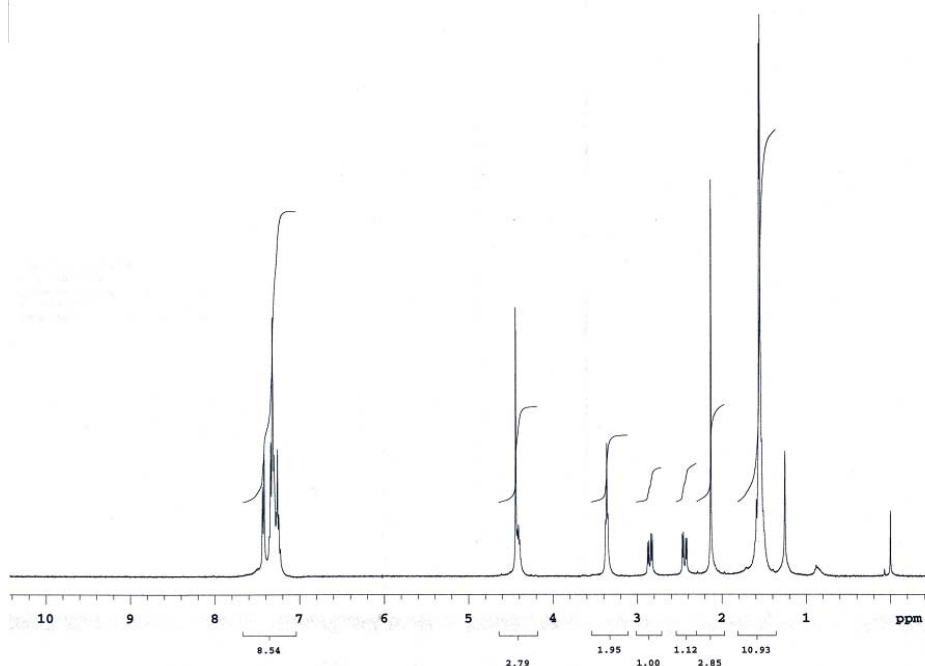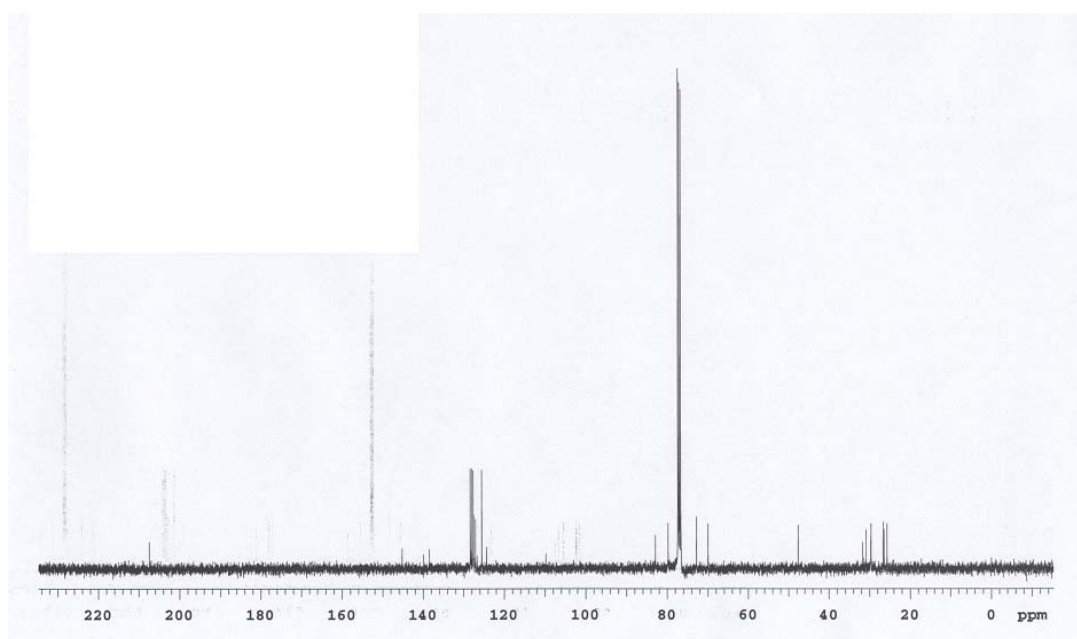

HPLC, Daicel Chiralcel AS-H, Hexanes / IPA = 99:1, 1 mL/min,  $\lambda = 220$  nm

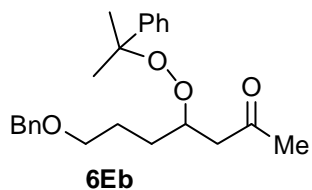

mixture of Q-NH<sub>2</sub> and QD-N catalyzed reaction

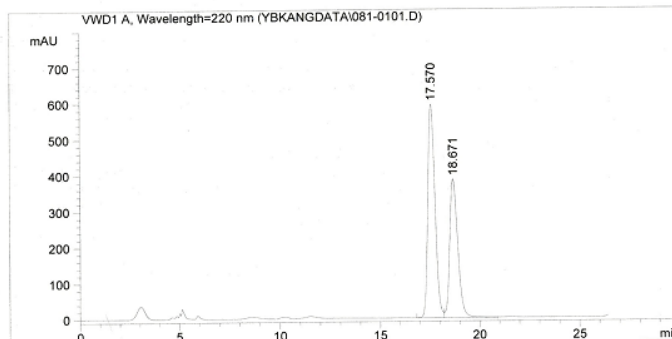

Area Percent Report

Sorted By : Signal  
Multiplier : 1.0000  
Dilution : 1.0000  
Use Multiplier & Dilution Factor with ISTDs

Signal 1: VWD1 A, Wavelength=220 nm

| Peak # | RetTime [min] | Type | Width [min] | Area mAU *s | Height [mAU] | Area %  |
|--------|---------------|------|-------------|-------------|--------------|---------|
| 1      | 17.570        | VV   | 0.3974      | 1.48768e4   | 593.28906    | 57.5092 |
| 2      | 18.671        | VV   | 0.4436      | 1.09917e4   | 385.17764    | 42.4908 |

Totals : 2.58685e4 978.46671

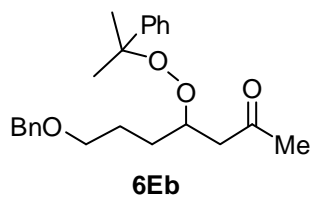

96% ee obtained from Q-NH<sub>2</sub> catalyzed reaction

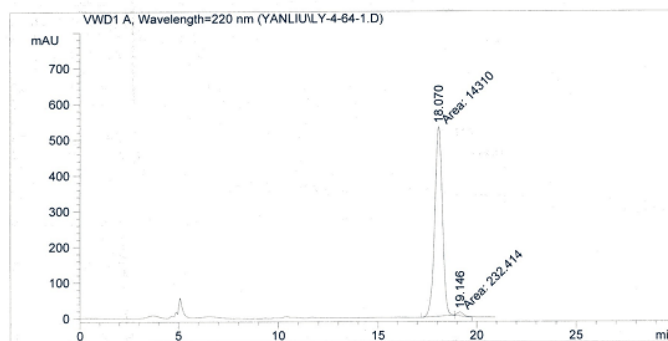

Area Percent Report

Sorted By : Signal  
Multiplier : 1.0000  
Dilution : 1.0000  
Sample Amount : 1.00000 [ng/ul] (not used in calc.)  
Use Multiplier & Dilution Factor with ISTDs

Signal 1: VWD1 A, Wavelength=220 nm

| Peak # | RetTime [min] | Type | Width [min] | Area mAU *s | Height [mAU] | Area %  |
|--------|---------------|------|-------------|-------------|--------------|---------|
| 1      | 18.070        | MM   | 0.4498      | 1.43100e4   | 530.19403    | 98.4018 |
| 2      | 19.146        | MM   | 0.3648      | 232.41402   | 10.61706     | 1.5982  |

Totals : 1.45424e4 540.81109

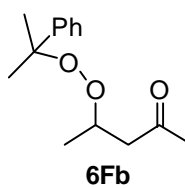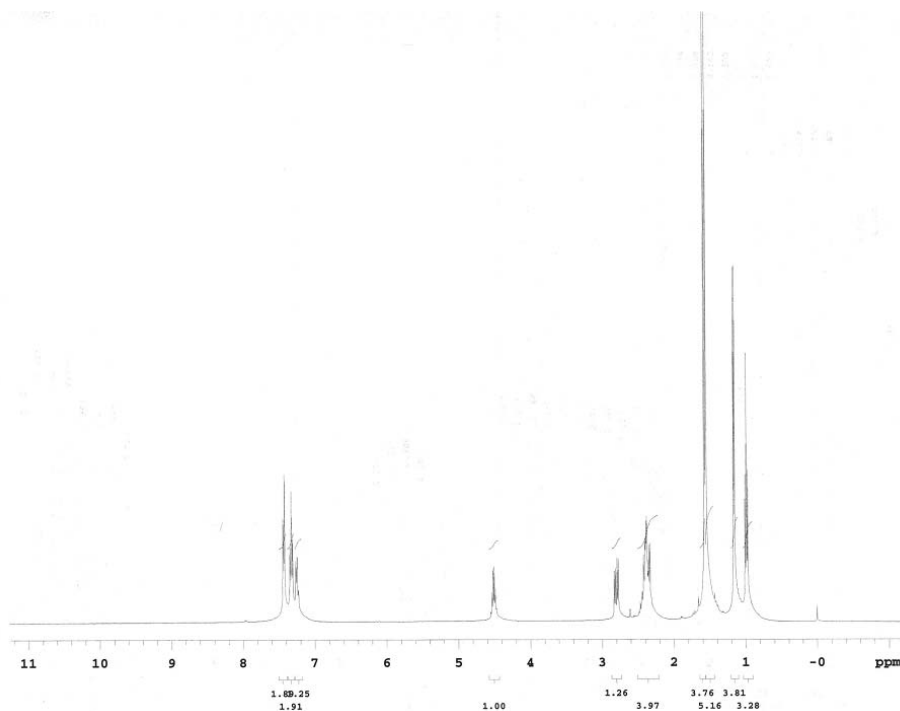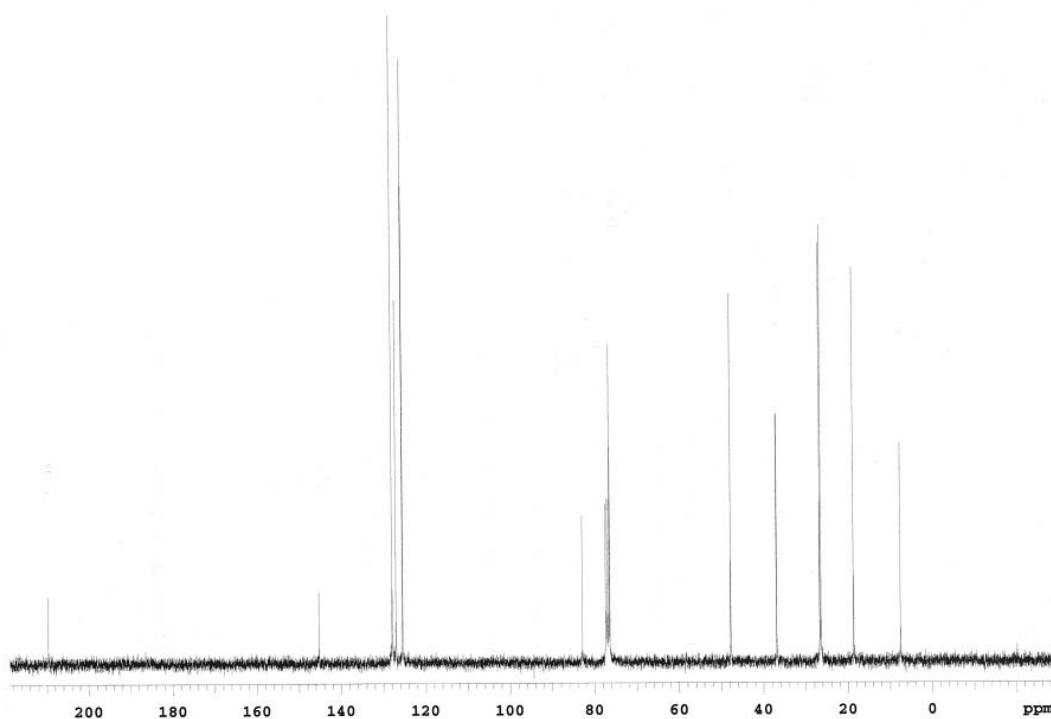

HPLC, Daicel Chiralcel AD-H, AD, Hexanes / IPA = 99.7:0.3, 0.6 mL/min,  $\lambda = 220$  nm

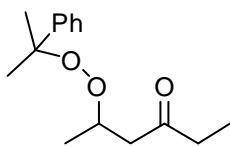

**6Fb**

mixture of Q-NH<sub>2</sub> and QD-NH<sub>2</sub>  
catalyzed reaction

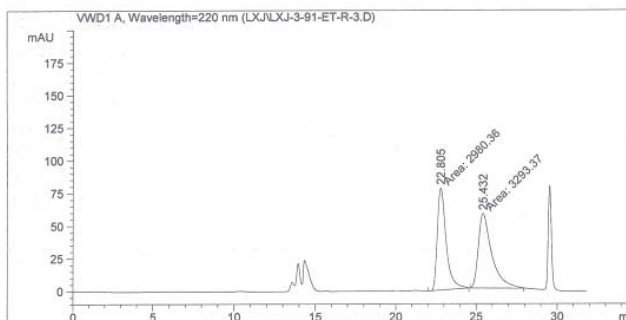

Area Percent Report

Sorted By : Signal  
Multiplier : 1.0000  
Dilution : 1.0000  
Sample Amount : 1.00000 [ng/ul] (not used in calc.)  
Use Multiplier & Dilution Factor with ISTDs

Signal 1: VWD1 A, Wavelength=220 nm

| Peak # | RetTime [min] | Type | Width [min] | Area mAU*s | Height [mAU] | Area %  |
|--------|---------------|------|-------------|------------|--------------|---------|
| 1      | 22.805        | MM   | 0.6364      | 2980.35669 | 78.04903     | 47.5054 |
| 2      | 25.432        | MM   | 0.9600      | 3293.37085 | 57.17882     | 52.4946 |

Totals : 6273.72754 135.22784

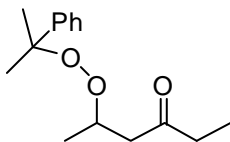

**6Fb**

94% ee obtained from Q-N  
catalyzed reaction

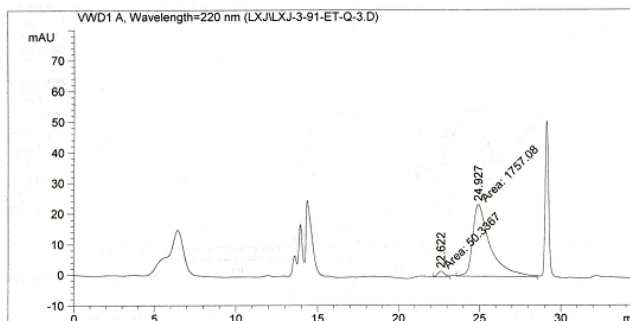

Area Percent Report

Sorted By : Signal  
Multiplier : 1.0000  
Dilution : 1.0000  
Sample Amount : 1.00000 [ng/ul] (not used in calc.)  
Use Multiplier & Dilution Factor with ISTDs

Signal 1: VWD1 A, Wavelength=220 nm

| Peak # | RetTime [min] | Type | Width [min] | Area mAU*s | Height [mAU] | Area %  |
|--------|---------------|------|-------------|------------|--------------|---------|
| 1      | 22.622        | MM   | 0.4709      | 50.33667   | 1.78161      | 2.7850  |
| 2      | 24.927        | MM   | 1.2465      | 1757.08032 | 23.49428     | 97.2150 |

Totals : 1807.41699 25.27589

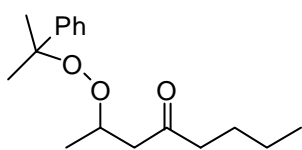

6Hb

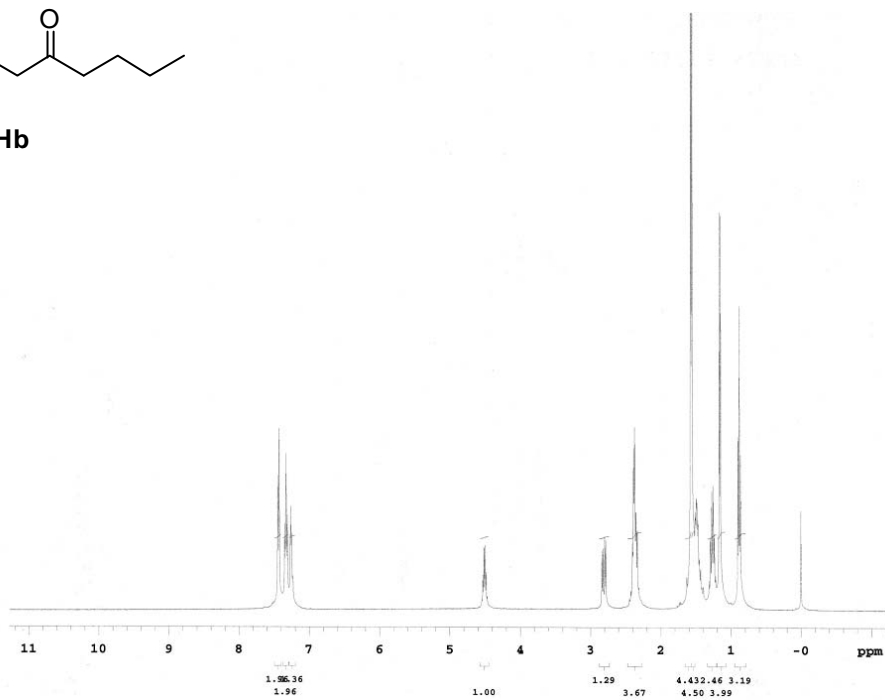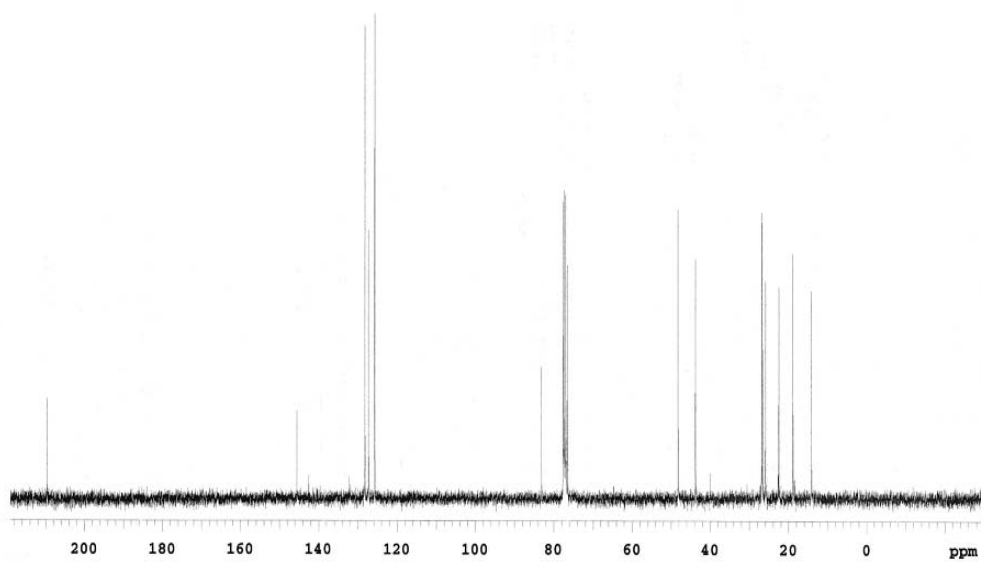



HPLC, Daicel Chiralcel AD, AD-H, Hexanes / IPA = 99.5:0.5, 0.4ml/min,  $\lambda = 220$  nm

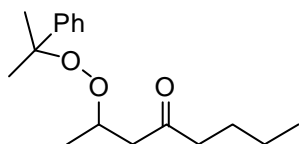

**6Hb**

mixture of Q-NH<sub>2</sub> and QD-NH<sub>2</sub>  
catalyzed reaction

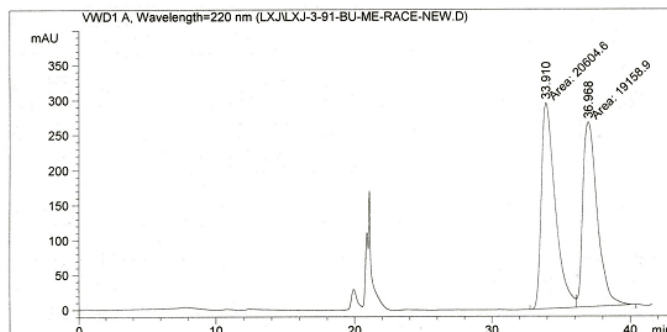

Area Percent Report

Sorted By : Signal  
Multiplier : 1.0000  
Dilution : 1.0000  
Sample Amount : 1.00000 [ng/ul] (not used in calc.)  
Use Multiplier & Dilution Factor with ISTDs

Signal 1: VWD1 A, Wavelength=220 nm

| Peak #   | RetTime [min] | Type | Width [min] | Area mAU *s | Height [mAU] | Area %  |
|----------|---------------|------|-------------|-------------|--------------|---------|
| 1        | 33.910        | MF   | 1.1657      | 2.06046e4   | 294.60797    | 51.8178 |
| 2        | 36.968        | FM   | 1.2074      | 1.91589e4   | 264.47162    | 48.1822 |
| Totals : |               |      |             | 3.97635e4   | 559.07959    |         |

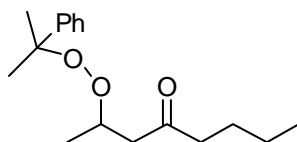

**6Hb**

96% ee obtained from Q-NH<sub>2</sub>  
catalyzed reaction

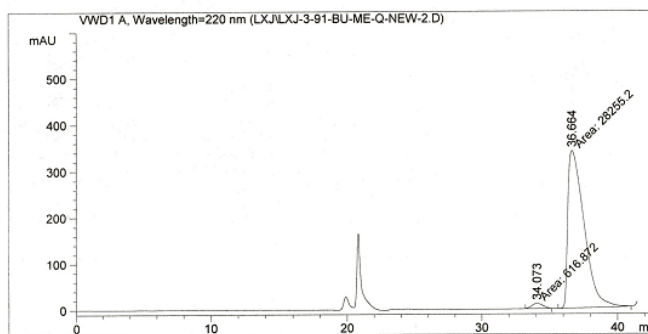

Area Percent Report

Sorted By : Signal  
Multiplier : 1.0000  
Dilution : 1.0000  
Sample Amount : 1.00000 [ng/ul] (not used in calc.)  
Use Multiplier & Dilution Factor with ISTDs

Signal 1: VWD1 A, Wavelength=220 nm

| Peak #   | RetTime [min] | Type | Width [min] | Area mAU *s | Height [mAU] | Area %  |
|----------|---------------|------|-------------|-------------|--------------|---------|
| 1        | 34.073        | MM   | 0.9375      | 616.87158   | 10.96646     | 2.1366  |
| 2        | 36.664        | MM   | 1.3842      | 2.82552e4   | 340.20645    | 97.8634 |
| Totals : |               |      |             | 2.88721e4   | 351.17291    |         |

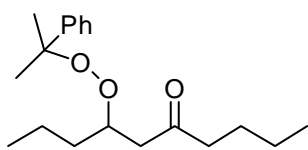

6b

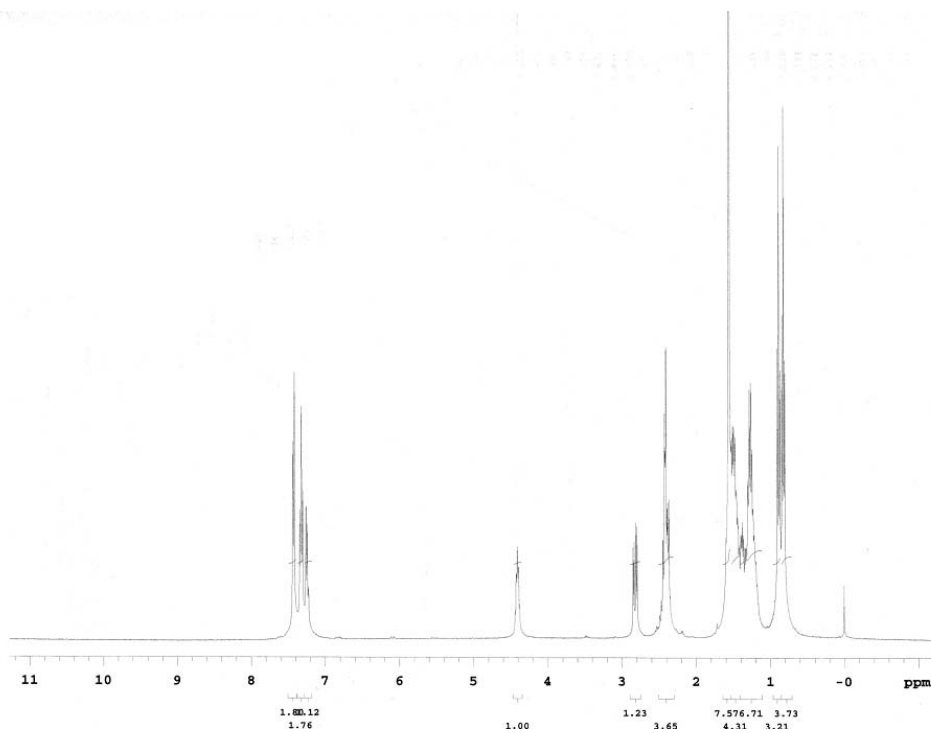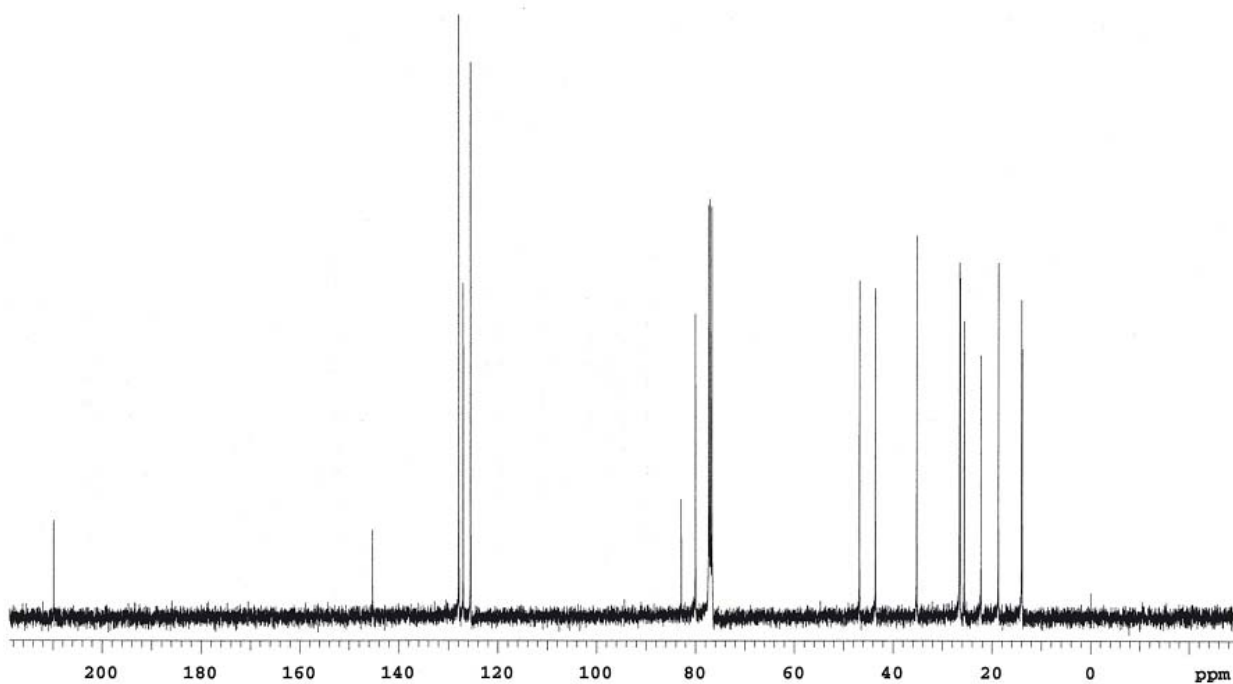

HPLC, Daicel Chiralcel AD, AD-H, Hexanes / IPA = 99.5:0.5, 0.4ml/min,  $\lambda = 220$  nm

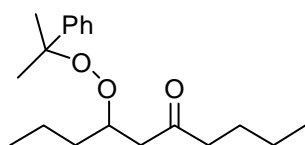

**6b**

mixture of Q-NH<sub>2</sub> and QD-NH<sub>2</sub>  
catalyzed reaction

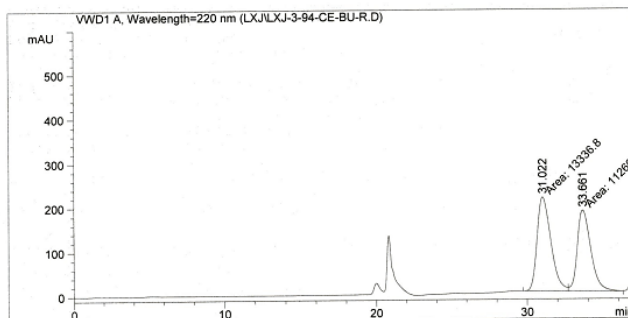

Area Percent Report

Sorted By : Signal  
Multiplier : 1.0000  
Dilution : 1.0000  
Sample Amount : 1.00000 [ng/ul] (not used in calc.)  
Use Multiplier & Dilution Factor with ISTDs

Signal 1: VWD1 A, Wavelength=220 nm

| Peak # | RetTime [min] | Type | Width [min] | Area [mAU*s] | Height [mAU] | Area %  |
|--------|---------------|------|-------------|--------------|--------------|---------|
| 1      | 31.022        | MF   | 1.0492      | 1.33368e4    | 211.86626    | 54.2197 |
| 2      | 33.661        | FM   | 1.0290      | 1.12609e4    | 182.38411    | 45.7803 |

Totals : 2.45977e4 394.25037

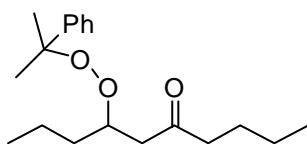

**6b**

97% ee obtained from Q-NH<sub>2</sub>  
catalyzed reaction

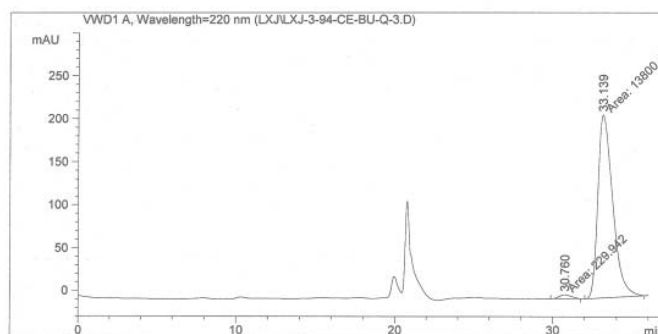

Area Percent Report

Sorted By : Signal  
Multiplier : 1.0000  
Dilution : 1.0000  
Sample Amount : 1.00000 [ng/ul] (not used in calc.)  
Use Multiplier & Dilution Factor with ISTDs

Signal 1: VWD1 A, Wavelength=220 nm

| Peak # | RetTime [min] | Type | Width [min] | Area [mAU*s] | Height [mAU] | Area %  |
|--------|---------------|------|-------------|--------------|--------------|---------|
| 1      | 30.760        | MM   | 0.8680      | 229.94171    | 4.41534      | 1.6389  |
| 2      | 33.139        | MM   | 1.0801      | 1.38004e4    | 212.94423    | 98.3611 |

Totals : 1.40303e4 217.35957

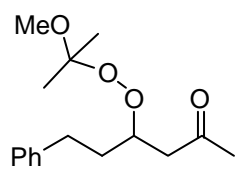

6Ac

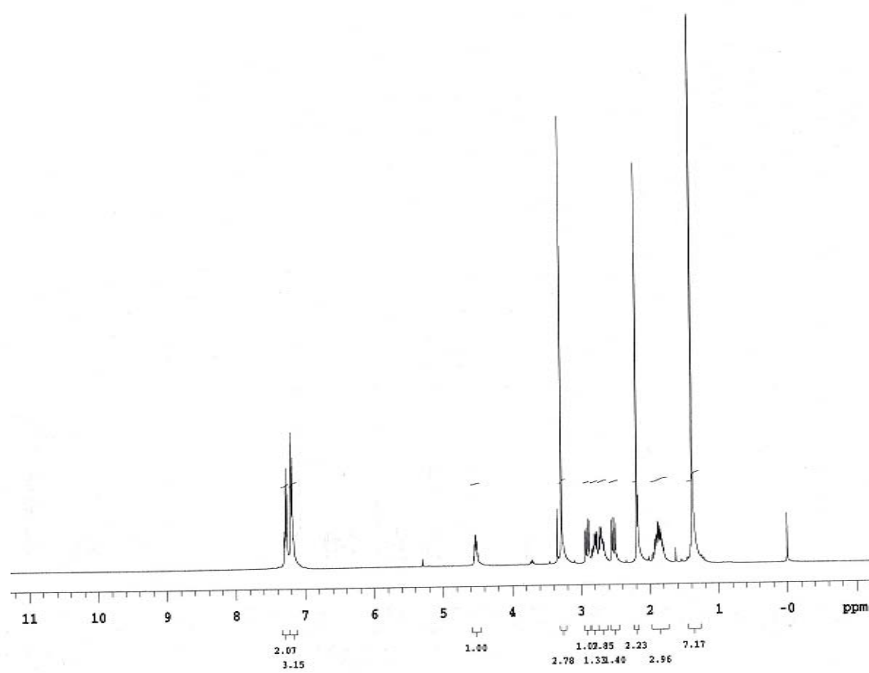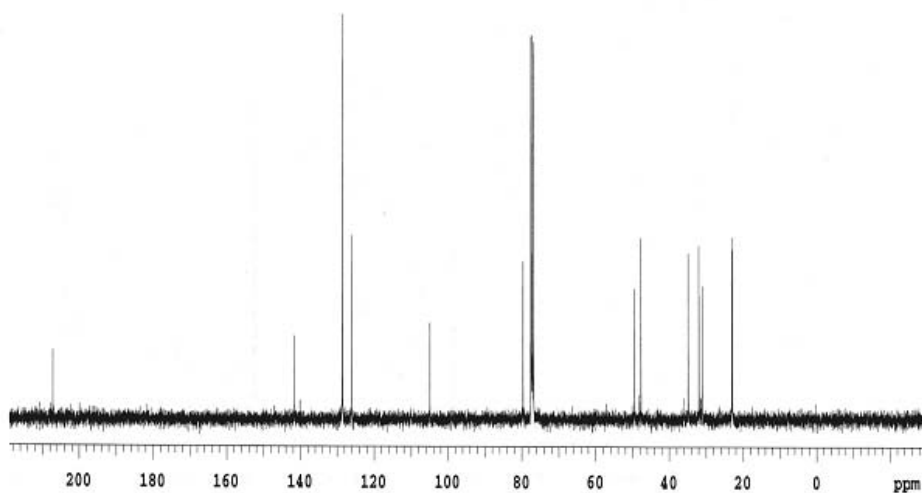

HPLC, Daicel Chiralcel AD-H, Hexanes / IPA = 99:1, 1 mL/min,  $\lambda = 220$  nm

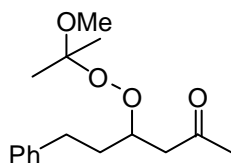

**6Ac**

mixture of Q-NH<sub>2</sub> and QD-NH catalyzed reaction

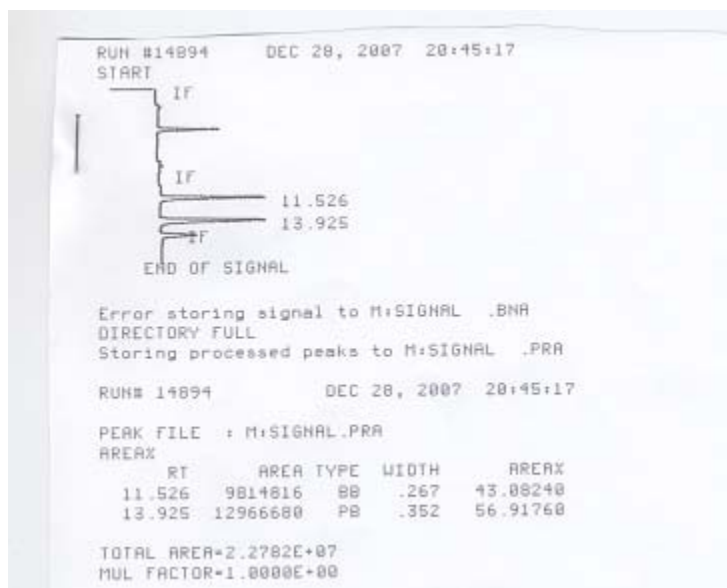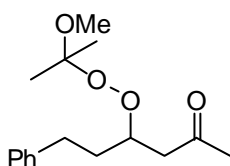

**6Ac**

92%ee, obtained from Q-NH<sub>2</sub> catalyzed reaction

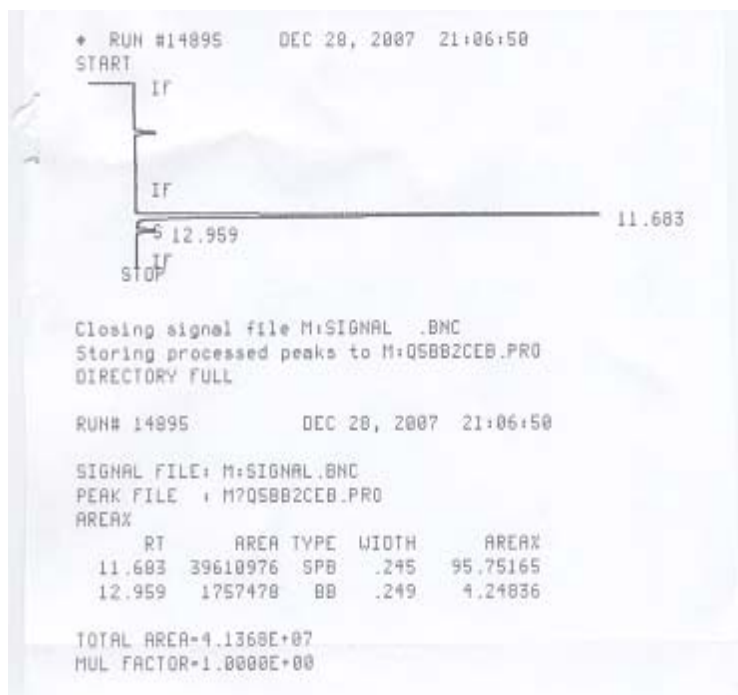

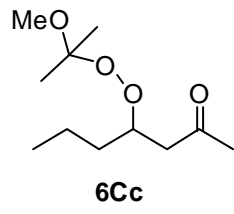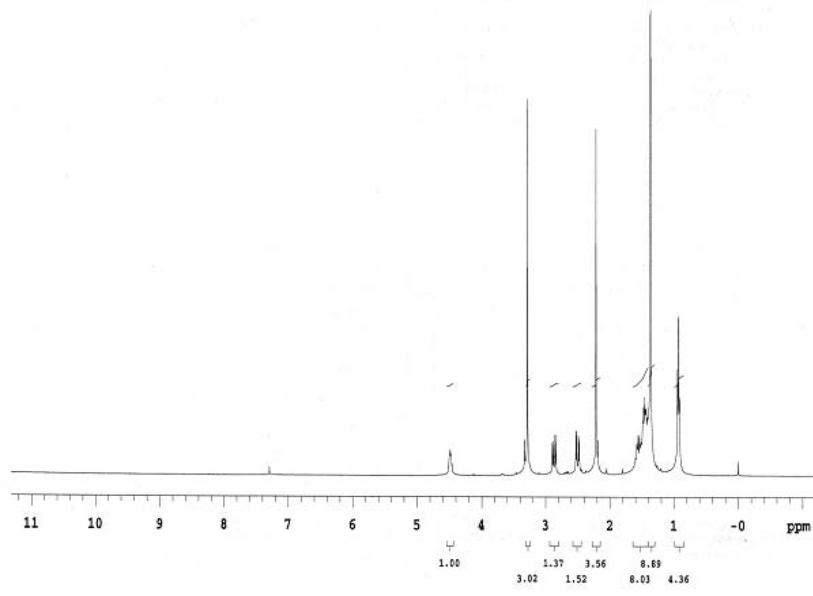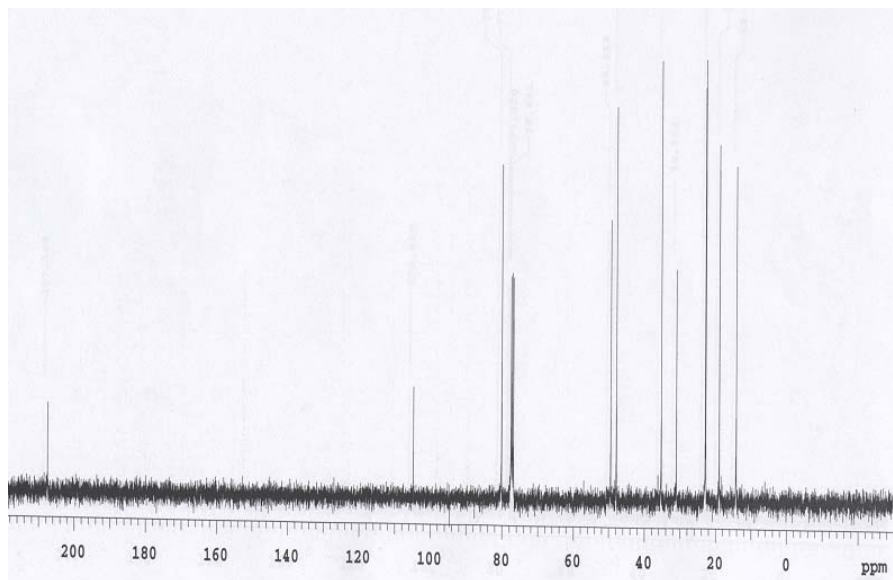

Chiral GC HP Chiral(20% Permethyated  $\beta$ -Cyclodextrin, 30m x 0.25 mm), Inject Temp: 240°C,  
 Fid Temp: 260°C, Inlet pressure 10 psi. Oven Temp, 50°C 5min, 2.5°C/min, 100°C

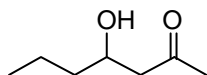

mixture of Q-NH<sub>2</sub> and QD-NH<sub>2</sub>  
 catalyzed reaction

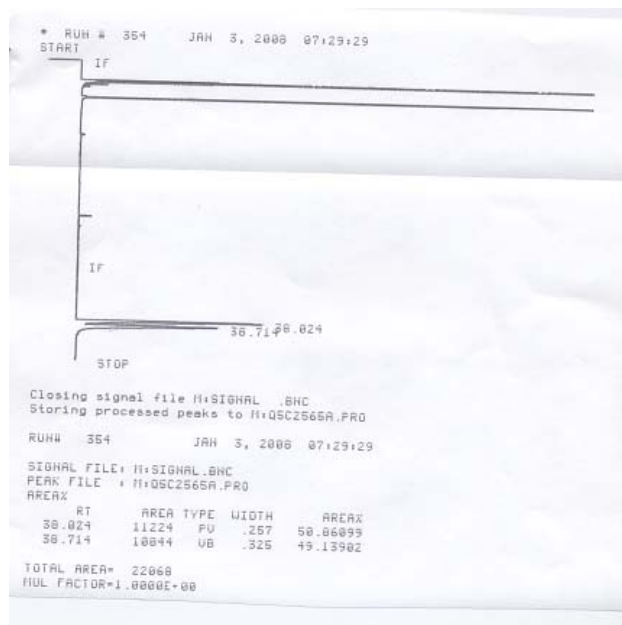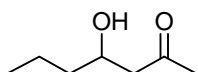

95%ee, obtained from Q-NH<sub>2</sub>  
 catalyzed reaction

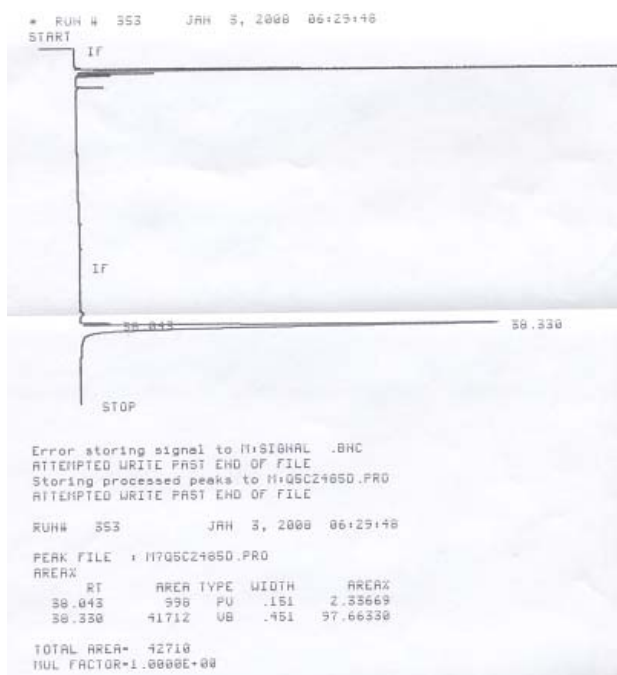

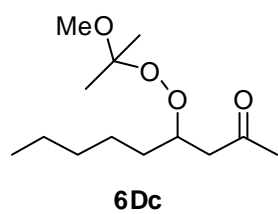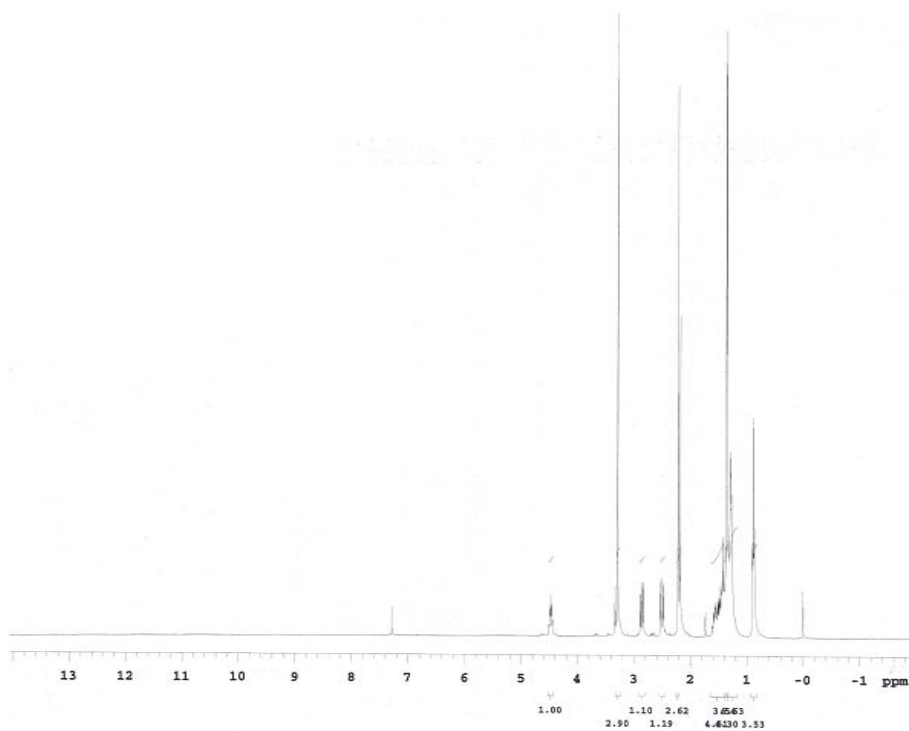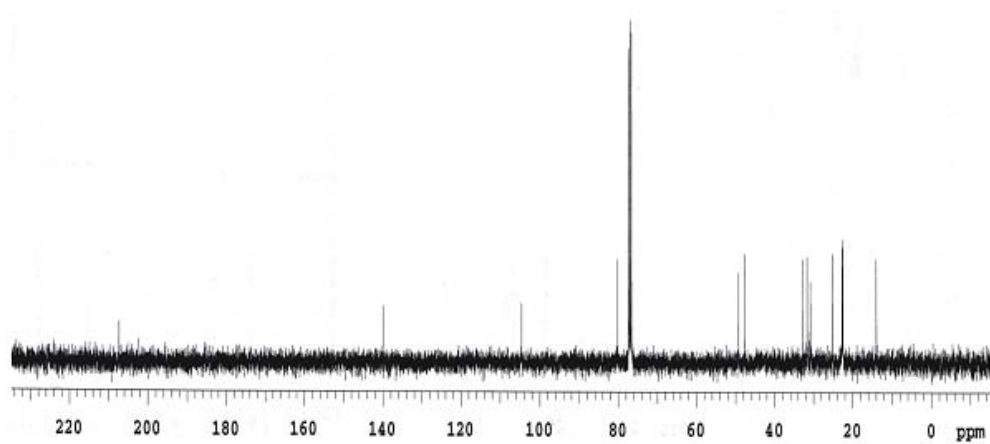



Chiral GC HP Chiral(20% Permethyated  $\beta$ -Cyclodextrin, 30m x 0.25 mm), Inject Temp: 240°C,  
 Fid Temp: 260°C, Inlet pressure 10 psi. Oven Temp, 50°C 5min, 5°C/min, 100°C

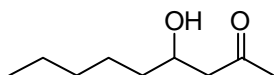

mixture of Q-NH<sub>2</sub> and QD-NH<sub>2</sub>  
 catalyzed reaction

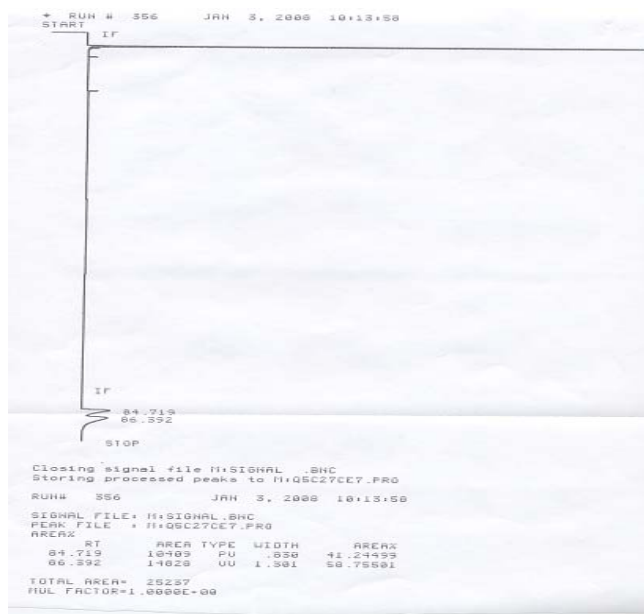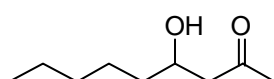

95%ee, obtained from Q-NH<sub>2</sub>  
 catalyzed reaction

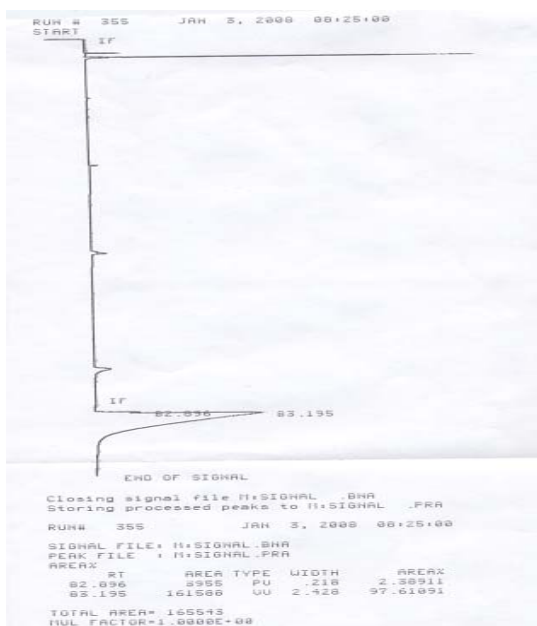

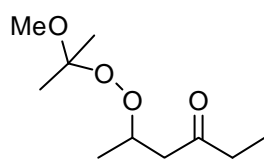

6Fc

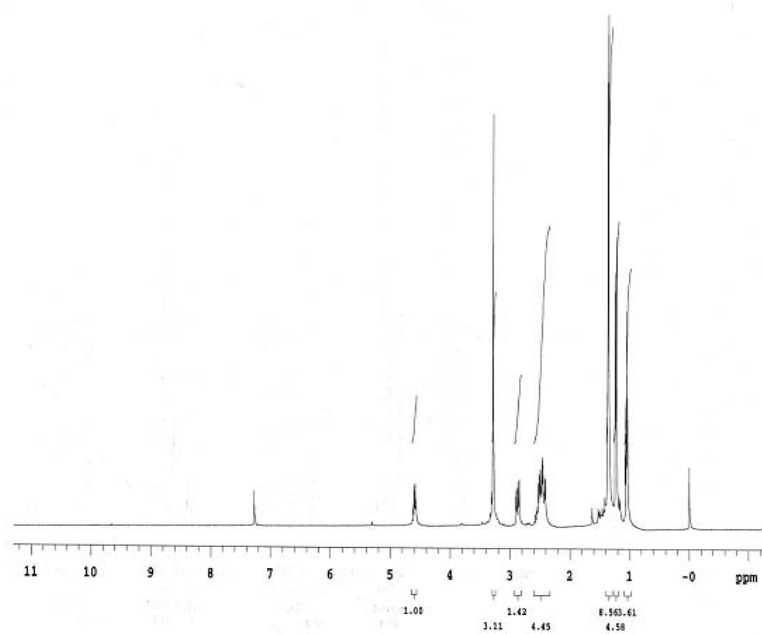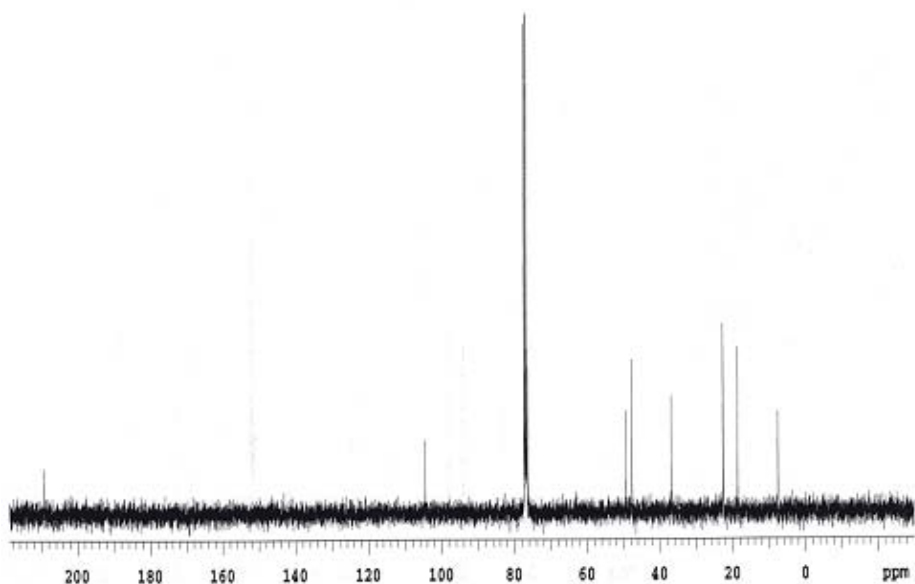

Chiral GC HP Chiral(20% Permethyated  $\beta$ -Cyclodextrin, 30m x 0.25 mm), Inject Temp: 250°C,  
 Fid Temp: 220°C, Inlet pressure 13 psi. Oven Temp: 85°C

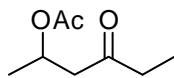

mixture of Q-NH<sub>2</sub> and QD-NH<sub>2</sub>  
 catalyzed reaction

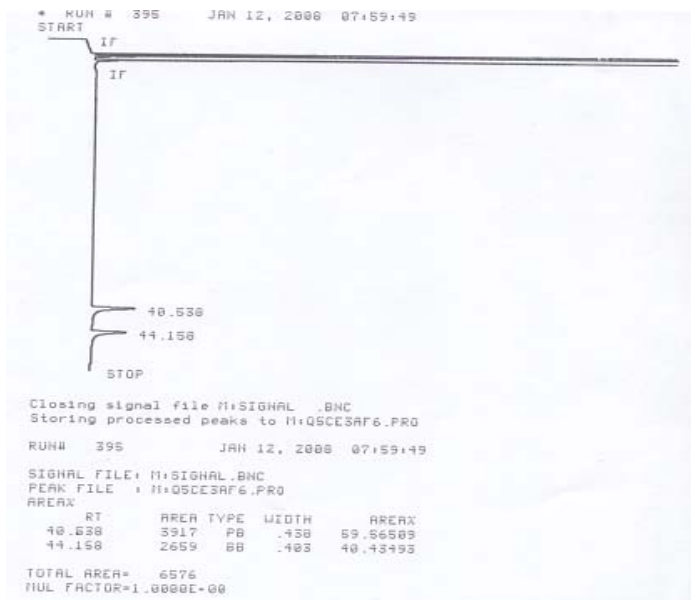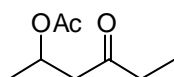

95%ee, obtained from  
 Q-NH<sub>2</sub> catalyzed reaction

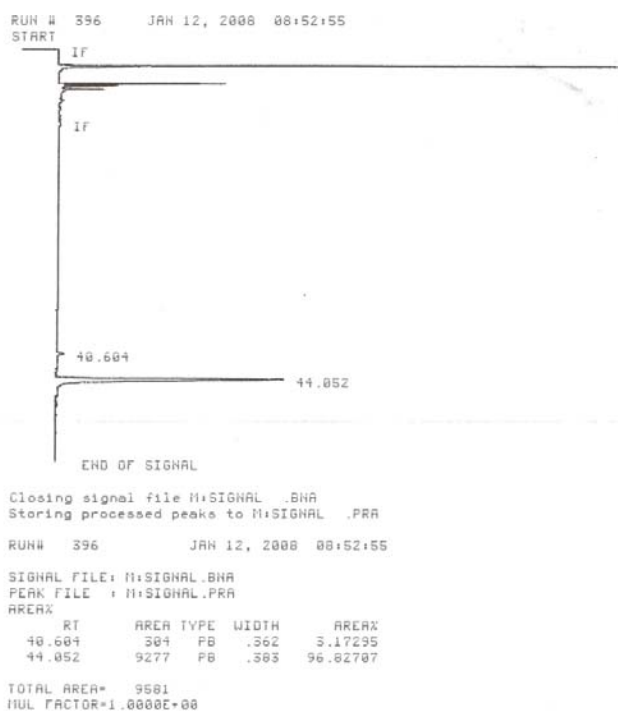

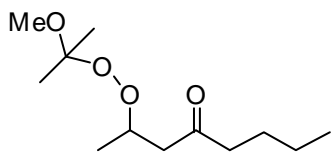

6Hc

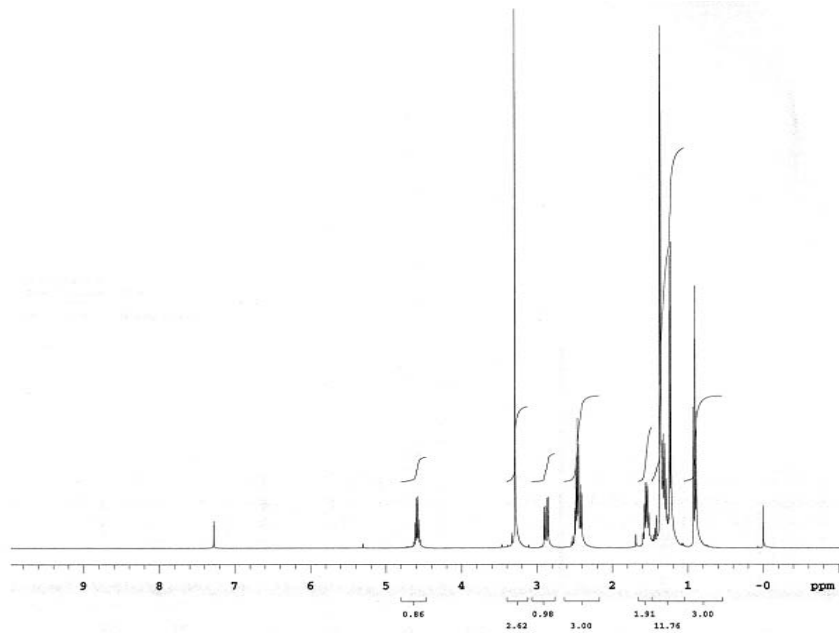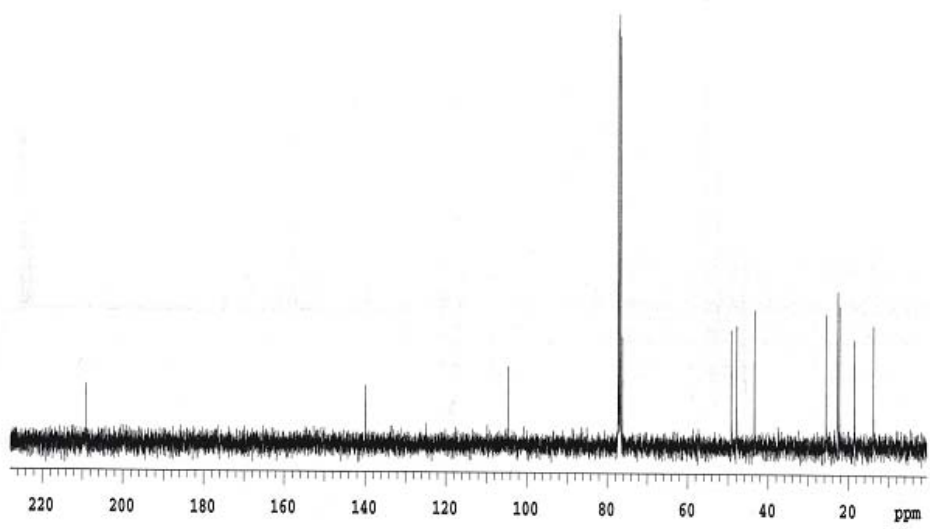

Chiral GC HP Chiral(20% Permethylated  $\beta$ -Cyclodextrin, 30m x 0.25 mm), Inject Temp: 250°C,  
 Fid Temp: 220°C, Inlet pressure 13 psi, Oven Temp: 110°C

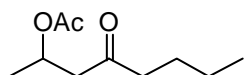

mixture of Q-NH<sub>2</sub> and QD-NH<sub>2</sub>  
 catalyzed reaction

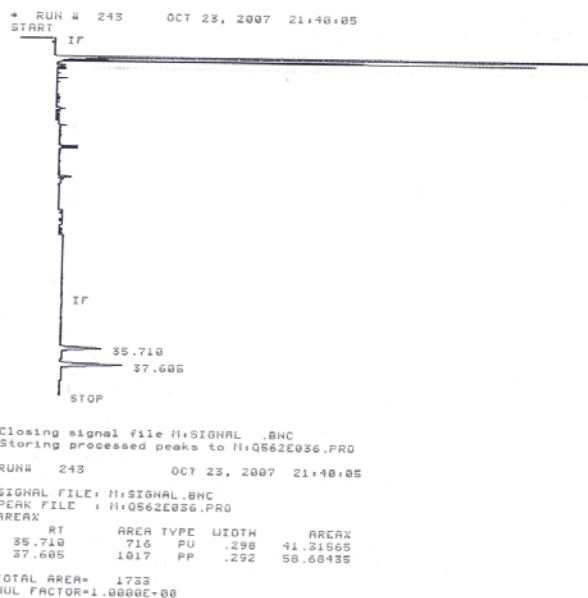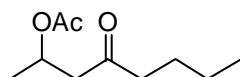

94%ee, obtained from Q-NH<sub>2</sub>  
 catalyzed reaction

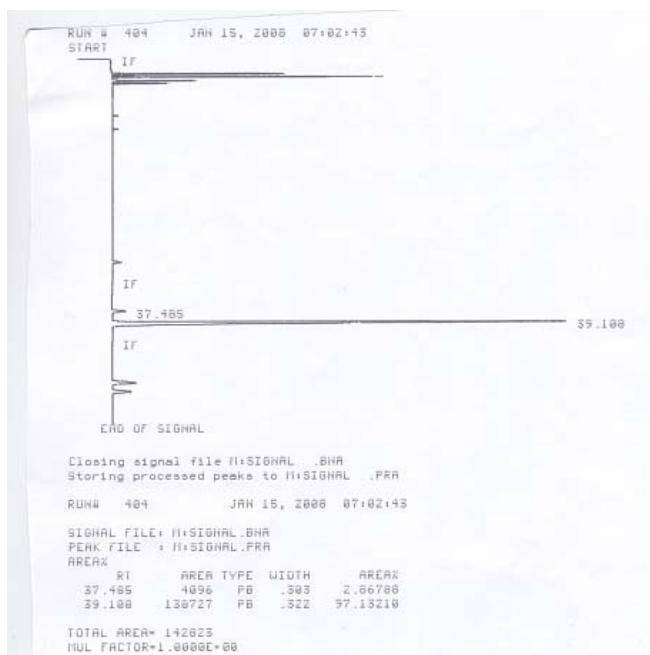

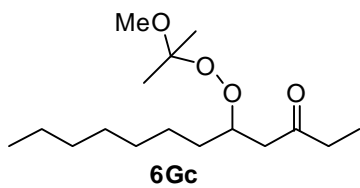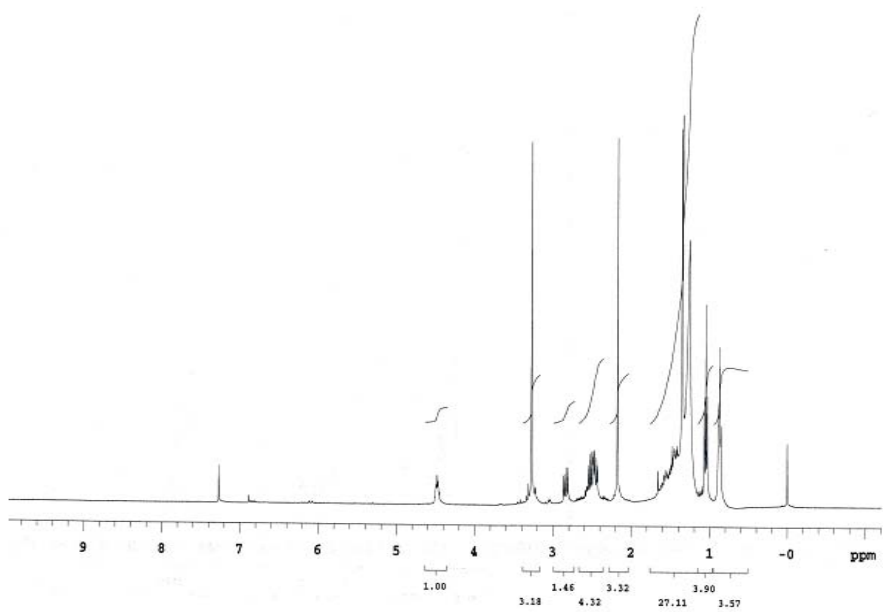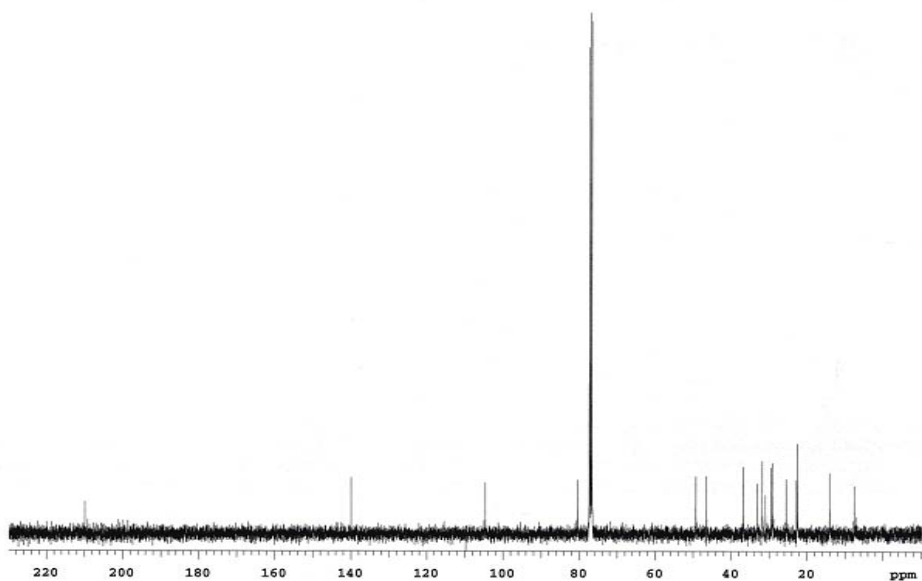

HPLC, (R,R)Whelk-O 1, Hexanes / IPA = 99:1, 1 mL/min,  $\lambda = 220$  nm

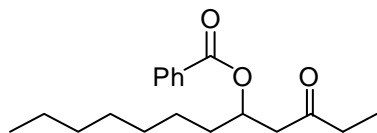

mixture of Q-NH<sub>2</sub> and QD-NH<sub>2</sub>  
catalyzed reaction

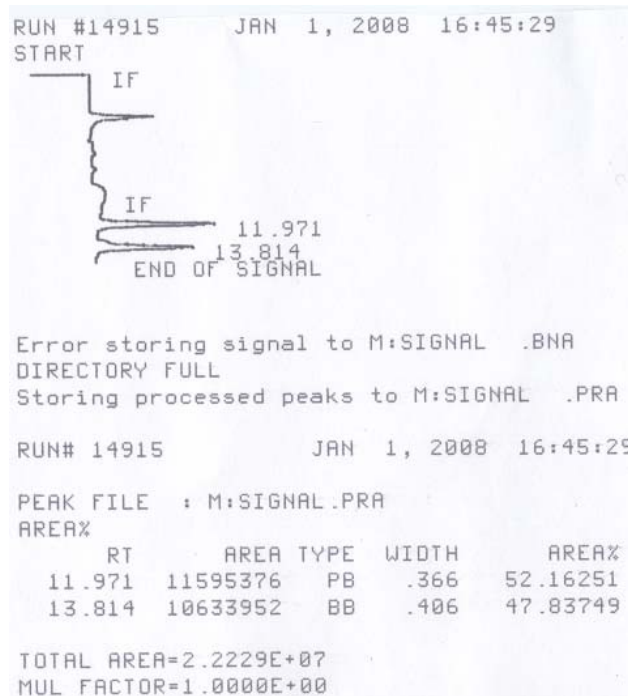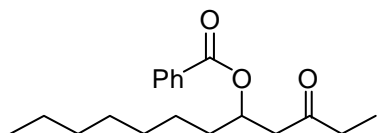

94%ee, obtained from Q-NH<sub>2</sub>  
catalyzed reaction

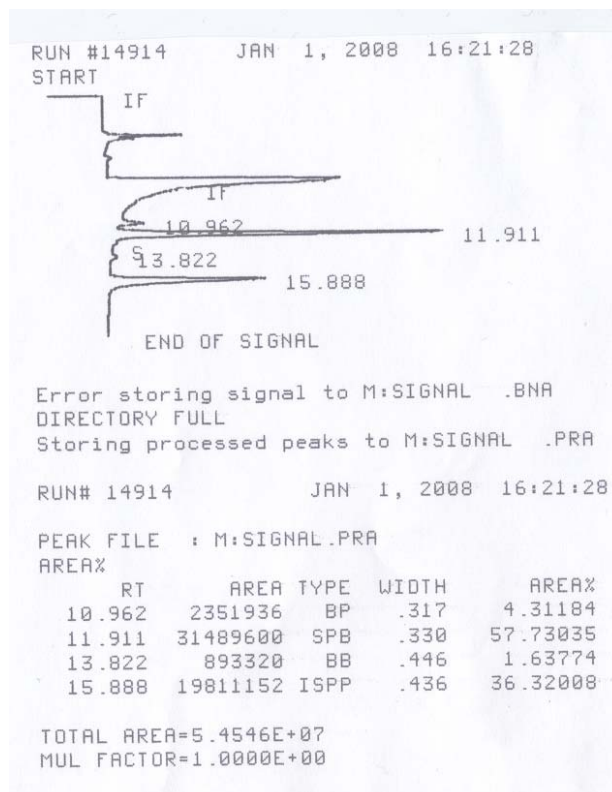

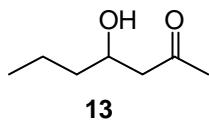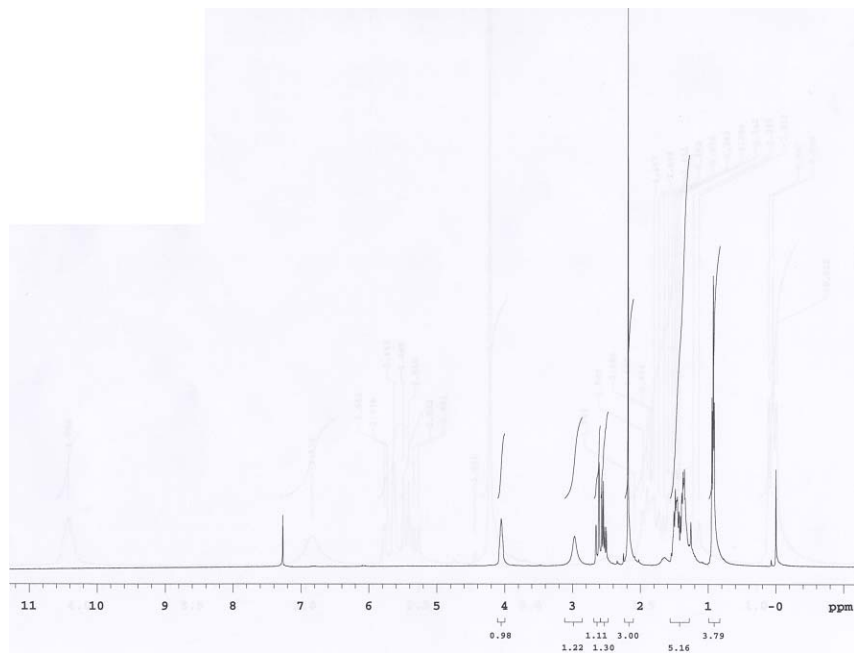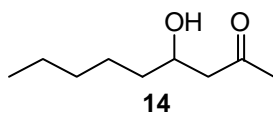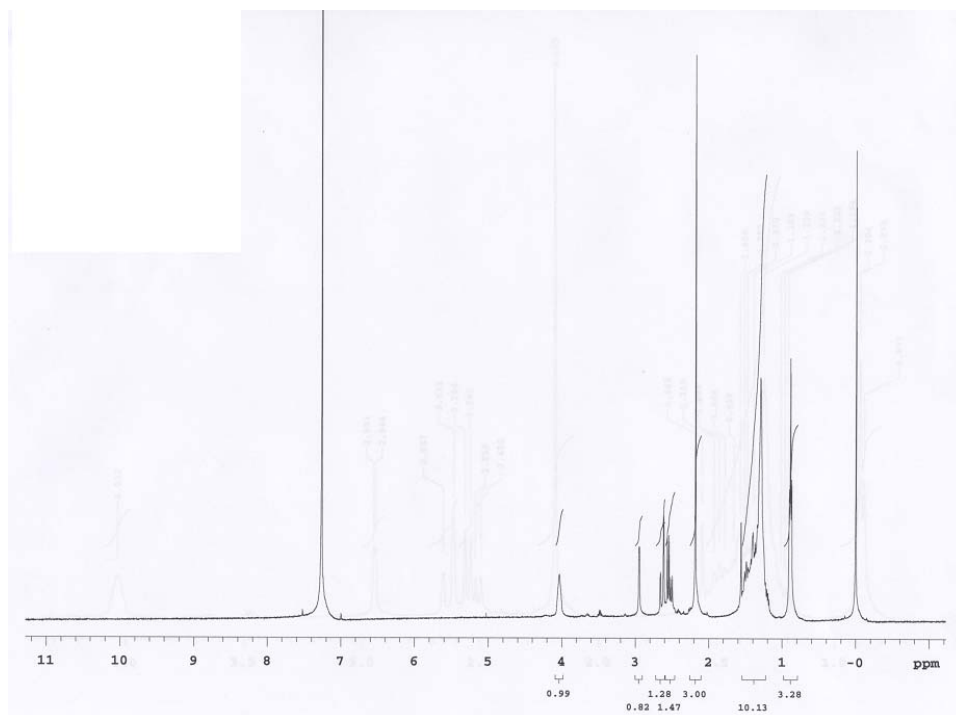



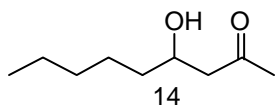

mixture of Q-NH<sub>2</sub> and QD-NH<sub>2</sub>  
catalyzed reaction

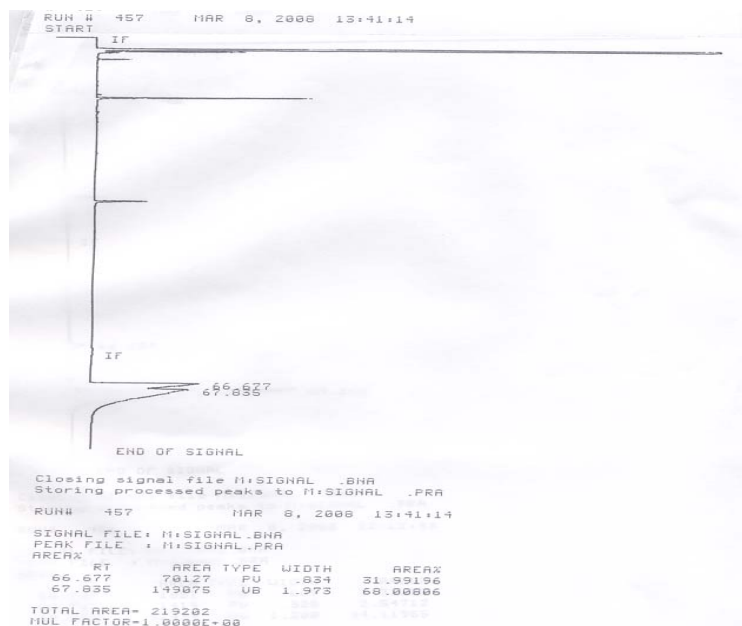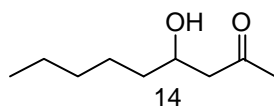

95% ee, obtained from  
Q-NH<sub>2</sub> catalyzed reaction

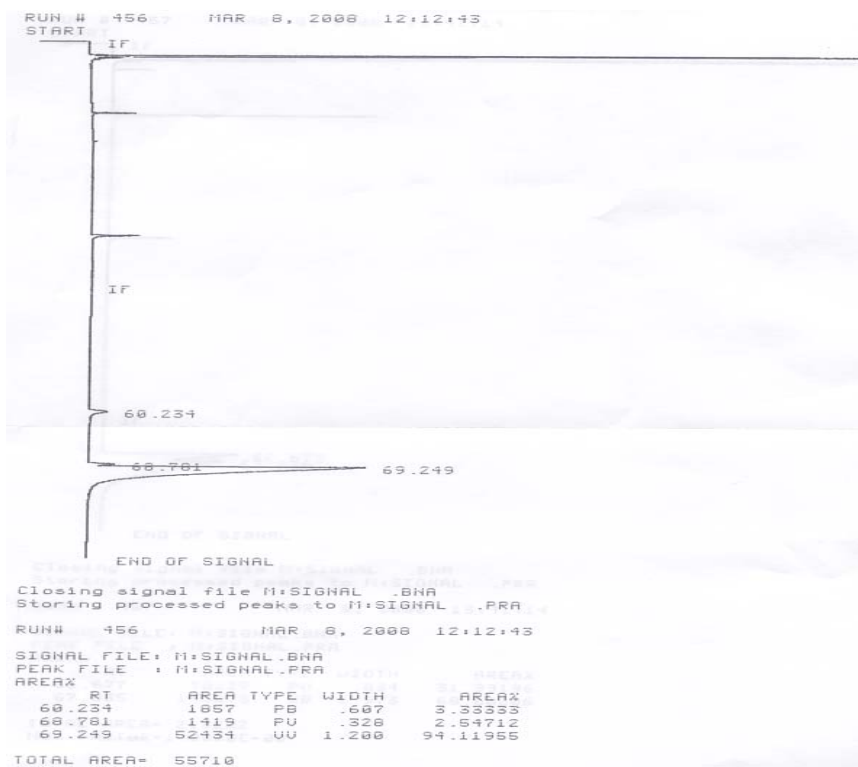

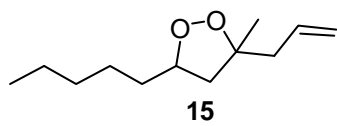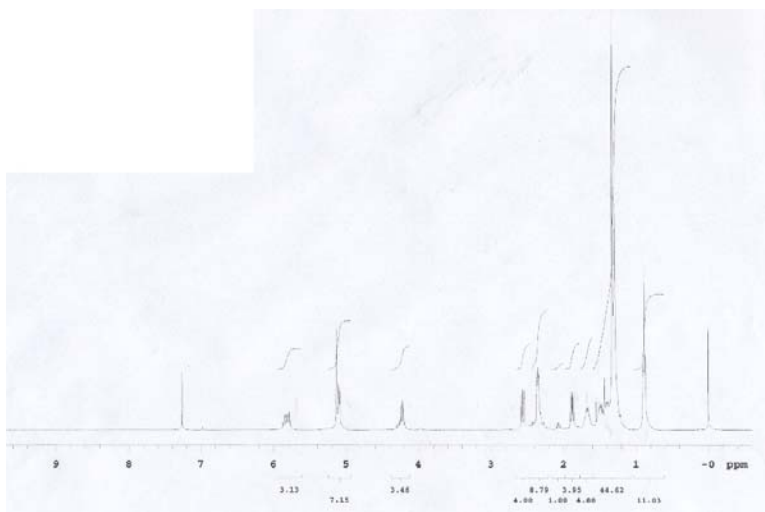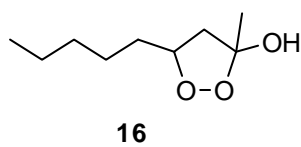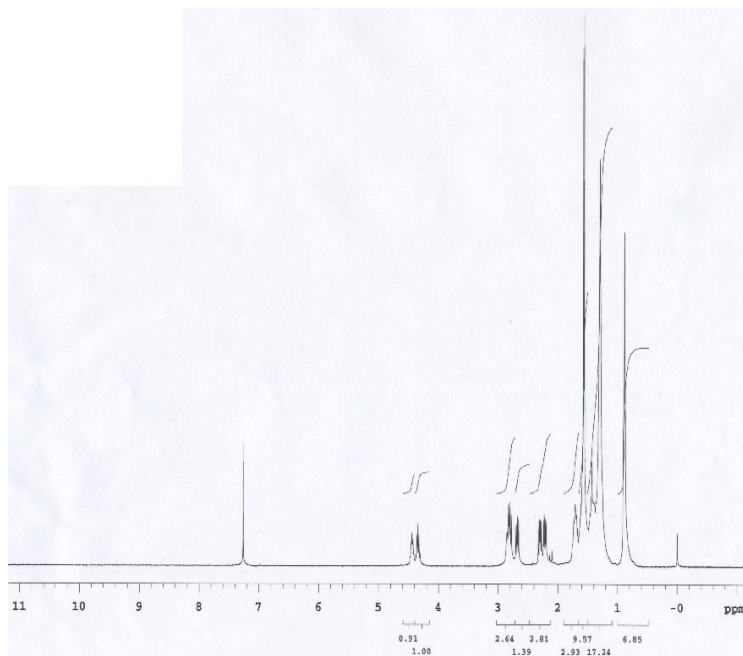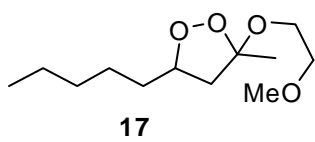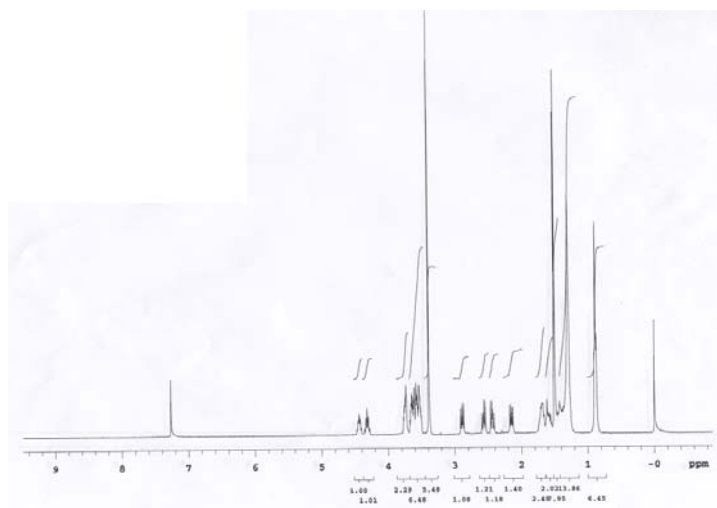

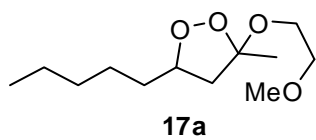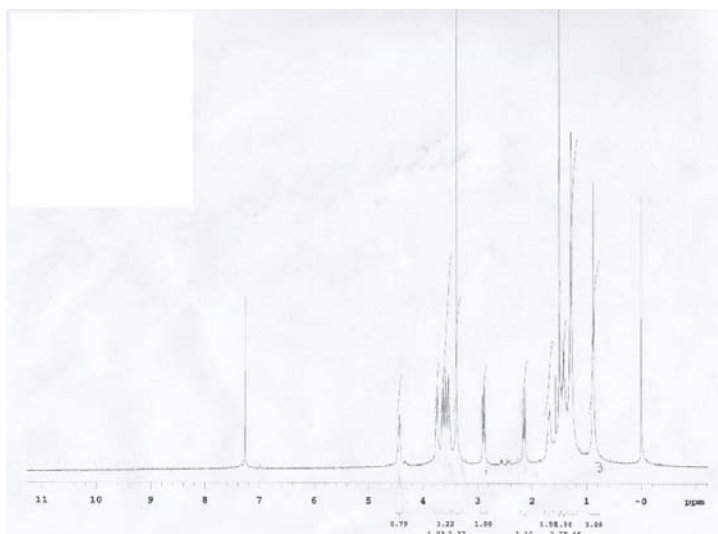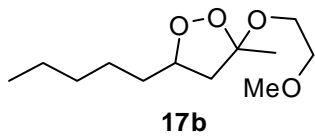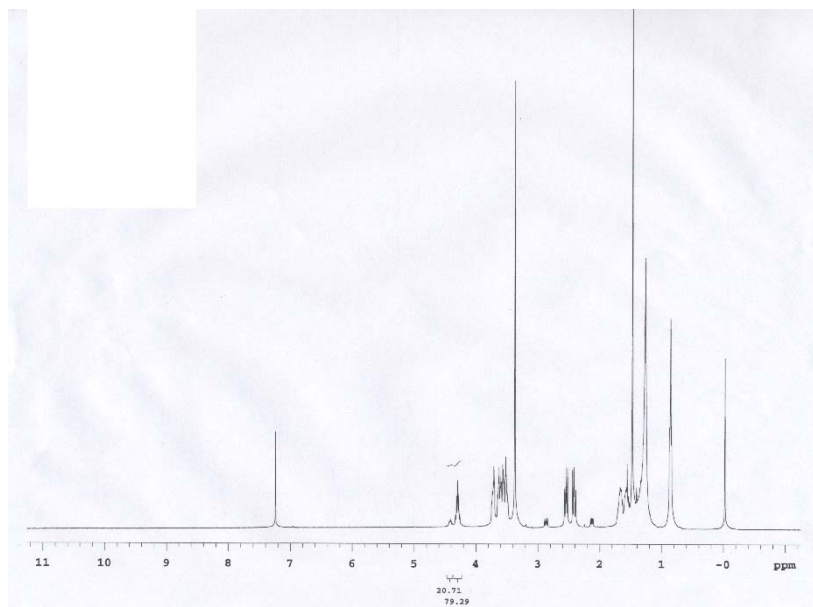

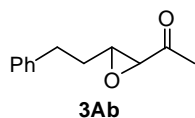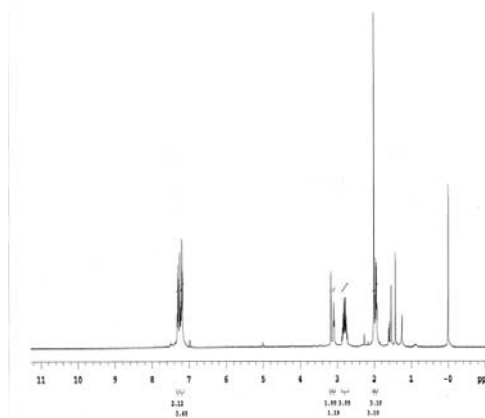

HPLC, Daicel Chiralcel AD-H, Hexanes / IPA = 99:1, 1 mL/min,  $\lambda = 220$  nm

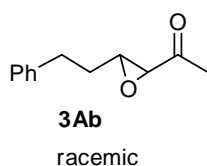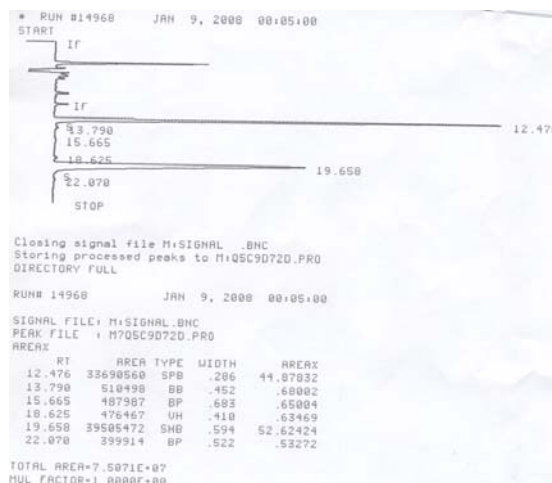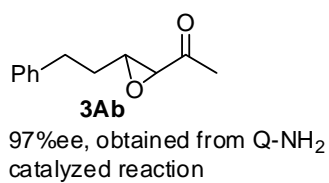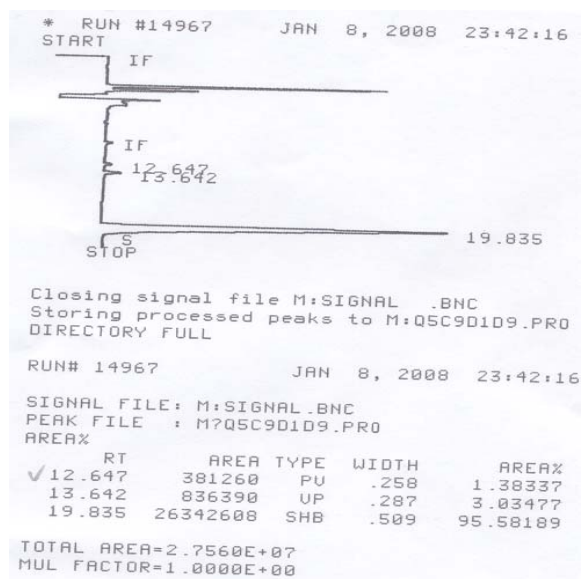

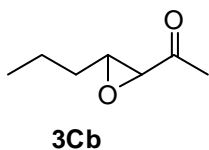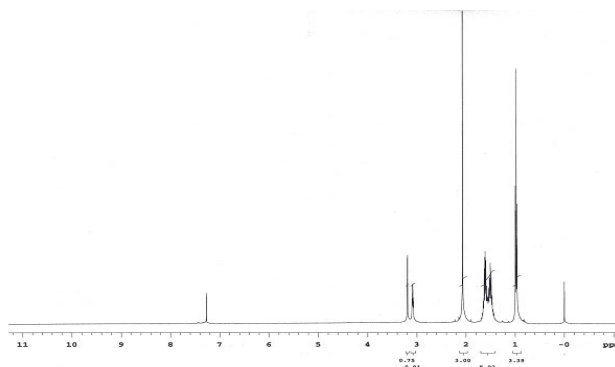

Chiral GC HP Chiral(20% Permethyated  $\beta$ -Cyclodextrin, 30m x 0.25 mm) Inject Temp: 250°C,  
Fid Temp: 260°C, Inlet pressure 13 psi. Oven Temp: 90°C

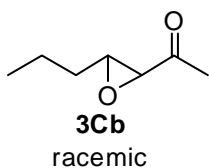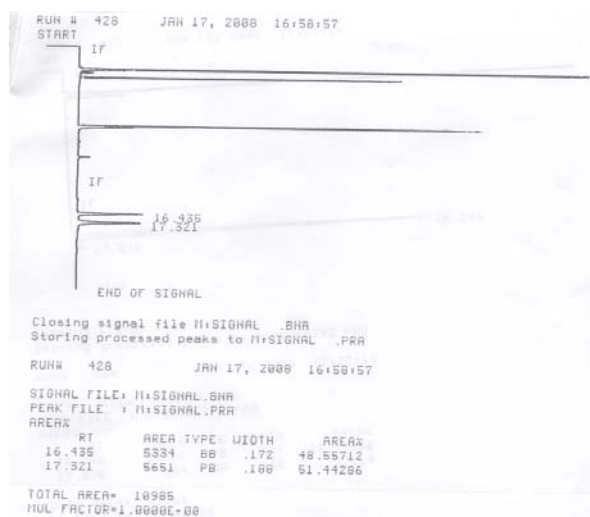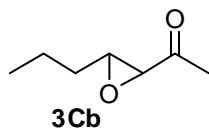

97%ee, obtained from  
Q-NH<sub>2</sub> catalyzed reaction

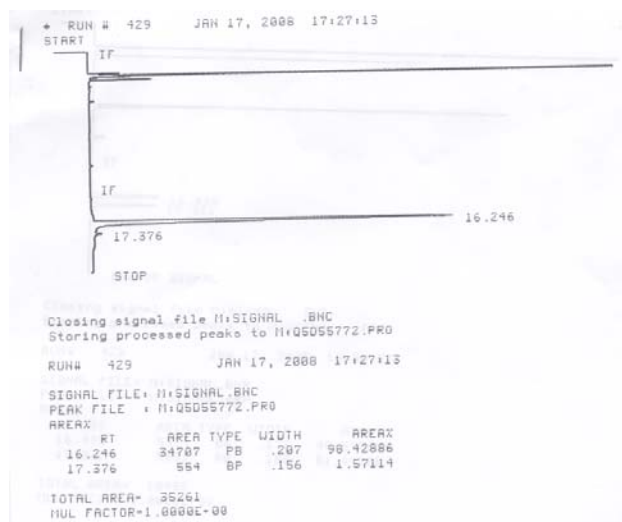

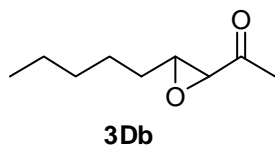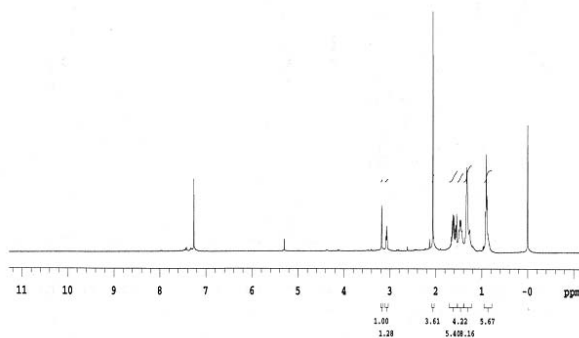

Chiral GC HP Chiral(20% Permethylated  $\beta$ -Cyclodextrin, 30m x 0.25 mm) Inject Temp: 250°C,  
 Fid Temp: 260°C, Inlet pressure 13 psi. Oven Temp: 102°C

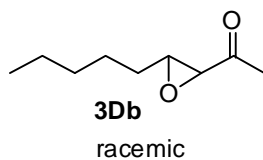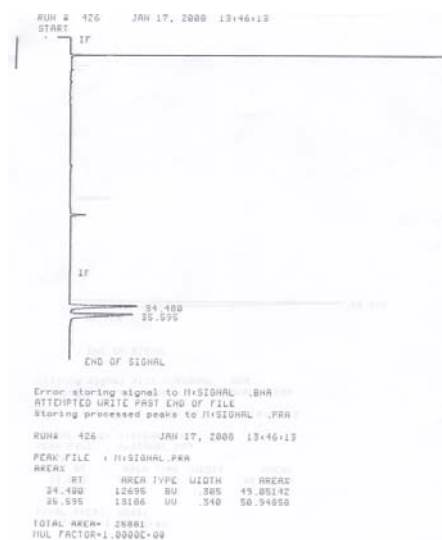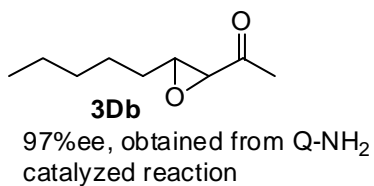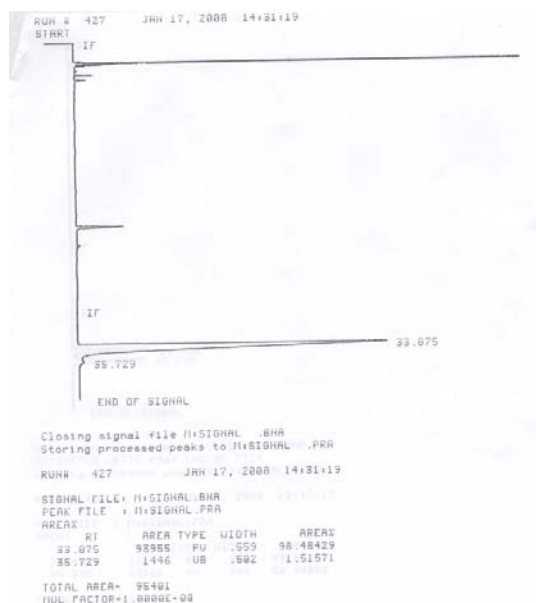

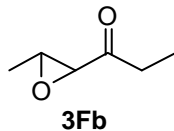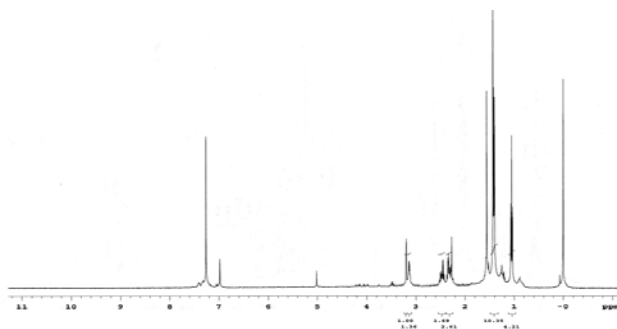

Chiral GC [HP Chiral(20% Permethylated  $\beta$ -Cyclodextrin, 30m x 0.25 mm) Inject Temp: 250°C, Fid Temp: 260°C, Inlet pressure 13 psi. Oven Temp: 73°C

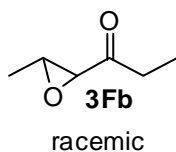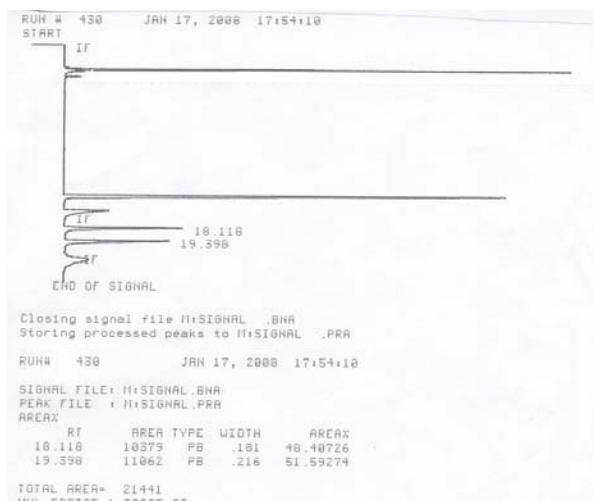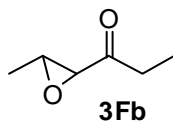

97% ee, obtained from Q-NH<sub>2</sub> catalyzed reaction

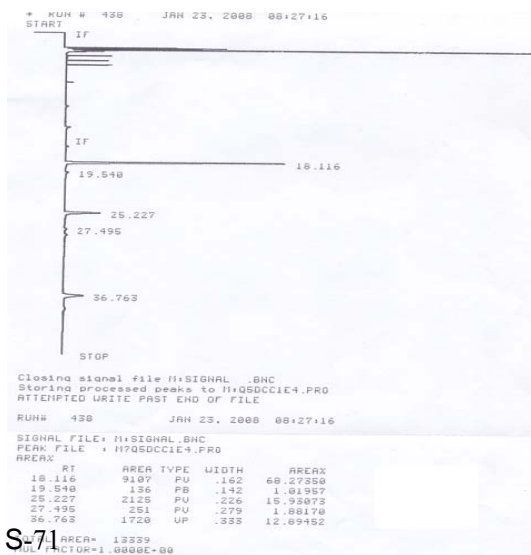

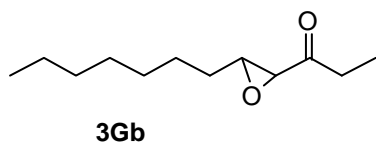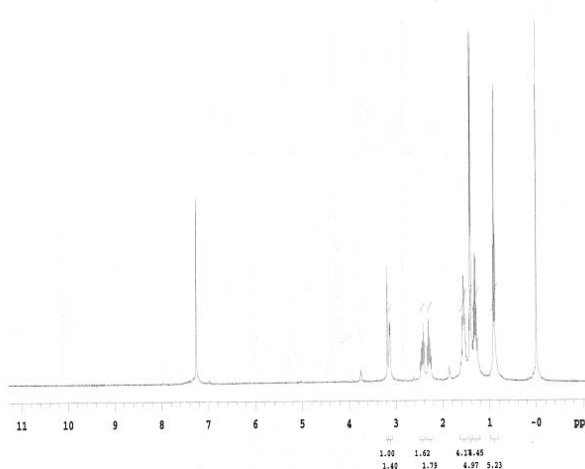

Chiral GC [HP Chiral(20% Permethylated  $\beta$ -Cyclodextrin, 30m x 0.25 mm) Inject Temp: 250°C,  
Fid Temp: 260°C, Inlet pressure 13 psi. Oven Temp: 115°C

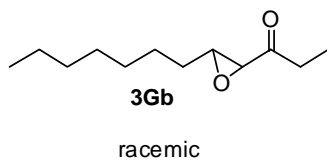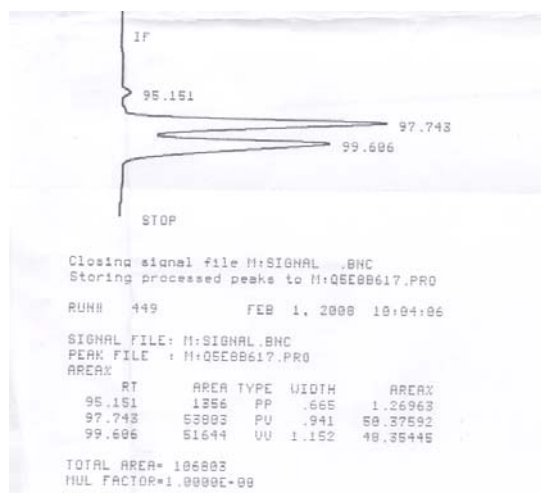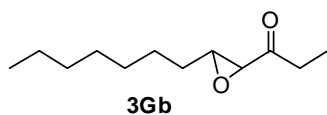

96% ee, obtained from Q-NH<sub>2</sub>  
catalyzed reaction

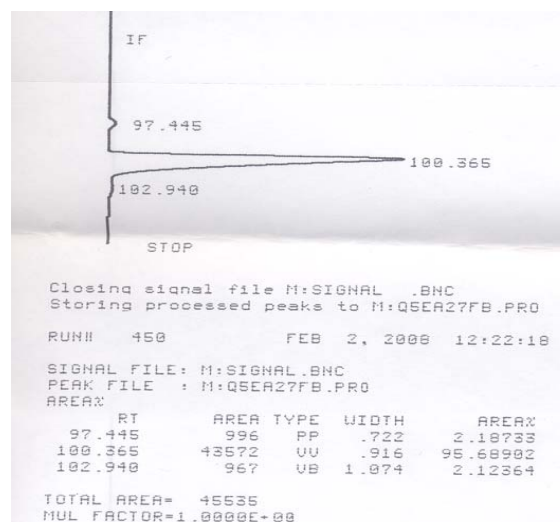



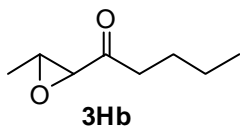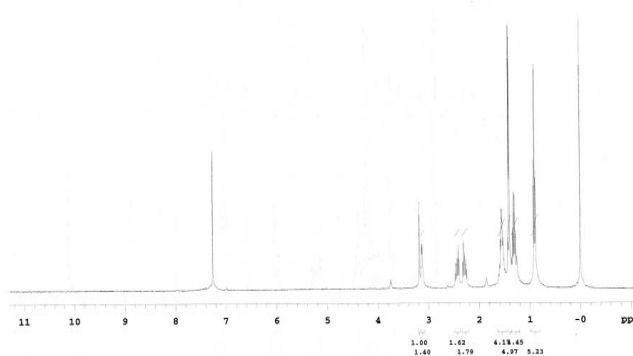

Chiral GC [HP Chiral(20% Permethyated  $\beta$ -Cyclodextrin, 30m x 0.25 mm) Inject Temp: 250°C,  
Fid Temp: 260°C, Inlet pressure 13 psi. Oven Temp: 80°C

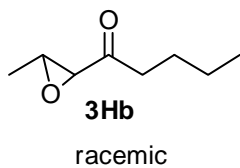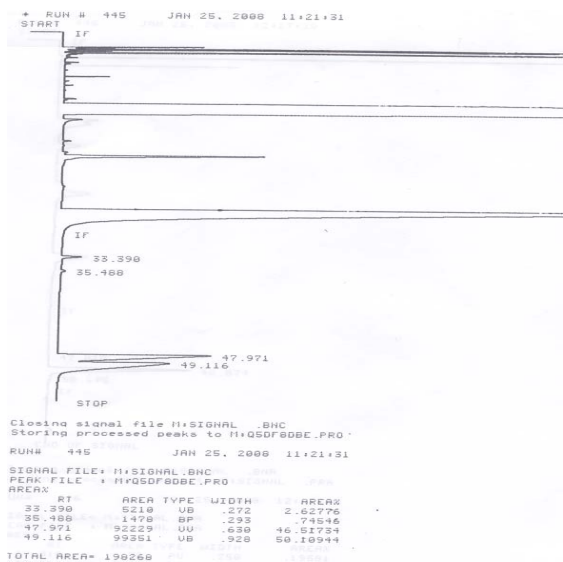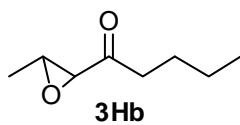

97%ee, obtained from Q-NH<sub>2</sub>  
catalyzed reaction

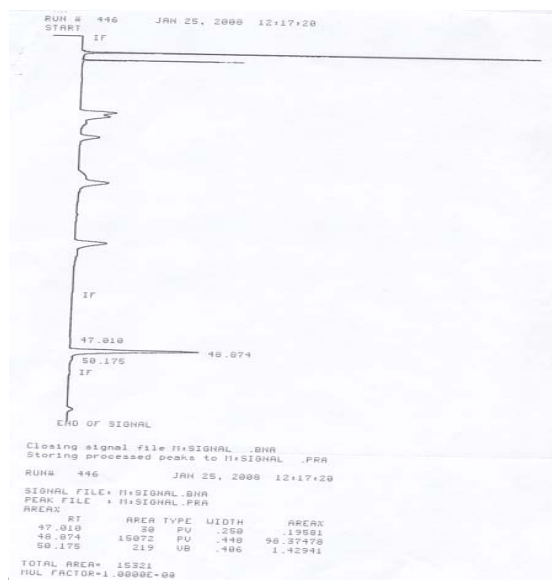

Supplement: NIHMS95245-supplement-Supporting_Inf.pdf [file NIHMS95245-supplement-Supporting_Inf.pdf]
